# Supplementary material for: Synthesis of remote fluoroalkylated alkenes by a palladium-catalyzed relay Heck-type reaction
Source: Royal Society of Chemistry journal article supplement (doi:10.1039/c9cc10048b), 2020-01-01

# Synthesis of Remote Fluoroalkylated Alkenes by Palladium-Catalyzed Relay Heck-Type Reaction

Lixin Li,<sup>\*a</sup> Zhengguang Zhao,<sup>a</sup> Jing Xu,<sup>\*a</sup> Haotian Luo,<sup>a</sup> Yong Li,<sup>a</sup> Xiantao Ma,<sup>a</sup> Lin Tang,<sup>a</sup> Bo Ren,<sup>a</sup> Xinhua Cao<sup>a</sup>  
and Yan-Na Ma<sup>b</sup>

<sup>a</sup>College of Chemistry and Chemical Engineering, Xinyang Normal University, Xinyang, Henan 464000, China

<sup>b</sup>College of Chemistry and Chemical Engineering, Henan Normal University, Xinxiang, Henan 453007, China

## Contents

|                                                 |    |
|-------------------------------------------------|----|
| 1. General information.....                     | 2  |
| 2. Optimization of the reaction conditions..... | 3  |
| 3. General procedures.....                      | 4  |
| 4. Characterization of new compounds.....       | 9  |
| 5. Control experiments.....                     | 16 |
| 6. Spectra of new compounds.....                | 18 |

## 1. General information

NMR Spectra was recorded on a JNM-ECZ00R/S3 ( $^1\text{H}$  NMR 600 MHz,  $^{13}\text{C}$  NMR 150 MHz,  $^{19}\text{F}$  NMR 564 MHz). Chemical shift are given in ppm. The spectra are calibrated to residual  $^1\text{H}$  and  $^{13}\text{C}$  singals of the solvents. Multiplicities are abbreviated as follows: singlet (s), doublet (d), triplet (t), quartet (q), doublet-doublet (dd), quintet (quint), septet (sept), multiplet (m), and broad (br). High-resolution electrospray ionization and electronic impact mass spectrometry was performed on a MicroMass Waters Xevo G2-XS QTof.

**Materials and Methods:** Unless otherwise stated, starting materials were purchased from Energy and Aldrich. Conversion was monitored by thin layer chromatography (TLC) using Merck TLC silica gel 60 F254. Compounds were visualized by UV light at 254 nm and by dipping the plates in an ehanolic vanillin/sulfuric acid solution or an aqueous potassium permanganate solution followed by heating. Flash column chromatography was performed over silica gel (200-400 mesh). Unless otherwise stated. Starting materials were according to previously reported procedures.

## 2. Optimization of the reaction conditions<sup>[a]</sup>

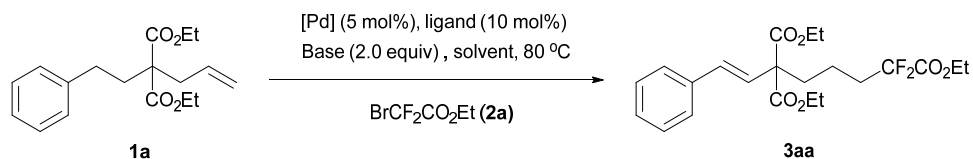

| Entry             | [Pd]                                                 | Ligand          | Base                               | Solvent                 | Yield(%) <sup>[b]</sup> |
|-------------------|------------------------------------------------------|-----------------|------------------------------------|-------------------------|-------------------------|
| 1                 | Pd(PPh <sub>3</sub> ) <sub>2</sub> Cl <sub>2</sub>   | Xantphos        | K <sub>2</sub> CO <sub>3</sub>     | DCM                     | 48                      |
| 2                 | Pd(PPh <sub>3</sub> ) <sub>2</sub> Cl <sub>2</sub>   | Xantphos        | K <sub>2</sub> CO <sub>3</sub>     | DCE                     | 33                      |
| 3                 | Pd(PPh <sub>3</sub> ) <sub>2</sub> Cl <sub>2</sub>   | Xantphos        | K <sub>2</sub> CO <sub>3</sub>     | THF                     | 37                      |
| 4                 | Pd(PPh <sub>3</sub> ) <sub>2</sub> Cl <sub>2</sub>   | Xantphos        | K <sub>2</sub> CO <sub>3</sub>     | Dioxane                 | 39                      |
| <b>5</b>          | <b>Pd(PPh<sub>3</sub>)<sub>2</sub>Cl<sub>2</sub></b> | <b>Xantphos</b> | <b>K<sub>2</sub>CO<sub>3</sub></b> | <b>CH<sub>3</sub>CN</b> | <b>72</b>               |
| 6                 | Pd(PPh <sub>3</sub> ) <sub>2</sub> Cl <sub>2</sub>   | Xantphos        | K <sub>2</sub> CO <sub>3</sub>     | PhCH <sub>3</sub>       | 33                      |
| 7                 | Pd(PPh <sub>3</sub> ) <sub>2</sub> Cl <sub>2</sub>   | Xantphos        | K <sub>2</sub> CO <sub>3</sub>     | MeOH                    | NR <sup>[c]</sup>       |
| 8                 | Pd(PPh <sub>3</sub> ) <sub>2</sub> Cl <sub>2</sub>   | Xantphos        | K <sub>2</sub> CO <sub>3</sub>     | DMF                     | trace                   |
| 9                 | Pd(PPh <sub>3</sub> ) <sub>2</sub> Cl <sub>2</sub>   | Xantphos        | K <sub>2</sub> CO <sub>3</sub>     | DMSO                    | trace                   |
| 10                | Pd(CH <sub>3</sub> CN) <sub>2</sub> Cl <sub>2</sub>  | Xantphos        | K <sub>2</sub> CO <sub>3</sub>     | CH <sub>3</sub> CN      | 37                      |
| 11                | Pd <sub>2</sub> (dba) <sub>3</sub>                   | Xantphos        | K <sub>2</sub> CO <sub>3</sub>     | CH <sub>3</sub> CN      | 30                      |
| 12                | [Pd(allyl)Cl] <sub>2</sub>                           | Xantphos        | K <sub>2</sub> CO <sub>3</sub>     | CH <sub>3</sub> CN      | 20                      |
| 13                | Pd(TFA) <sub>2</sub>                                 | Xantphos        | K <sub>2</sub> CO <sub>3</sub>     | CH <sub>3</sub> CN      | 25                      |
| 14                | Pd(PPh <sub>3</sub> ) <sub>4</sub>                   | Xantphos        | K <sub>2</sub> CO <sub>3</sub>     | CH <sub>3</sub> CN      | 42                      |
| 15                | Pd(PPh <sub>3</sub> ) <sub>2</sub> Cl <sub>2</sub>   | Xantphos        | K <sub>3</sub> PO <sub>4</sub>     | CH <sub>3</sub> CN      | 45                      |
| 16                | Pd(PPh <sub>3</sub> ) <sub>2</sub> Cl <sub>2</sub>   | Xantphos        | KH <sub>2</sub> PO <sub>4</sub>    | CH <sub>3</sub> CN      | 15                      |
| 17                | Pd(PPh <sub>3</sub> ) <sub>2</sub> Cl <sub>2</sub>   | Xantphos        | K <sub>2</sub> HPO <sub>4</sub>    | CH <sub>3</sub> CN      | 52                      |
| 18                | Pd(PPh <sub>3</sub> ) <sub>2</sub> Cl <sub>2</sub>   | Xantphos        | Na <sub>3</sub> PO <sub>4</sub>    | CH <sub>3</sub> CN      | trace                   |
| 19                | Pd(PPh <sub>3</sub> ) <sub>2</sub> Cl <sub>2</sub>   | Xantphos        | Li <sub>3</sub> PO <sub>4</sub>    | CH <sub>3</sub> CN      | trace                   |
| 20                | Pd(PPh <sub>3</sub> ) <sub>2</sub> Cl <sub>2</sub>   | Xantphos        | Cs <sub>2</sub> CO <sub>3</sub>    | CH <sub>3</sub> CN      | 28                      |
| 21                | Pd(PPh <sub>3</sub> ) <sub>2</sub> Cl <sub>2</sub>   | Xantphos        | Na <sub>2</sub> CO <sub>3</sub>    | CH <sub>3</sub> CN      | 25                      |
| 22                | Pd(PPh <sub>3</sub> ) <sub>2</sub> Cl <sub>2</sub>   | Xantphos        | KOAc                               | CH <sub>3</sub> CN      | 44                      |
| 23                | Pd(PPh <sub>3</sub> ) <sub>2</sub> Cl <sub>2</sub>   | Xantphos        | NEt <sub>3</sub>                   | CH <sub>3</sub> CN      | NR                      |
| 24                | Pd(PPh <sub>3</sub> ) <sub>2</sub> Cl <sub>2</sub>   | DPPE            | K <sub>2</sub> CO <sub>3</sub>     | CH <sub>3</sub> CN      | NR                      |
| 25                | Pd(PPh <sub>3</sub> ) <sub>2</sub> Cl <sub>2</sub>   | DPPP            | K <sub>2</sub> CO <sub>3</sub>     | CH <sub>3</sub> CN      | NR                      |
| 26                | Pd(PPh <sub>3</sub> ) <sub>2</sub> Cl <sub>2</sub>   | DPPB            | K <sub>2</sub> CO <sub>3</sub>     | CH <sub>3</sub> CN      | NR                      |
| 27                | Pd(PPh <sub>3</sub> ) <sub>2</sub> Cl <sub>2</sub>   | DPPF            | K <sub>2</sub> CO <sub>3</sub>     | CH <sub>3</sub> CN      | NR                      |
| 28                | Pd(PPh <sub>3</sub> ) <sub>2</sub> Cl <sub>2</sub>   | DPEphos         | K <sub>2</sub> CO <sub>3</sub>     | CH <sub>3</sub> CN      | 22                      |
| 29                | Pd(PPh <sub>3</sub> ) <sub>2</sub> Cl <sub>2</sub>   | BINAP           | K <sub>2</sub> CO <sub>3</sub>     | CH <sub>3</sub> CN      | NR                      |
| 30 <sup>[d]</sup> | Pd(PPh <sub>3</sub> ) <sub>2</sub> Cl <sub>2</sub>   | Xantphos        | K <sub>2</sub> CO <sub>3</sub>     | CH <sub>3</sub> CN      | trace                   |
| 31 <sup>[e]</sup> | Pd(PPh <sub>3</sub> ) <sub>2</sub> Cl <sub>2</sub>   | Xantphos        | K <sub>2</sub> CO <sub>3</sub>     | CH <sub>3</sub> CN      | trace                   |

[a] Reaction condition: **1a** (0.1 mmol), **2a** (0.2 mmol), [Pd] (5 mol %), ligand (10 mol%), Base (0.2 mmol), solvent (1.0 mL), under N<sub>2</sub>, 80 °C, 24h. [b] Yield determined by <sup>19</sup>F NMP using PhCF<sub>3</sub> as an internal standard. [c] NR = no reaction [d] at 25 °C. [e] Blue LED.

### 3. General procedures

#### 3.1 General procedures for unknown substances

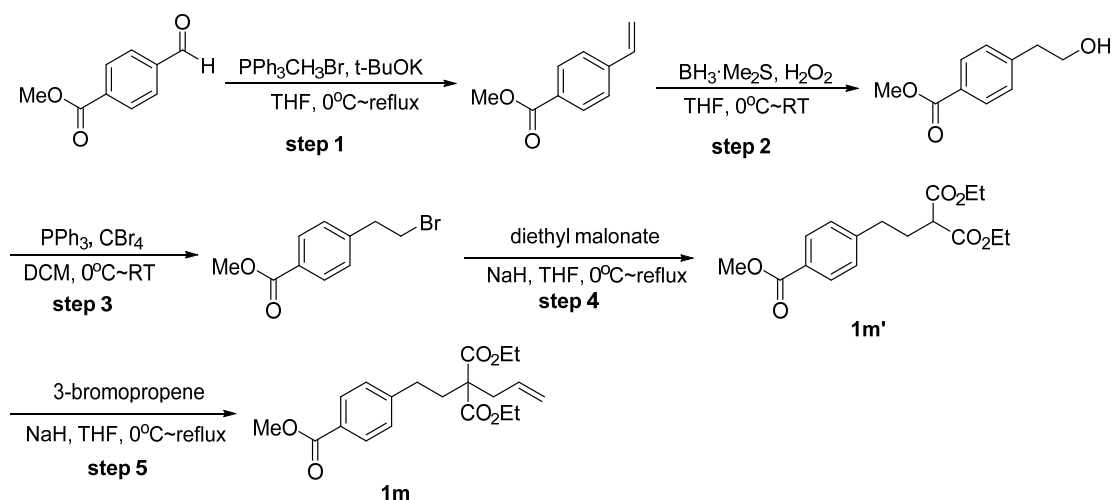

**Step 2:** In an 500 mL oven-dried Schlenk flask containing a magnetic stir bar under inert atmosphere, potassium tert-butyrate (60 mmol, 6.72 g) was added into the solution of methyl 4-formylbenzoate (50 mmol, 8.2 g) in THF (250 mL) under ice bath. After the mixture was stirred for one hour, methyltriphenylphosphonium bromide (60 mmol, 21.42 g) was added the reaction mixture under ice bath. The resulting mixture was stirred overnight at room temperature. After the reaction completed, saturated NaCl solution (200 mL) was added to quench the reaction and extracted with hexane (50 mL x3), the combined organic layers was dried by  $\text{NaSO}_4$  and concentrated under reduced pressure. The crude mixture was purified by flash column chromatography through silica gel (eluent: hexane) to give the pure alkene (8.09 g, 99%).

**Step 2:** In an 250 mL oven-dried Schlenk flask containing a magnetic bar under inertatmosphere,  $\text{BH}_3 \cdot \text{Me}_2\text{S}$  (2 M in THF, 8.74 mL) was added into the solution of the obtained alkene (8.4 g, 51.7 mmol) in THF (50 mL) under ice bath. After the reaction mixture was stirred for two hours at room temperature, water (20 mL), aqueous NaOH solution (3 M, 18 mL), aqueous  $\text{H}_2\text{O}_2$  solution (30% w/w, 34 mL) was added into the reaction mixture subsequently under ice bath, then the resulting mixture was stirred for two hours at room temperature. The reaction was quenched by DCM (25 mL), the mixture was extracted with DCM (50 mL x3), and the combined organic layers was dried by  $\text{NaSO}_4$  and concentrated under reduced pressure. The crude mixture was purified by flash column chromatography through silica gel (hexane/ ethyl acetate = 3/1) to give the pure alcohol (4.75 g, 51%). The experimental data are in agreement with the literature report (*J. Am. Chem.* **2006**, *128*, 16020-16021).

**Step 3:** In an 250 mL oven-dried Schlenk flask containing a magnetic bar under inertatmosphere,  $\text{PPh}_3$  (12.5 mmol, 3.3 g),  $\text{CBr}_4$  (12.5 mmol, 4.13 g) was added into the solution of the obtained alcohol (10 mmol, 1.8 g) in DCM (30 mL) under ice bath. After the reaction mixture was stirred overnight at room temperature, the reaction was quenched by saturated NaCl solution (25 mL), the mixture was extracted with DCM (50 mL x3), and the combined organic layers was dried by  $\text{NaSO}_4$  and concentrated under reduced pressure. The crude mixture was purified by flash column chromatography through silica gel (hexane/ ethyl acetate = 10/1) to give the pure homobenzylic



bromide (2.2 g, 92%). The experimental data are in agreement with the literature report (*Chem.-Eur. J.* **2019**, *38*, 9001-9005).

**Step 4:** In an 250 mL oven-dried Schlenk flask containing a magnetic bar under inert atmosphere, NaH (11 mmol, 440 mg) was added into the solution of diethyl malonate (9.9 mmol, 1.6 g) in THF (100 mL) under ice bath. After the reaction mixture was stirred for one hour at room temperature, the obtained homobenzylic bromide (9 mmol, 2.2 g) was added, and then the reaction mixture was stirred under 70 °C overnight. The reaction was quenched by saturated NaCl solution (25 mL), the mixture was extracted with ethyl acetate (50 mL x3), and the combined organic layers was dried by NaSO<sub>4</sub> and concentrated under reduced pressure. The crude mixture was purified by flash column chromatography through silica gel (hexane/ ethyl acetate = 5/1) to give the pure product diethyl 2-(4-(methoxycarbonyl)phenethyl)malonate **1m'** (2.09 g, 72%). <sup>1</sup>H NMR (600 MHz, CDCl<sub>3</sub>) δ 7.97 (d, *J* = 8.2 Hz, 2H), 7.26 (t, *J* = 5.5 Hz, 2H), 4.22 -4.18 (m, 4H), 3.90 (s, 3H), 3.33 (t, *J* = 7.3 Hz, 1H), 2.73 (t, *J* = 7.5 Hz, 2H), 2.25 - 2.21 (m, 2H), 1.28 (t, *J* = 7.0 Hz, 6H); <sup>13</sup>C NMR (150 MHz, CDCl<sub>3</sub>) δ 169.15, 167.03, 146.12, 129.82, 128.56, 128.22, 61.48, 52.03, 51.16, 33.31, 29.92, 14.07; HRMS (ESI) *m/z* calcd for C<sub>17</sub>H<sub>22</sub>O<sub>6</sub>Na [M+Na<sup>+</sup>] 345.1309, found 345.1325.

**Step 5:** In an 250 mL oven-dried Schlenk flask containing a magnetic bar under inert atmosphere, NaH (7.4 mmol, 297 mg) was added into the solution of the obtained diethyl 2-(4-(methoxycarbonyl)phenethyl)malonate (6 mmol, 2.0 g) in THF (50 mL) under ice bath. After the reaction mixture was stirred for one hour at room temperature, the obtained 3-bromopropene (12 mmol, 1.1 mL) was added, and then the reaction mixture was stirred under 70 °C overnight. The reaction was quenched by saturated NaCl solution (25 mL), the mixture was extracted with ethyl acetate (50 mL x3), and the combined organic layers was dried by NaSO<sub>4</sub> and concentrated under reduced pressure. The crude mixture was purified by flash column chromatography through silica gel (hexane/ ethyl acetate = 3/1) to give the pure product **1m** (1.77 g, 81%). <sup>1</sup>H NMR (600 MHz, CDCl<sub>3</sub>) δ 7.95 (d, *J* = 8.2 Hz, 2H), 7.23 (t, *J* = 8.2 Hz, 2H), 5.71 - 5.64 (m, 1H), 5.17 - 5.12 (m, 2H), 4.22 (q, *J* = 7.1 Hz, 2H), 3.90 (s, 3H), 2.74 (d, *J* = 7.5 Hz, 2H), 2.59 - 2.56 (m, 2H), 2.17-2.15 (m, 2H), 1.28 (t, *J* = 7.4 Hz, 6H); <sup>13</sup>C NMR (150 MHz, CDCl<sub>3</sub>) δ 170.94, 167.04, 146.91, 132.24, 129.76, 128.39, 128.04, 119.19, 61.34, 57.14, 52.00, 37.21, 33.89, 30.54, 14.1; HRMS (ESI) *m/z* calcd for C<sub>20</sub>H<sub>26</sub>O<sub>6</sub>Na [M+Na<sup>+</sup>] 385.1622, found 385.1633.

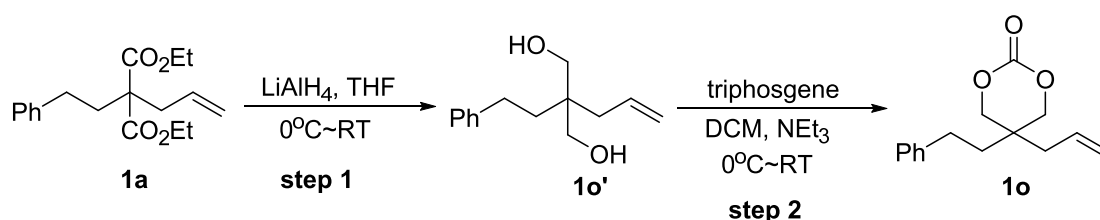

**Step 1:** To an oven-dried 200 mL Schlenk flask was added 50 mL THF, LiAlH<sub>4</sub> (1.2equiv), and **1a** (3 mmol, 912 mg) at 0°C, the resulting mixture was stirred overnight under room temperature. After the reaction was completed, aqueous HCl solution (1N, 20 mL) was added into the reaction mixture slowly under ice bath and extracted with ethyl acetate (30 mL x3), the combined organic layers was dried over MgSO<sub>4</sub> and concentrated under reduced pressure. The crude mixture was purified by flash column chromatography through silica gel (eluent: hexane/ethyl acetate = 5/1) to afford the pure product **1o'** (528 mg, 80%) as a colorless oil. <sup>1</sup>H NMR (600 MHz, CDCl<sub>3</sub>) δ 7.29 - 7.27 (m, 2H), 7.20 - 7.17 (m, 3H), 5.90 - 5.83 (m, 1H), 5.19 - 5.13 (m, 2H), 3.65 (s, 4H), 2.62 -

2.59 (m, 2H), 2.23(br, 2H), 2.19 (d,  $J = 7.4$  Hz, 2H), 1.63 - 1.60 (m, 2H);  $^{13}\text{C}$  NMR (150 MHz,  $\text{CDCl}_3$ )  $\delta$  142.62, 133.83, 128.41, 128.25, 125.83, 118.13, 68.68, 41.80, 35.82, 33.45, 29.44; HRMS (ESI)  $m/z$  calcd for  $\text{C}_{14}\text{H}_{19}\text{O}_2$  [ $\text{M}-\text{H}^+$ ] 219.1391, found 219.1369.

**Step 2:** To an oven-dried 50 mL Schlenk flask was added **1o'** (0.5 mmol, 110 mg), DCM (10 mL), triphosgene (0.5 mmol, 148.4 mg) and  $\text{NEt}_3$  (1.0 mmol, 101.2 mg) subsequently under ice bath. The resulting mixture was stirred overnight under room temperature. After the reaction was completed, the solvent was removed under reduced pressure. The crude mixture was purified by flash column chromatography through silica gel (eluent: hexane/ethyl acetate = 10/1) to give the pure product **1o** (80 mg, 65%) as a colorless oil.  $^1\text{H}$  NMR (600 MHz,  $\text{CDCl}_3$ )  $\delta$  7.30 (t,  $J = 7.5$  Hz, 2H), 7.22 (t,  $J = 7.4$  Hz, 1H), 7.16 (t,  $J = 7.3$  Hz, 2H), 5.82 - 5.75 (m, 1H), 5.28 - 5.24 (m, 2H), 4.21 - 4.16 (m, 4H), 2.65 - 2.62 (m, 2H), 2.32 (d,  $J = 7.4$  Hz, 2H), 1.74 - 1.71 (m, 2H);  $^{13}\text{C}$  NMR (150 MHz,  $\text{CDCl}_3$ )  $\delta$  148.21, 140.59, 130.58, 128.68, 128.11, 126.43, 120.70, 74.71, 35.04, 33.96, 33.14, 29.21; HRMS (ESI)  $m/z$  calcd for  $\text{C}_{15}\text{H}_{18}\text{O}_3$  [ $\text{M}+\text{Na}^+$ ] 269.1148, found 269.1150.

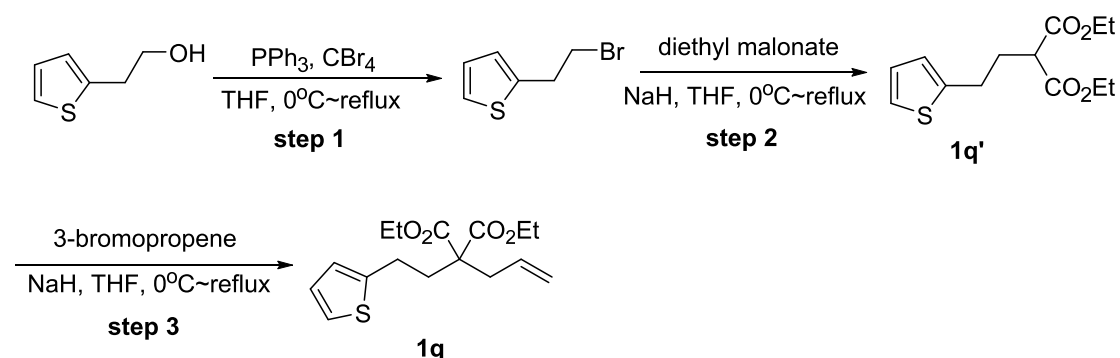

**Step 1:** In an 500 mL oven-dried Schlenk flask containing a magnetic bar under inert atmosphere,  $\text{PPh}_3$  (40.0 mmol, 10.5 g),  $\text{CBr}_4$  (40.0 mmol, 13.08 g) was added into the solution of the alcohol (11 mmol, 5.6 g) in THF (200 mL) under ice bath. After the reaction mixture was stirred overnight at room temperature, the reaction was quenched by saturated  $\text{NaCl}$  solution (25 mL), the mixture was extracted with ethyl acetate (50 mL x3), and the combined organic layers was dried by  $\text{NaSO}_4$  and concentrated under reduced pressure. The crude mixture was purified by flash column chromatography through silica gel (hexane/ ethyl acetate = 100/1) to give the pure 2-(2-bromoethyl)thiophene (7.1 g, 94%). The experimental data are in agreement with the literature report (*Chem.-Eur. J.* **2019**, *38*, 9001-9005).

**Step 2:** In an 250 mL oven-dried Schlenk flask containing a magnetic bar under inert atmosphere,  $\text{NaH}$  (15 mmol, 600 mg) was added into the solution of diethyl malonate (10.0 mmol, 1.6 g) in THF (50 mL) under ice bath. After the reaction mixture was stirred for one hour at room temperature, 2-(2-bromoethyl)thiophene (10 mmol, 1.89 g) was added, and then the reaction mixture was stirred under  $70^\circ\text{C}$  overnight. The reaction was quenched by saturated  $\text{NaCl}$  solution (25 mL), the mixture was extracted with ethyl acetate (50 mL x3), and the combined organic layers was dried by  $\text{NaSO}_4$  and concentrated under reduced pressure. The crude mixture was purified by flash column chromatography through silica gel (hexane/ ethyl acetate = 100/1) to give the pure product diethyl 2-(2-(thiophen-2-yl)ethyl)malonate **1q'** (810 mg, 30%).  $^1\text{H}$  NMR (600 MHz,  $\text{CDCl}_3$ )  $\delta$  7.14 (dd,  $J_1 = 5.3$  Hz,  $J_2 = 1.0$  Hz, 1H), 6.93 - 6.91 (m, 1H), 6.81 - 6.80 (m, 1H), 4.22 (dq,  $J_1 = 7.4$  Hz,  $J_2 = 1.8$  Hz, 4H), 3.40 (t,  $J = 7.4$  Hz, 1H), 2.74 (t,  $J = 7.7$  Hz, 2H), 2.28 (q,  $J$

= 7.6 Hz, 2H), 1.28 (t,  $J = 7.0$  Hz, 6H);  $^{13}\text{C}$  NMR (150 MHz,  $\text{CDCl}_3$ )  $\delta$  169.16, 143.09, 126.81, 124.85, 123.49, 61.43, 50.89, 30.51, 27.32, 14.05; HRMS (ESI)  $m/z$  calcd for  $\text{C}_{13}\text{H}_{18}\text{O}_4\text{SNa}$  [ $\text{M}+\text{Na}^+$ ] 293.0818, found 293.0826.

**Step 3:** In an oven-dried Schlenk flask containing a magnetic bar under inert atmosphere, NaH (2.6 mmol, 106 mg) was added into the solution of the obtained diethyl 2-(2-(thiophen-2-yl)ethyl)malonate (2.2 mmol, 600 mg) in THF (50 mL) under ice bath. After the reaction mixture was stirred for one hour at room temperature, the obtained 3-bromopropene (4.2 mmol, 0.36 mL) was added, and then the reaction mixture was stirred under 70 °C overnight. The reaction was quenched by saturated NaCl solution (25 mL), the mixture was extracted with ethyl acetate (50 mL x3), and the combined organic layers was dried by  $\text{NaSO}_4$  and concentrated under reduced pressure. The crude mixture was purified by flash column chromatography through silica gel (hexane/ ethyl acetate = 3/1) to give the pure product **1q** (401 mg, 59%).  $^1\text{H}$  NMR (600 MHz,  $\text{CDCl}_3$ )  $\delta$  7.12 - 7.11 (m, 1H), 6.92 (dd,  $J_1 = 5.2$  Hz,  $J_2 = 3.4$  Hz, 1H), 6.80 (d,  $J = 3.4$  Hz, 1H), 5.71 - 5.64 (m, 1H), 5.16 - 5.11 (m, 2H), 4.22 (q,  $J = 7.0$  Hz, 4H), 2.78 - 2.75 (m, 2H), 2.72 (d,  $J = 7.4$  Hz, 2H), 2.27 - 2.24 (m, 2H), 1.27 (t,  $J = 7.1$  Hz, 6H);  $^{13}\text{C}$  NMR (150 MHz,  $\text{CDCl}_3$ )  $\delta$  170.88, 144.03, 132.16, 126.71, 124.22, 123.18, 119.22, 61.32, 57.06, 37.15, 34.21, 24.60, 14.10; HRMS (ESI)  $m/z$  calcd for  $\text{C}_{16}\text{H}_{22}\text{O}_4\text{SNa}$  [ $\text{M}+\text{Na}^+$ ] 333.1131, found 333.1129.

### 3.2 General procedures for relay Heck-type reaction

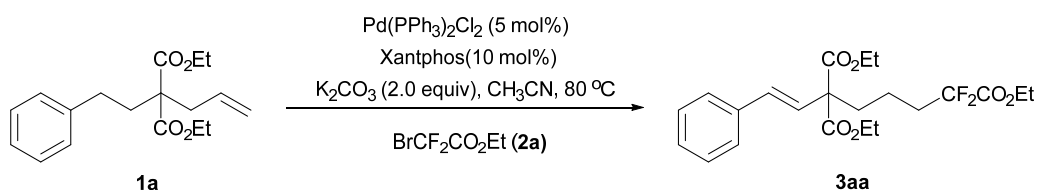

To an oven-dried 10 mL Schlenk tube was added  $\text{Pd}(\text{PPh}_3)_2\text{Cl}_2$  (5 mol%), Xantphos (10 mol%), and  $\text{K}_2\text{CO}_3$  (2.0 equiv). The tube was evacuated and back-filled with nitrogen (this process was repeated three times), **1a** (0.2 mmol, 29.2 mg), **2a** (0.4 mmol, 80.4 mg) and  $\text{CH}_3\text{CN}$  (2.0 mL) was added subsequently via syringe. The resulting mixture was stirred under 80 °C until the reaction completion (about 24 hours). The mixture was concentrated under reduced pressure and purified by column chromatography on silica gel with PE/EA (20:1 to 5:1) as eluent to give **3aa** (61.3 mg, 72% yield).

#### Procedure for Gram-scale reaction:

To an oven-dried 100 mL Schlenk round flask was added  $\text{Pd}(\text{PPh}_3)_2\text{Cl}_2$  (5 mol%), Xantphos (10 mol%), and  $\text{K}_2\text{CO}_3$  (2.0 equiv). The tube was evacuated and back-filled with nitrogen (this process was repeated three times), **1a** (3.0 mmol, 730.0 mg), **2a** (6.0 mmol, 1.21 g) and  $\text{CH}_3\text{CN}$  (20.0 mL) was added subsequently via syringe. The resulting mixture was stirred at 80 °C until the reaction completion about 36 hours. The mixture was filtered and concentrated under reduced pressure. The crude mixture was purified by column chromatography on silica gel with PE/EA (20:1 to 5:1) as eluent to give **3aa** (852.2 mg, 67% yield).

### 3.3 Problematic substrates

Alkenes in Scheme 2

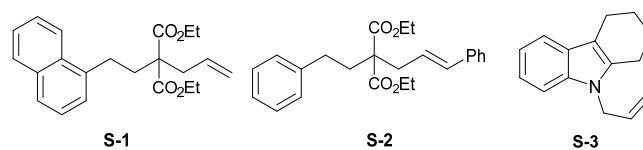

Fluoroalkyl Bromides in Scheme 3

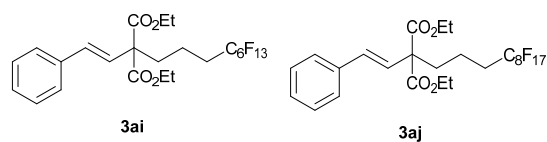

These substrates (**S-1**, **S-2**, **S-3**) in above figure are not suitable for the relay Heck-type reaction. When **S-1** acted as substrate, only trace product was obtained. No reaction occurred when **S-2** acted as substrate due to the steric effect. When analogues of *N*-allylic substrate (**S-3**) acted as substrate, no reaction occurred.

The desired products **3ai** and **3aj** was obtained combined with the corresponding start material. Because the two compounds can separate hardly, the yield was detected by  $^{19}\text{F}$  spectrum using  $\text{PhCF}_3$  as internal standard.

## 4. Characterization of new compounds

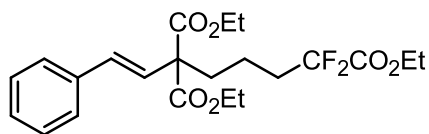

### triethyl (E)-1,1-difluoro-7-phenylhept-6-ene-1,5,5-tricarboxylate (3aa):

Colorless oil, 60.5 mg, (71% yield).  $^1\text{H}$  NMR (600 MHz,  $\text{CDCl}_3$ )  $\delta$  7.41 (d,  $J = 7.4$  Hz, 2H), 7.32 (t,  $J = 7.4$  Hz, 2H), 7.26 (t,  $J = 7.5$  Hz, 1H), 6.74 (d,  $J = 16.6$  Hz, 1H), 6.49 (d,  $J = 16.6$  Hz, 1H), 4.29 - 4.21 (m, 6H), 2.20 (t,  $J = 8.5$  Hz, 2H), 2.13 - 2.04 (m, 2H), 1.49 - 1.43 (m, 2H), 1.30 - 1.25 (m, 9H);  $^{19}\text{F}$  NMR (564 MHz,  $\text{CDCl}_3$ )  $\delta$  -105.86 (t,  $J = 16.9$  Hz, 2F);  $^{13}\text{C}$  NMR (150 MHz,  $\text{CDCl}_3$ )  $\delta$  170.18, 164.08 (t,  $J = 32.9$  Hz), 136.30, 131.56, 128.55, 127.99, 126.52, 125.73, 115.87 (t,  $J = 249.1$  Hz), 62.79, 61.70, 59.21, 34.95, 34.49 (t,  $J = 23.1$  Hz), 16.64, 13.98, 13.85; HRMS (ESI)  $m/z$  calcd for  $\text{C}_{22}\text{H}_{29}\text{F}_2\text{O}_6$  [ $\text{M}+\text{H}^+$ ] 427.1927, found 427.1920.

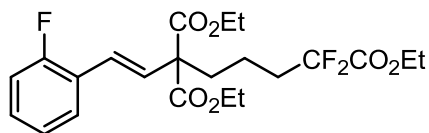

### triethyl (E)-1,1-difluoro-7-(2-fluorophenyl)hept-6-ene-1,5,5-tricarboxylate (3ba):

Colorless oil, 63.9 mg, (72% yield).  $^1\text{H}$  NMR (600 MHz,  $\text{CDCl}_3$ )  $\delta$  7.41 (dt,  $J_1 = 7.7$  Hz,  $J_2 = 1.7$  Hz, 1H), 7.25 - 7.21 (m, 1H), 7.11 (t,  $J = 7.5$  Hz, 1H), 7.04-7.01 (m, 1H), 6.79 (d,  $J = 17.0$  Hz, 1H), 6.66 (d,  $J = 16.9$  Hz, 1H), 4.30 - 4.22 (m, 6H), 2.20 (t,  $J = 8.4$  Hz, 2H), 2.12 - 2.06 (m, 2H), 1.50 - 1.44 (m, 2H), 1.30 (t,  $J = 7.0$  Hz, 3H), 1.26 (t,  $J = 7.4$  Hz, 6H);  $^{19}\text{F}$  NMR (564 MHz,  $\text{CDCl}_3$ )  $\delta$  -105.91 (t,  $J = 16.7$  Hz, 2F), -117.96 (t,  $J = 13.1$  Hz, 1F);  $^{13}\text{C}$  NMR (150 MHz,  $\text{CDCl}_3$ )  $\delta$  170.03, 164.09 (t,  $J = 32.5$  Hz), 160.95 (d,  $J = 248.2$  Hz), 129.37 (d,  $J = 8.4$  Hz), 128.21 (d,  $J = 3.8$  Hz), 127.20 (d,  $J = 2.6$  Hz), 124.19, 124.11 (d,  $J = 1.7$  Hz), 124.06 (d,  $J = 3.3$  Hz), 115.85 (d,  $J = 248.7$  Hz), 115.77 (d,  $J = 221.7$  Hz), 62.81, 61.79, 59.54, 34.89, 34.52 (t,  $J = 23.2$  Hz), 16.66, 13.98, 13.86; HRMS (ESI)  $m/z$  calcd for  $\text{C}_{22}\text{H}_{28}\text{F}_3\text{O}_6$  [ $\text{M}+\text{H}^+$ ] 445.1832, found 445.1825.

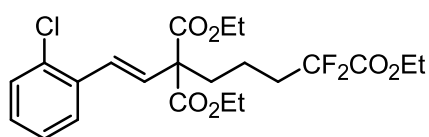

### triethyl (E)-7-(2-chlorophenyl)-1,1-difluorohept-6-ene-1,5,5-tricarboxylate (3ca):

Colorless oil, 60.7 mg, (66% yield).  $^1\text{H}$  NMR (600 MHz,  $\text{CDCl}_3$ )  $\delta$  7.57 (dd,  $J_1 = 7.6$  Hz,  $J_2 = 1.3$  Hz, 1H), 7.35 (dd,  $J_1 = 7.6$  Hz,  $J_2 = 1.0$  Hz, 1H), 7.24 (d,  $J = 6.8$  Hz, 1H), 7.21 (dt,  $J_1 = 7.6$  Hz,  $J_2 = 1.4$  Hz, 1H), 6.89 (d,  $J = 16.6$  Hz, 1H), 6.69 (d,  $J = 16.6$  Hz, 1H), 4.30 (q,  $J = 7.3$  Hz, 2H), 4.26 (q,  $J = 7.1$  Hz, 4H), 2.22 (t,  $J = 8.3$  Hz, 2H), 2.14 - 2.06 (m, 2H), 1.52 - 1.46 (m, 2H), 1.30 (t,  $J = 7.0$  Hz, 3H), 1.26 (t,  $J = 7.0$  Hz, 6H);  $^{19}\text{F}$  NMR (564 MHz,  $\text{CDCl}_3$ )  $\delta$  -105.96 (t,  $J = 17.4$  Hz, 2F);  $^{13}\text{C}$  NMR (150 MHz,  $\text{CDCl}_3$ )  $\delta$  169.99, 164.10 (t,  $J = 32.4$  Hz), 134.62, 133.27, 129.60, 129.01, 128.69, 128.21, 126.97, 126.89, , 115.84 (t,  $J = 248.3$  Hz), 62.82, 61.82, 59.55, 34.88, 34.56 (t,  $J = 23.1$  Hz), 16.68, 14.02, 13.89; HRMS (ESI)  $m/z$  calcd for  $\text{C}_{22}\text{H}_{28}^{35}\text{ClF}_2\text{O}_6$  [ $\text{M}+\text{H}^+$ ] 461.1531, found 461.1537.

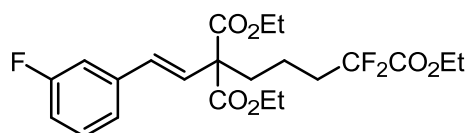

**triethyl (E)-1,1-difluoro-7-(3-fluorophenyl)hept-6-ene-1,5,5-tricarboxylate (3da):**

Colorless oil, 62.1 mg, (70% yield).  $^1\text{H}$  NMR (600 MHz,  $\text{CDCl}_3$ )  $\delta$  7.30 - 7.27 (m, 1H), 7.17 (d,  $J = 7.7$  Hz, 1H), 7.12 - 7.10 (m, 1H), 6.97 (dt,  $J_1 = 8.3$  Hz,  $J_2 = 2.0$  Hz, 1H), 6.73 (d,  $J = 16.6$  Hz, 1H), 6.46 (d,  $J = 16.6$  Hz, 1H), 4.29 - 4.22 (m, 6H), 2.19 (t,  $J = 8.5$  Hz, 2H), 2.13 - 2.04 (m, 2H), 1.48 - 1.42 (m, 2H), 1.29 (t,  $J = 7.1$  Hz, 3H), 1.26 (t,  $J = 7.1$  Hz, 6H);  $^{19}\text{F}$  NMR (564 MHz,  $\text{CDCl}_3$ )  $\delta$  -105.85 (t,  $J = 15.0$  Hz, 2F), -113.25 (q,  $J = 8.2$  Hz, 1F);  $^{13}\text{C}$  NMR (150 MHz,  $\text{CDCl}_3$ )  $\delta$  169.99, 164.07 (t,  $J = 32.5$  Hz), 163.83 (d,  $J = 24.4$  Hz), 138.65 (d,  $J = 7.5$  Hz), 130.56 (d,  $J = 1.8$  Hz), 130.05 (d,  $J = 8.0$  Hz), 127.25, 122.47, 115.85 (d,  $J = 249.2$  Hz), 114.88 (d,  $J = 21.0$  Hz), 113.06 (d,  $J = 21.7$  Hz), 62.82, 61.81, 59.22, 34.88, 34.45 (t,  $J = 23.5$  Hz), 16.65, 13.99, 13.87; HRMS (ESI)  $m/z$  calcd for  $\text{C}_{22}\text{H}_{28}\text{F}_3\text{O}_6$  [ $\text{M}+\text{H}^+$ ] 445.1832, found 445.1827.

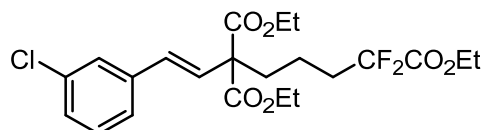

**triethyl (E)-7-(3-chlorophenyl)-1,1-difluorohept-6-ene-1,5,5-tricarboxylate (3ea):**

Colorless oil, 61.6 mg, (67% yield).  $^1\text{H}$  NMR (600 MHz,  $\text{CDCl}_3$ )  $\delta$  7.40 (s, 1H), 7.27 - 7.22 (m, 3H), 6.74 (d,  $J = 16.8$  Hz, 1H), 6.43 (d,  $J = 16.7$  Hz, 1H), 4.29 (q,  $J = 7.1$  Hz, 2H), 4.24 (q,  $J = 7.0$  Hz, 4H), 2.19 (t,  $J = 8.4$  Hz, 2H), 2.12 - 2.04 (m, 2H), 1.46 - 1.43 (m, 2H), 1.29 (t,  $J = 6.9$  Hz, 3H), 1.26 (t,  $J = 7.3$  Hz, 6H);  $^{19}\text{F}$  NMR (564 MHz,  $\text{CDCl}_3$ )  $\delta$  -105.86 (t,  $J = 17.3$  Hz, 2F);  $^{13}\text{C}$  NMR (150 MHz,  $\text{CDCl}_3$ )  $\delta$  169.96, 164.06 (t,  $J = 32.4$  Hz), 138.15, 134.54, 130.35, 129.79, 127.93, 127.37, 126.42, 124.79, 115.85 (t,  $J = 248.8$  Hz), 62.83, 61.82, 59.23, 34.88, 34.45 (t,  $J = 23.1$  Hz), 16.65, 13.99, 13.88; HRMS (ESI)  $m/z$  calcd for  $\text{C}_{22}\text{H}_{28}^{35}\text{ClF}_2\text{O}_6$  [ $\text{M}+\text{H}^+$ ] 461.1537, found 461.1523.

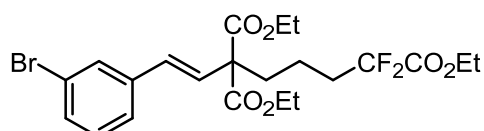

**triethyl (E)-7-(3-bromophenyl)-1,1-difluorohept-6-ene-1,5,5-tricarboxylate (3fa):**

Colorless oil, 65.5 mg, (65% yield).  $^1\text{H}$  NMR (600 MHz,  $\text{CDCl}_3$ )  $\delta$  7.55 (s, 1H), 7.38 (d,  $J = 7.6$  Hz, 1H), 7.32 (d,  $J = 7.7$  Hz, 1H), 7.19 (t,  $J = 7.9$  Hz, 1H), 6.73 (t,  $J = 16.6$  Hz, 1H), 6.42 (t,  $J = 16.7$  Hz, 1H), 4.29 (q,  $J = 7.2$  Hz, 2H), 4.24 (q,  $J = 7.3$  Hz, 4H), 2.18 (t,  $J = 6.0$  Hz, 2H), 2.11 - 2.05 (m, 2H), 1.47 - 1.41 (m, 2H), 1.29 (t,  $J = 7.3$  Hz, 3H), 1.26 (t,  $J = 7.1$  Hz, 6H);  $^{19}\text{F}$  NMR (564 MHz,  $\text{CDCl}_3$ )  $\delta$  -105.84 (t,  $J = 17.1$  Hz, 2F);  $^{13}\text{C}$  NMR (150 MHz,  $\text{CDCl}_3$ )  $\delta$  169.94, 164.04 (t,  $J = 32.5$  Hz), 138.40, 130.83, 130.23, 130.06, 129.32, 127.39, 125.39, 125.23, 122.73, 115.84 (t,  $J = 248.9$  Hz), 62.81, 61.81, 59.21, 34.86, 34.43 (t,  $J = 23.4$  Hz), 16.64, 13.98, 13.87; HRMS (ESI)  $m/z$  calcd for  $\text{C}_{22}\text{H}_{28}^{79}\text{BrF}_2\text{O}_6$  [ $\text{M}+\text{H}^+$ ] 505.1032, found 505.1025.

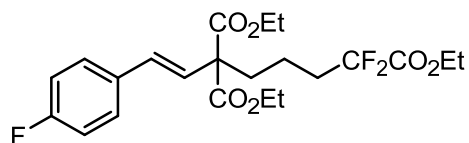

**triethyl (E)-1,1-difluoro-7-(4-fluorophenyl)hept-6-ene-1,5,5-tricarboxylate (3ga):**

Colorless oil, 64.8 mg, (73% yield). <sup>1</sup>H NMR (600 MHz, CDCl<sub>3</sub>) δ 7.38 - 7.36 (m, 2H), 7.01 (t, *J* = 8.7 Hz, 2H), 6.64 (d, *J* = 16.6 Hz, 1H), 6.44 (d, *J* = 16.6 Hz, 1H), 4.29 (q, *J* = 7.1 Hz, 2H), 4.25 - 4.21 (m, 4H), 2.18 (t, *J* = 8.3 Hz, 2H), 2.12 - 2.04 (m, 2H), 1.47 - 1.42 (m, 2H), 1.29 (t, *J* = 7.0 Hz, 3H), 1.26 (t, *J* = 7.0 Hz, 6H); <sup>19</sup>F NMR (564 MHz, CDCl<sub>3</sub>) δ -105.89 (t, *J* = 17.3 Hz, 2F) -113.66 (s, 1F); <sup>13</sup>C NMR (150 MHz, CDCl<sub>3</sub>) δ 170.14, 164.08 (t, *J* = 32.8 Hz), 163.34 (d, *J* = 246.1 Hz), 132.49 (d, *J* = 2.6 Hz), 130.43, 128.13 (d, *J* = 7.8 Hz), 125.48, 115.87 (t, *J* = 248.7 Hz), 115.56 (d, *J* = 21.5 Hz), 62.81, 61.75, 59.18, 34.90, 34.47 (t, *J* = 23.1 Hz), 16.64, 13.99, 13.87; HRMS (ESI) *m/z* calcd for C<sub>22</sub>H<sub>28</sub>F<sub>3</sub>O<sub>6</sub> [M+H<sup>+</sup>] 445.1832, found 445.1813.

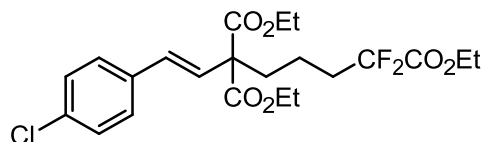**ethyl 5-(2-(4-chlorobenzoyl)phenyl)-2,2-difluoropentanoate (3ha):**

Colorless oil, 69.9 mg, (76% yield). <sup>1</sup>H NMR (600 MHz, CDCl<sub>3</sub>) δ 7.33 - 7.32 (m, 2H), 7.29 - 7.27 (m, 2H), 6.70 (d, *J* = 16.8 Hz, 1H), 6.43 (d, *J* = 16.6 Hz, 1H), 4.28 - 4.21 (m, 6H), 2.18 (t, *J* = 8.3 Hz, 2H), 2.12 - 2.04 (m, 2H), 1.46 - 1.41 (m, 2H), 1.28 (t, *J* = 7.4 Hz, 3H), 1.25 (t, *J* = 7.0 Hz, 6H); <sup>19</sup>F NMR (564 MHz, CDCl<sub>3</sub>) δ -105.88 (t, *J* = 17.2 Hz, 2F); <sup>13</sup>C NMR (150 MHz, CDCl<sub>3</sub>) δ 170.01, 164.04 (t, *J* = 32.4 Hz), 134.78, 133.63, 130.39, 128.69, 127.73, 126.43, 115.84 (t, *J* = 248.7 Hz), 62.79, 61.76, 59.20, 34.85, 34.43 (t, *J* = 23.1 Hz), 16.63, 13.96, 13.85; HRMS (ESI) *m/z* calcd for C<sub>22</sub>H<sub>27</sub><sup>35</sup>ClF<sub>2</sub>O<sub>6</sub>Na [M+Na<sup>+</sup>] 483.1356, found 483.1364.

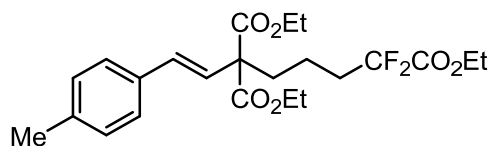**triethyl (E)-1,1-difluoro-7-(p-tolyl)hept-6-ene-1,5,5-tricarboxylate (3ia):**

Colorless oil, 72.1 mg, (82% yield). <sup>1</sup>H NMR (600 MHz, CDCl<sub>3</sub>) δ 7.31 (d, *J* = 8.0 Hz, 2H), 7.14 (t, *J* = 7.9 Hz, 2H), 6.68 (d, *J* = 16.7 Hz, 1H), 6.45 (d, *J* = 16.6 Hz, 1H), 4.29 (q, *J* = 7.1 Hz, 2H), 4.24 - 4.20 (m, 4H), 2.34 (s, 3H), 2.19 (t, *J* = 8.4 Hz, 2H), 2.12 - 2.04 (m, 2H), 1.48 - 1.42 (m, 2H), 1.29 (t, *J* = 7.0 Hz, 3H), 1.26 (t, *J* = 7.2 Hz, 6H); <sup>19</sup>F NMR (564 MHz, CDCl<sub>3</sub>) δ -105.87 (t, *J* = 17.3 Hz, 2F); <sup>13</sup>C NMR (150 MHz, CDCl<sub>3</sub>) δ 170.26, 164.08 (t, *J* = 32.8 Hz), 137.88, 133.54, 131.39, 129.22, 126.42, 124.62, 115.87 (t, *J* = 248.8 Hz), 62.77, 61.64, 59.17, 34.95, 34.50 (t, *J* = 23.1 Hz), 21.16, 16.62, 13.97, 13.86; HRMS (ESI) *m/z* calcd for C<sub>23</sub>H<sub>31</sub>F<sub>2</sub>O<sub>6</sub> [M+H<sup>+</sup>] 441.2083, found 441.2084.

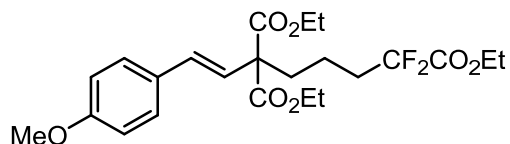**triethyl (E)-1,1-difluoro-7-(4-methoxyphenyl)hept-6-ene-1,5,5-tricarboxylate (3ja):**

Colorless oil, 71.1 mg, (78% yield). <sup>1</sup>H NMR (600 MHz, CDCl<sub>3</sub>) δ 7.35 (d, *J* = 8.8 Hz, 2H), 6.86 (d, *J* = 8.6 Hz, 2H), 6.58 (d, *J* = 16.6 Hz, 1H), 6.42 (d, *J* = 16.6 Hz, 1H), 4.29 (q, *J* = 7.3 Hz, 2H), 4.24 - 4.20 (m, 4H), 3.81 (s, 3H), 2.18 (t, *J* = 8.5 Hz, 2H), 2.12 - 2.04 (m, 2H), 1.47 - 1.42 (m, 2H), 1.29 (t, *J* = 7.0 Hz, 3H), 1.25 (t, *J* = 7.0 Hz, 6H); <sup>19</sup>F NMR (564 MHz, CDCl<sub>3</sub>) δ -105.87 (t, *J* = 15.9 Hz, 2F); <sup>13</sup>C NMR (150 MHz, CDCl<sub>3</sub>) δ 170.34, 164.10 (t, *J* = 32.9 Hz), 159.48, 130.96,

129.11, 127.75, 123.36, 115.90 (t,  $J = 248.9$ Hz), 113.94, 62.79, 61.65, 59.15, 55.29, 34.95, 34.51 (t,  $J = 23.0$  Hz), 16.63, 14.00, 13.87; HRMS (ESI)  $m/z$  calcd for  $C_{23}H_{31}F_2O_7$  [ $M+H^+$ ] 457.2032, found 457.2030.

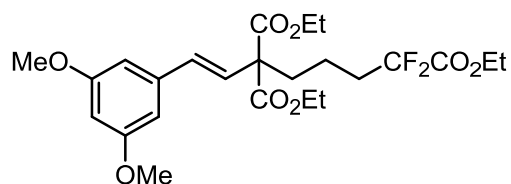

**triethyl (E)-7-(3,5-dimethoxyphenyl)-1,1-difluorohept-6-ene-1,5,5-tricarboxylate (3ka):**

Colorless oil, 68.0 mg, (70% yield).  $^1H$  NMR (600 MHz,  $CDCl_3$ )  $\delta$  6.96 (d,  $J = 1.9$  Hz, 1H), 6.93 (dd,  $J_1 = 8.2$  Hz,  $J_2 = 1.9$  Hz, 1H), 6.82 (d,  $J = 8.3$  Hz, 1H), 6.59 (d,  $J = 16.6$  Hz, 1H), 6.41 (d,  $J = 16.6$  Hz, 1H), 4.28 - 4.20 (m, 6H), 3.91 (s, 3H), 3.87 (s, 3H), 2.19 (t,  $J = 8.4$  Hz, 2H), 2.12 - 2.04 (m, 2H), 1.46 - 1.43 (m, 2H), 1.28 (t,  $J = 7.3$  Hz, 3H), 1.25 (t,  $J = 7.1$  Hz, 6H);  $^{19}F$  NMR (564 MHz,  $CDCl_3$ )  $\delta$  -105.87 (t,  $J = 17.2$  Hz, 2F);  $^{13}C$  NMR (150 MHz,  $CDCl_3$ )  $\delta$  170.31, 164.07 (t,  $J = 32.0$  Hz), 149.06, 148.96, 131.29, 129.34, 123.45, 119.90, 115.87 (t,  $J = 248.8$  Hz), 110.89, 108.60, 62.78, 61.67, 59.08, 55.88, 55.83, 34.96, 34.47 (t,  $J = 23.0$  Hz), 16.61, 13.98, 13.85; HRMS (ESI)  $m/z$  calcd for  $C_{24}H_{33}F_2O_8$  [ $M+H^+$ ] 487.2138, found 487.2117.

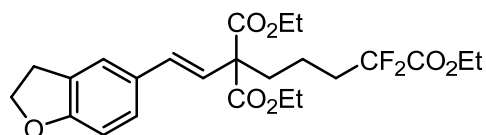

**triethyl (E)-7-(2,3-dihydrobenzofuran-5-yl)-1,1-difluorohept-6-ene-1,5,5-tricarboxylate (3la):**

Colorless oil, 67.4 mg, (72% yield).  $^1H$  NMR (600 MHz,  $CDCl_3$ )  $\delta$  7.31 (s, 1H), 7.13 (d,  $J = 8.2$  Hz, 1H), 6.73 (d,  $J = 8.2$  Hz, 1H), 6.54 (d,  $J = 16.6$  Hz, 1H), 6.40 (d,  $J = 16.6$  Hz, 1H), 4.57 (t,  $J = 8.6$  Hz, 2H), 4.29 (q,  $J = 7.3$  Hz, 2H), 4.23 (q,  $J = 7.2$  Hz, 4H), 3.19 (t,  $J = 8.7$  Hz, 2H), 2.17 (t,  $J = 8.4$  Hz, 2H), 2.12 - 2.03 (m, 2H), 1.47 - 1.41 (m, 2H), 1.29 (t,  $J = 7.0$  Hz, 3H), 1.25 (t,  $J = 7.1$  Hz, 6H);  $^{19}F$  NMR (564 MHz,  $CDCl_3$ )  $\delta$  -105.90 (t,  $J = 16.8$  Hz, 2F);  $^{13}C$  NMR (150 MHz,  $CDCl_3$ )  $\delta$  170.36, 164.09 (t,  $J = 32.8$  Hz), 160.12, 131.30, 129.17, 127.51, 127.19, 122.67, 122.64, 115.88 (t,  $J = 248.9$  Hz), 109.14, 71.46, 62.77, 61.60, 59.09, 34.95, 34.50 (t,  $J = 23.1$  Hz), 29.46, 16.60, 13.98, 13.87; HRMS (ESI)  $m/z$  calcd for  $C_{24}H_{31}F_2O_7$  [ $M+H^+$ ] 469.2032, found 469.2022.

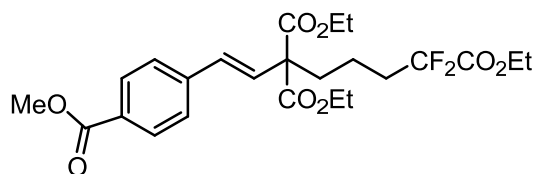

**triethyl (E)-1,1-difluoro-7-(4-(methoxycarbonyl)phenyl)hept-6-ene-1,5,5-tricarboxylate (3ma):**

Colorless oil, 66.0 mg, (67% yield).  $^1H$  NMR (600 MHz,  $CDCl_3$ )  $\delta$  7.99 (d,  $J = 8.3$  Hz, 2H), 7.46 (d,  $J = 8.3$  Hz, 2H), 6.84 (d,  $J = 16.6$  Hz, 1H), 6.52 (d,  $J = 16.6$  Hz, 1H), 4.28 - 4.20 (m, 6H), 3.90 (s, 3H), 2.21 (t,  $J = 17.0$  Hz, 2H), 2.12 - 2.04 (m, 2H), 1.47 - 1.42 (m, 2H), 1.28 - 1.24 (m, 9H);  $^{19}F$  NMR (564 MHz,  $CDCl_3$ )  $\delta$  -105.84 (t,  $J = 14.7$  Hz, 2F);  $^{13}C$  NMR (150 MHz,  $CDCl_3$ )  $\delta$  169.89, 166.72, 164.24 (t,  $J = 32.8$  Hz), 140.68, 130.73, 129.87, 129.36, 128.50, 125.42, 117.48 (t,  $J = 249.3$  Hz), 62.80, 61.83, 59.33, 52.07, 34.84, 34.56 (t,  $J = 23.1$  Hz), 16.65, 13.96, 13.84; HRMS (ESI)  $m/z$  calcd for  $C_{24}H_{30}F_2O_8Na$  [ $M+Na^+$ ] 507.1801, found 507.1811.



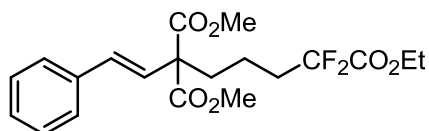

**1-ethyl 5,5-dimethyl (E)-1,1-difluoro-7-phenylhept-6-ene-1,5,5-tricarboxylate (3na):**

Colorless oil, 54.9 mg, (69% yield).  $^1\text{H}$  NMR (600 MHz,  $\text{CDCl}_3$ )  $\delta$  7.42 - 7.40 (m, 2H), 7.33 (t,  $J = 7.3$  Hz, 2H), 7.26 (t,  $J = 5.6$  Hz, 1H), 6.71 (d,  $J = 16.6$  Hz, 1H), 6.48 (d,  $J = 16.7$  Hz, 1H), 4.29 (q,  $J = 7.3$  Hz, 2H), 3.77 (s, 6H), 2.20 (t,  $J = 8.5$  Hz, 2H), 2.11 - 2.04 (m, 2H), 1.47 - 1.42 (m, 2H), 1.29 (t,  $J = 7.3$  Hz, 3H);  $^{19}\text{F}$  NMR (564 MHz,  $\text{CDCl}_3$ )  $\delta$  -105.83 (t,  $J = 17.3$  Hz, 2F);  $^{13}\text{C}$  NMR (150 MHz,  $\text{CDCl}_3$ )  $\delta$  170.65, 164.08 (t,  $J = 25.9$  Hz), 136.14, 131.76, 128.59, 128.10, 126.57, 125.43, 115.86 (t,  $J = 249.1$  Hz), 62.82, 59.27, 52.90, 34.96, 34.45 (t,  $J = 23.2$  Hz), 16.69, 13.88; HRMS (ESI)  $m/z$  calcd for  $\text{C}_{20}\text{H}_{25}\text{F}_2\text{O}_6$  [ $\text{M}+\text{H}^+$ ] 399.1614, found 399.1604.

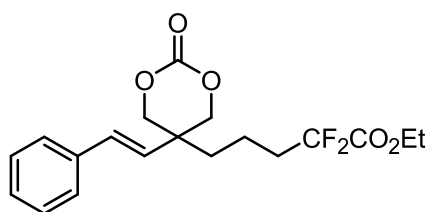

**ethyl (E)-2,2-difluoro-5-(2-oxo-5-styryl-1,3-dioxan-5-yl)pentanoate (3oa):**

Colorless oil, 49.3 mg, (67% yield).  $^1\text{H}$  NMR (600 MHz,  $\text{CDCl}_3$ )  $\delta$  7.38 - 7.33 (m, 4H), 7.30 - 7.28 (m, 1H), 6.57 (d,  $J = 16.6$  Hz, 1H), 5.97 (d,  $J = 16.6$  Hz, 1H), 4.43 (d,  $J = 10.9$  Hz, 2H), 4.30 - 4.27 (m, 4H), 2.12 - 2.04 (m, 2H), 1.65 - 1.62 (m, 2H), 1.56 - 1.51 (m, 2H), 1.30 (t,  $J = 7.0$  Hz, 3H);  $^{19}\text{F}$  NMR (564 MHz,  $\text{CDCl}_3$ )  $\delta$  -105.73 (t,  $J = 17.4$  Hz, 2F);  $^{13}\text{C}$  NMR (150 MHz,  $\text{CDCl}_3$ )  $\delta$  163.93 (t,  $J = 32.1$  Hz), 147.68, 135.55, 133.16, 128.72, 128.46, 126.40, 125.85, 115.69 (t,  $J = 249.0$  Hz), 73.98, 62.99, 37.25, 34.35 (t,  $J = 23.4$  Hz), 32.78, 15.80, 13.88; HRMS (ESI)  $m/z$  calcd for  $\text{C}_{19}\text{H}_{22}\text{F}_2\text{O}_5\text{Na}$  [ $\text{M}+\text{Na}^+$ ] 391.1328, found 391.1316.

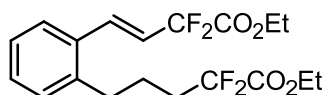

**ethyl (E)-5-(2-(4-ethoxy-3,3-difluoro-4-oxobut-1-en-1-yl)phenyl)-2,2-difluoropentanoate**

**(3pa):** Colorless oil, 48.4 mg, (62% yield).  $^1\text{H}$  NMR (600 MHz,  $\text{CDCl}_3$ )  $\delta$  7.49 (d,  $J = 7.6$  Hz, 1H), 7.35 - 7.31 (m, 2H), 7.26 - 7.23 (m, 1H), 7.18 (d,  $J = 7.0$  Hz, 1H), 6.25 (dt,  $J_1 = 22.7$  Hz,  $J_2 = 11.2$  Hz, 1H), 4.38 (q,  $J = 7.1$  Hz, 2H), 4.33 (q,  $J = 7.1$  Hz, 2H), 2.77 (t,  $J = 7.7$  Hz, 2H), 2.13 - 2.07 (m, 2H), 1.78 - 1.74 (m, 2H), 1.37 (t,  $J = 7.1$  Hz, 3H), 1.33 (t,  $J = 7.1$  Hz, 3H);  $^{19}\text{F}$  NMR (564 MHz,  $\text{CDCl}_3$ )  $\delta$  -106.19 (d,  $J = 12.3$  Hz, 2F), -105.84 (t,  $J = 14.3$  Hz, 2F);  $^{13}\text{C}$  NMR (150 MHz,  $\text{CDCl}_3$ )  $\delta$  164.14 (t,  $J = 32.9$  Hz), 163.84 (t,  $J = 34.8$  Hz), 139.63, 134.12 (t,  $J = 9.5$  Hz), 132.86, 129.81, 129.59, 126.91, 126.59, 120.80 (t,  $J = 24.8$  Hz), 116.04 (t,  $J = 248.6$  Hz), 112.58 (t,  $J = 248.0$  Hz), 63.18, 62.85, 33.84 (t,  $J = 23.2$  Hz), 22.79, 13.93, 13.92; HRMS (ESI)  $m/z$  calcd for  $\text{C}_{19}\text{H}_{22}\text{F}_4\text{O}_4\text{Na}$  [ $\text{M}+\text{Na}^+$ ] 413.1346, found 413.1333.

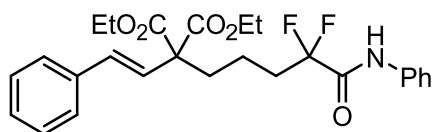

**diethyl (E)-2-(4,4-difluoro-5-oxo-5-(phenylamino)pentyl)-2-styrylmalonate (3ab):**

Colorless oil, 42.3 mg, (45% yield).  $^1\text{H}$  NMR (600 MHz,  $\text{CDCl}_3$ )  $\delta$  7.92 (br, 1H), 7.53 (d,  $J = 7.7$  Hz, 2H), 7.40 (d,  $J = 7.5$  Hz, 2H), 7.36 - 7.30(m, 4H), 7.27 - 7.26 (m, 1H), 7.18 (t,  $J = 7.6$  Hz, 1H), 6.73 (d,  $J = 16.6$  Hz, 1H), 6.49 (d,  $J = 16.6$  Hz, 1H), 4.24 - 4.20 (m, 4H), 2.25 - 2.18 (m, 4H), 1.54 - 1.49 (m, 2H), 1.25 (t,  $J = 7.0$  Hz, 6H);  $^{19}\text{F}$  NMR (564 MHz,  $\text{CDCl}_3$ )  $\delta$  -105.43 (d,  $J = 17.3$  Hz, 2F);  $^{13}\text{C}$  NMR (150 MHz,  $\text{CDCl}_3$ )  $\delta$  170.24, 161.84 (t,  $J = 28.1$  Hz), 136.32, 135.84, 131.63, 129.18, 128.58, 127.99, 126.58, 125.76, 125.56, 120.18, 118.00 (t,  $J = 252.3$  Hz), 61.74, 59.26, 34.96, 33.73 (t,  $J = 23.0$  Hz), 16.76, 14.01; HRMS (ESI)  $m/z$  calcd for  $\text{C}_{26}\text{H}_{30}\text{F}_2\text{NO}_5$  [ $\text{M}+\text{H}^+$ ] 474.2087, found 474.2073.

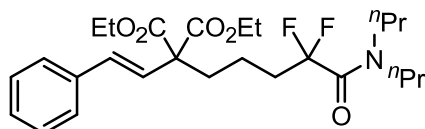**diethyl (E)-2-(5-(dipropylamino)-4,4-difluoro-5-oxopentyl)-2-styrylmalonate (3ac):**

Colorless oil, 52.9 mg, (55% yield).  $^1\text{H}$  NMR (600 MHz,  $\text{CDCl}_3$ )  $\delta$  7.42 (d,  $J = 7.6$  Hz, 2H), 7.32 (t,  $J = 7.5$  Hz, 2H), 7.25 (t,  $J = 7.4$  Hz, 1H), 6.75 (d,  $J = 16.6$  Hz, 1H), 6.50 (d,  $J = 16.6$  Hz, 1H), 4.26 - 4.20 (m, 4H), 3.34 (t,  $J = 7.9$  Hz, 2H), 3.24 (t,  $J = 7.6$  Hz, 2H), 2.22 (t,  $J = 8.5$  Hz, 2H), 2.17 - 2.13 (m, 2H), 1.60 - 1.52 (m, 4H), 1.51 - 1.47 (m, 2H), 1.26 (t,  $J = 7.3$  Hz, 6H), 0.88 - 0.85 (m, 6H);  $^{19}\text{F}$  NMR (564 MHz,  $\text{CDCl}_3$ )  $\delta$  -99.92 (t,  $J = 18.3$  Hz, 2F);  $^{13}\text{C}$  NMR (150 MHz,  $\text{CDCl}_3$ )  $\delta$  170.33, 162.95 (t,  $J = 28.8$  Hz), 136.46, 131.45, 128.50, 127.86, 126.55, 125.91, 119.34 (t,  $J = 253.1$  Hz), 61.60, 59.35, 49.08, 48.47, 35.12, 34.86 (t,  $J = 23.5$  Hz), 22.11, 20.18, 16.66, 13.98, 11.22, 10.93; HRMS (ESI)  $m/z$  calcd for  $\text{C}_{26}\text{H}_{38}\text{F}_2\text{NO}_5$  [ $\text{M}+\text{H}^+$ ] 482.2713, found 482.2709.

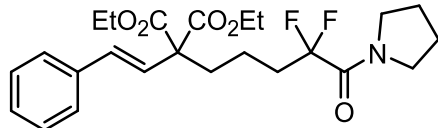**diethyl (E)-2-(4,4-difluoro-5-oxo-5-(pyrrolidin-1-yl)pentyl)-2-styrylmalonate (3ad):**

Colorless oil, 55.9 mg, (62% yield).  $^1\text{H}$  NMR (600 MHz,  $\text{CDCl}_3$ )  $\delta$  7.42 (d,  $J = 5.3$  Hz, 2H), 7.32 (t,  $J = 7.5$  Hz, 2H), 7.26 - 7.24 (m, 1H), 6.74 (d,  $J = 16.6$  Hz, 1H), 6.50 (d,  $J = 16.6$  Hz, 1H), 4.26 - 4.20 (m, 4H), 3.64 (t,  $J = 6.7$  Hz, 2H), 3.47 (t,  $J = 7.0$  Hz, 2H), 2.22 (t,  $J = 8.5$  Hz, 2H), 2.16 - 2.12 (m, 2H), 1.94 - 1.90 (m, 2H), 1.84 - 1.81 (m, 2H), 1.52 - 1.46 (m, 2H), 1.26 (t,  $J = 7.0$  Hz, 6H);  $^{19}\text{F}$  NMR (564 MHz,  $\text{CDCl}_3$ )  $\delta$  -103.43 (t,  $J = 18.7$  Hz, 2F);  $^{13}\text{C}$  NMR (150 MHz,  $\text{CDCl}_3$ )  $\delta$  170.32, 162.04 (t,  $J = 29.8$  Hz), 136.44, 131.47, 128.51, 127.88, 126.55, 125.91, 118.77 (t,  $J = 251.6$  Hz), 61.62, 59.35, 47.28, 46.51, 35.10, 34.24 (t,  $J = 23.0$  Hz), 26.44, 23.22, 16.61, 13.99; HRMS (ESI)  $m/z$  calcd for  $\text{C}_{24}\text{H}_{32}\text{F}_2\text{NO}_5$  [ $\text{M}+\text{H}^+$ ] 452.2243, found 452.2244.

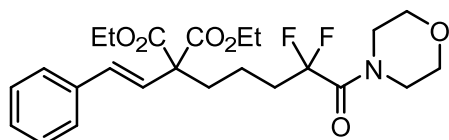**diethyl (E)-2-(4,4-difluoro-5-morpholino-5-oxopentyl)-2-styrylmalonate (3ae):**

Colorless oil, 55.1 mg, (59% yield).  $^1\text{H}$  NMR (600 MHz,  $\text{CDCl}_3$ )  $\delta$  7.42 (d,  $J = 7.6$  Hz, 2H), 7.32 (t,  $J = 7.5$  Hz, 2H), 7.27 - 7.24 (m, 1H), 6.75 (d,  $J = 16.6$  Hz, 1H), 6.50 (d,  $J = 16.6$  Hz, 1H), 4.25 - 4.20 (m, 4H), 3.70 - 3.66 (m, 6H), 3.61 (t,  $J = 4.9$  Hz, 2H), 2.22 (t,  $J = 8.5$  Hz, 2H), 2.17 - 2.12 (m, 2H), 1.54 - 1.48 (m, 2H), 1.26 (t,  $J = 7.0$  Hz, 6H);  $^{19}\text{F}$  NMR (564 MHz,  $\text{CDCl}_3$ )  $\delta$  -99.53 (t,  $J = 9.7$

Hz, 2F);  $^{13}\text{C}$  NMR (150 MHz,  $\text{CDCl}_3$ )  $\delta$  170.31, 161.80 (t,  $J = 29.5$  Hz), 136.44, 131.51, 128.54, 127.92, 126.56, 125.90, 119.22 (t,  $J = 252.7$  Hz), 66.75, 66.68, 61.65, 59.35, 46.44, 43.25, 35.13, 34.61 (t,  $J = 22.9$  Hz), 16.62, 14.01; HRMS (ESI)  $m/z$  calcd for  $\text{C}_{24}\text{H}_{32}\text{F}_2\text{NO}_6$  [ $\text{M}+\text{H}^+$ ] 468.2192, found 468.2191.

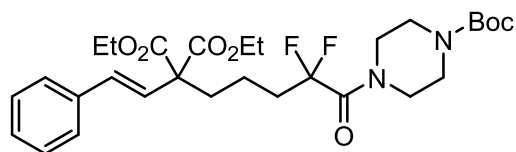

**diethyl (E)-2-(5-(4-(tert-butoxycarbonyl)piperazin-1-yl)-4,4-difluoro-5-oxopentyl)-2-styrylmalonate (3af):**

Colorless oil, 63.3 mg, (56% yield).  $^1\text{H}$  NMR (600 MHz,  $\text{CDCl}_3$ )  $\delta$  7.42 (d,  $J = 7.4$  Hz, 2H), 7.32 (d,  $J = 7.4$  Hz, 2H), 7.26 - 7.24 (m, 1H), 6.74 (d,  $J = 16.6$  Hz, 1H), 6.50 (d,  $J = 16.6$  Hz, 1H), 4.26 - 4.20 (m, 4H), 3.64 (s, 2H), 3.56 (s, 2H), 3.43 (s, 4H), 2.22 (d,  $J = 5.1$  Hz, 2H), 2.17 - 2.13 (m, 2H), 1.51 - 1.48 (m, 2H), 1.46 (s, 9H), 1.26 (t,  $J = 7.0$  Hz, 6H);  $^{19}\text{F}$  NMR (564 MHz,  $\text{CDCl}_3$ )  $\delta$  -99.39 (t,  $J = 17.3$  Hz, 2F);  $^{13}\text{C}$  NMR (150 MHz,  $\text{CDCl}_3$ )  $\delta$  170.30, 161.89 (t,  $J = 28.5$  Hz), 154.40, 136.42, 131.50, 128.53, 127.91, 126.54, 125.88, 119.20 (t,  $J = 253.1$  Hz), 80.37, 61.64, 59.33, 45.60, 42.87, 35.11, 34.60 (t,  $J = 22.8$  Hz), 28.31, 16.61, 14.00; HRMS (ESI)  $m/z$  calcd for  $\text{C}_{29}\text{H}_{41}\text{F}_2\text{N}_2\text{O}_7$  [ $\text{M}+\text{H}^+$ ] 567.2876, found 567.2877.

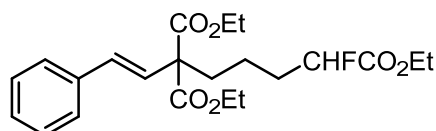

**triethyl (E)-1-fluoro-7-phenylhept-6-ene-1,5,5-tricarboxylate (3ag):**

Colorless oil, 35.1 mg, (43% yield).  $^1\text{H}$  NMR (600 MHz,  $\text{CDCl}_3$ )  $\delta$  7.41 (d,  $J = 7.4$  Hz, 2H), 7.33 (d,  $J = 7.5$  Hz, 2H), 7.27 - 7.25 (m, 1H), 6.75 (d,  $J = 16.6$  Hz, 1H), 6.49 (d,  $J = 16.6$  Hz, 1H), 4.92 - 4.81 (m, 1H), 3.24 - 4.21 (m, 6H), 2.22 - 2.16 (m, 2H), 1.94 - 1.87 (m, 2H), 1.47 - 1.42 (m, 2H), 1.26 (t,  $J = 7.1$  Hz, 9H);  $^{19}\text{F}$  NMR (564 MHz,  $\text{CDCl}_3$ )  $\delta$  -199.13 - -192.31 (m, 1F);  $^{13}\text{C}$  NMR (150 MHz,  $\text{CDCl}_3$ )  $\delta$  170.33 (d,  $J = 2.1$  Hz), 169.83 (d,  $J = 23.5$  Hz), 136.37, 131.44, 128.56, 127.96, 126.54, 125.94, 89.07 (t,  $J = 183.3$  Hz), 61.67, 61.48, 59.25, 34.97, 32.58 (t,  $J = 21.2$  Hz), 19.47, 14.10, 14.02; HRMS (ESI)  $m/z$  calcd for  $\text{C}_{22}\text{H}_{30}\text{FO}_6$  [ $\text{M}+\text{H}^+$ ] 409.2021, found 409.2007.

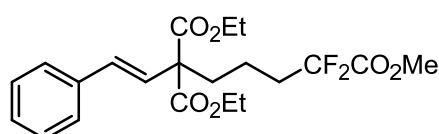

**5,5-diethyl 1-methyl (E)-1,1-difluoro-7-phenylhept-6-ene-1,5,5-tricarboxylate (3ah):**

Colorless oil, 62.6 mg, (76% yield).  $^1\text{H}$  NMR (600 MHz,  $\text{CDCl}_3$ )  $\delta$  7.42 (d,  $J = 7.3$  Hz, 2H), 7.33 (d,  $J = 7.5$  Hz, 2H), 7.28 - 7.25 (m, 1H), 6.73 (d,  $J = 16.7$  Hz, 1H), 6.49 (d,  $J = 16.7$  Hz, 1H), 4.25 (q,  $J = 7.0$  Hz, 4H), 3.82 (s, 3H), 2.20 (t,  $J = 8.3$  Hz, 2H), 2.13 - 2.05 (s, 2H), 1.48 - 1.45 (m, 2H), 1.26 (t,  $J = 7.3$  Hz, 6H);  $^{19}\text{F}$  NMR (564 MHz,  $\text{CDCl}_3$ )  $\delta$  -105.60 (t,  $J = 17.3$  Hz, 2F);  $^{13}\text{C}$  NMR (150 MHz,  $\text{CDCl}_3$ )  $\delta$  170.18, 164.57 (t,  $J = 32.8$  Hz), 136.30, 131.58, 128.57, 128.00, 126.54, 125.71, 115.92 (t,  $J = 249.2$  Hz), 61.72, 59.21, 53.28, 34.90, 34.49 (t,  $J = 23.1$  Hz), 16.60, 13.99; HRMS (ESI)  $m/z$  calcd for  $\text{C}_{21}\text{H}_{27}\text{F}_2\text{O}_6$  [ $\text{M}+\text{H}^+$ ] 413.1770, found 413.1766.

## 5. Control experiments

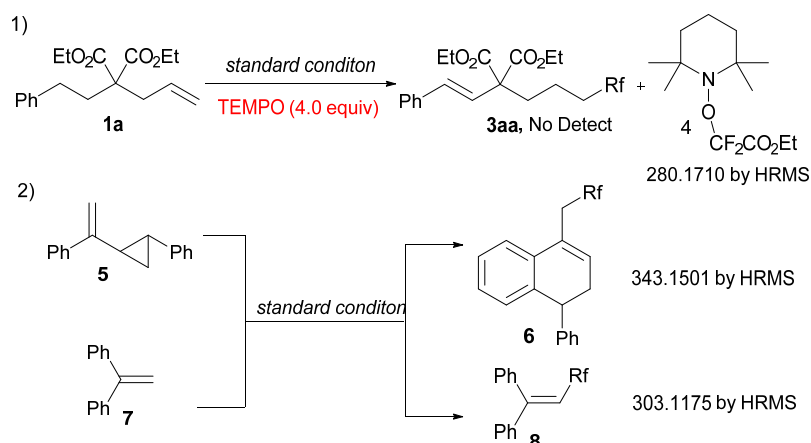

To an oven-dried 10 mL Schlenk tube was added Pd(PPh<sub>3</sub>)<sub>2</sub>Cl<sub>2</sub> (5 mol%) and Xantphos (10 mol%), and K<sub>2</sub>CO<sub>3</sub> (2.0 equiv). The tube was evacuated and back-filled with nitrogen (this process was repeated three times), alkene (0.2 mmol), alkyl bromide (0.3 mmol), Tempo (1.2 mmol) and CH<sub>3</sub>CN (2.0 mL) was added subsequently via syringe. The resulting mixture was stirred at 80 °C for 24 hours. The mixture was determined by HRMS. HRMS (ESI) m/z calcd for C<sub>13</sub>H<sub>24</sub>F<sub>2</sub>NO<sub>3</sub> [M+H<sup>+</sup>] 280.1723, found 280.1710.

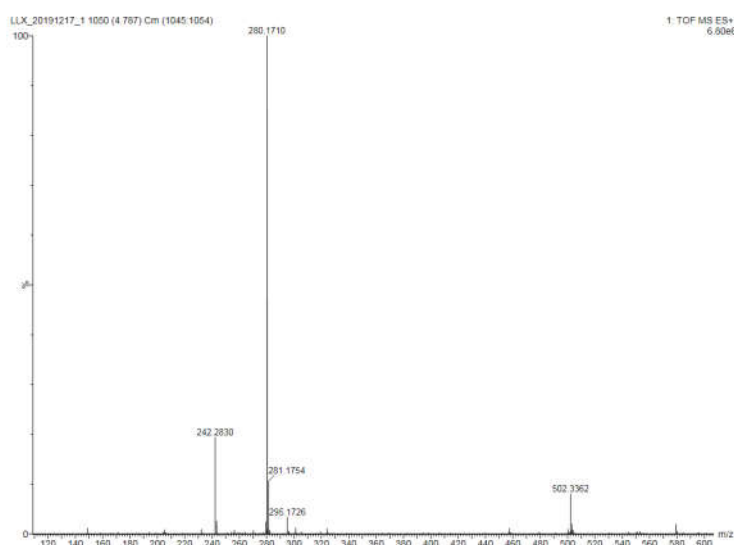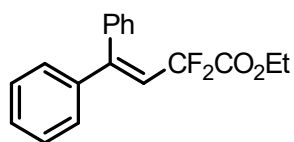

### ethyl 2,2-difluoro-4,4-diphenylbut-3-enoate (5):

Colorless oil. <sup>1</sup>H NMR (600 MHz, CDCl<sub>3</sub>) δ 7.37 – 7.36 (m, 6H), 7.33 – 7.31 (m, 2H), 7.25 – 7.19 (m, 2H), 6.26 (t, *J* = 11.9 Hz, 1H), 3.91 (q, *J* = 7.2 Hz, 2H), 1.17 (t, *J* = 7.2 Hz, 3H); <sup>19</sup>F NMR (564 MHz, CDCl<sub>3</sub>) δ -90.78 (d, *J* = 12.1 Hz, 2F); <sup>13</sup>C NMR (150 MHz, CDCl<sub>3</sub>) δ 163.42 (t, *J* = 33.3 Hz), 150.95 (t, *J* = 37.0 Hz), 140.42, 137.02, 128.36, 127.97, 127.87, 119.45 (t, *J* = 28.3 Hz), 112.51 (t, *J* = 243.7 Hz), 62.73, 13.65. HRMS (ESI) m/z calcd for C<sub>18</sub>H<sub>27</sub>F<sub>2</sub>NO<sub>2</sub> [M+H<sup>+</sup>] 303.1191, found 303.1175.

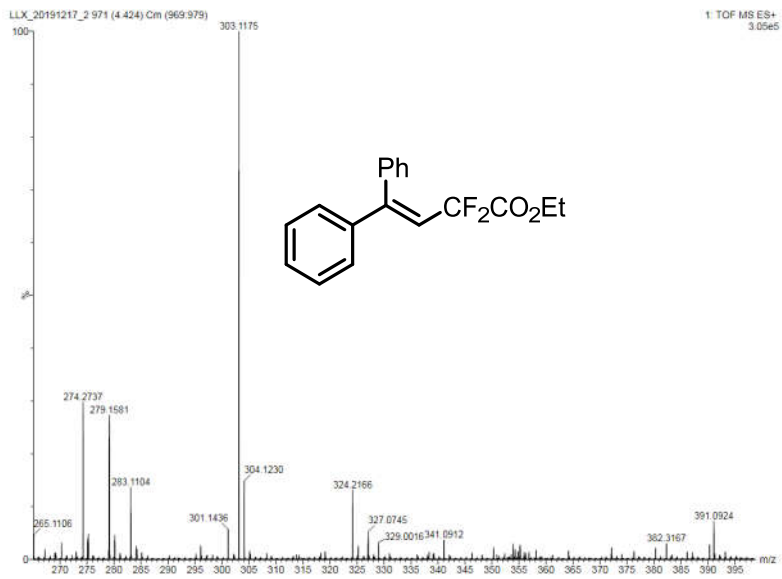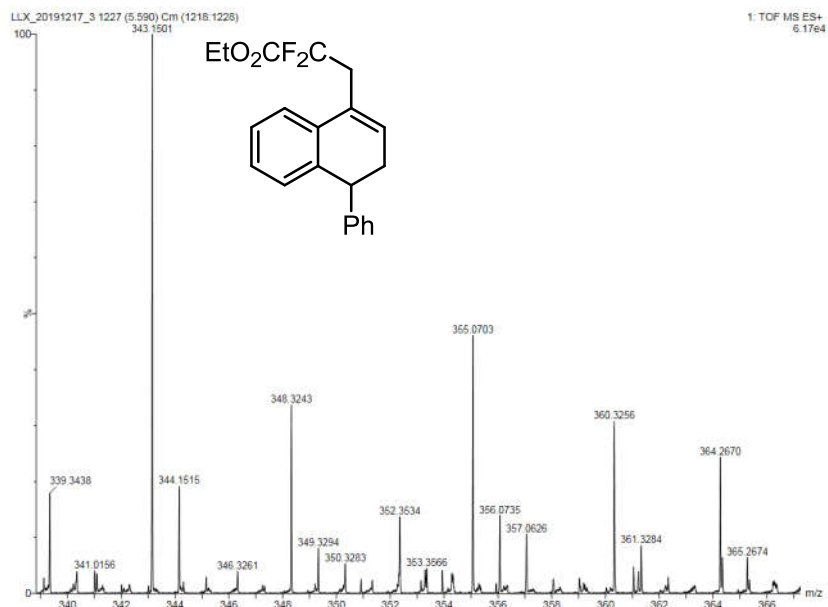

## 6. Spectra of new compounds

LX-3-111  
single\_pulse

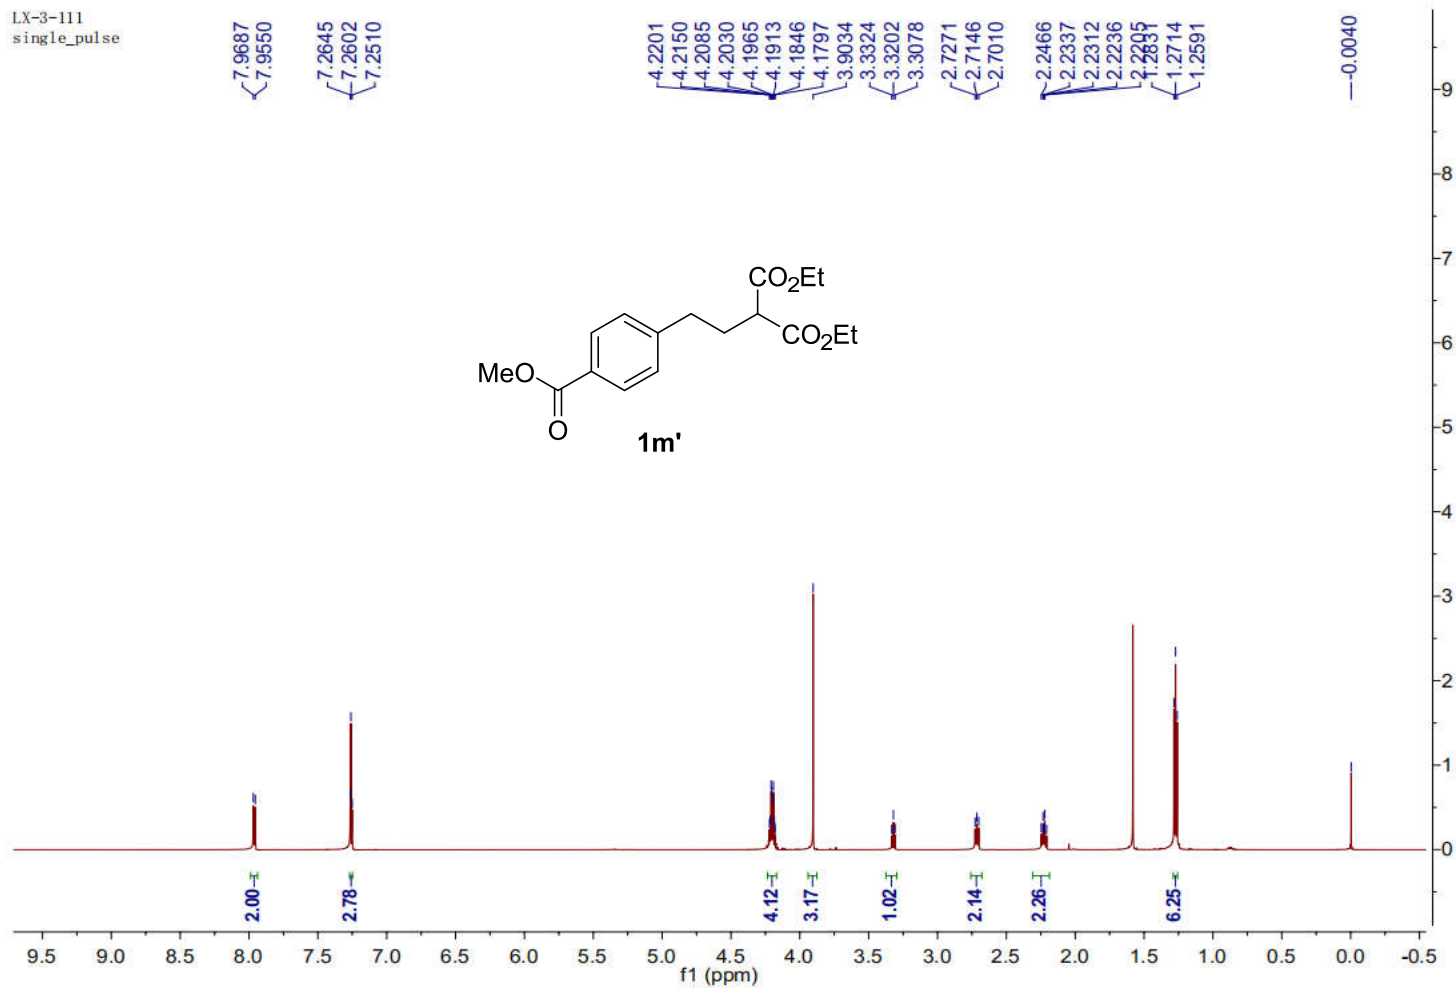

LX-3-111

single pulse decoupled gated NOE

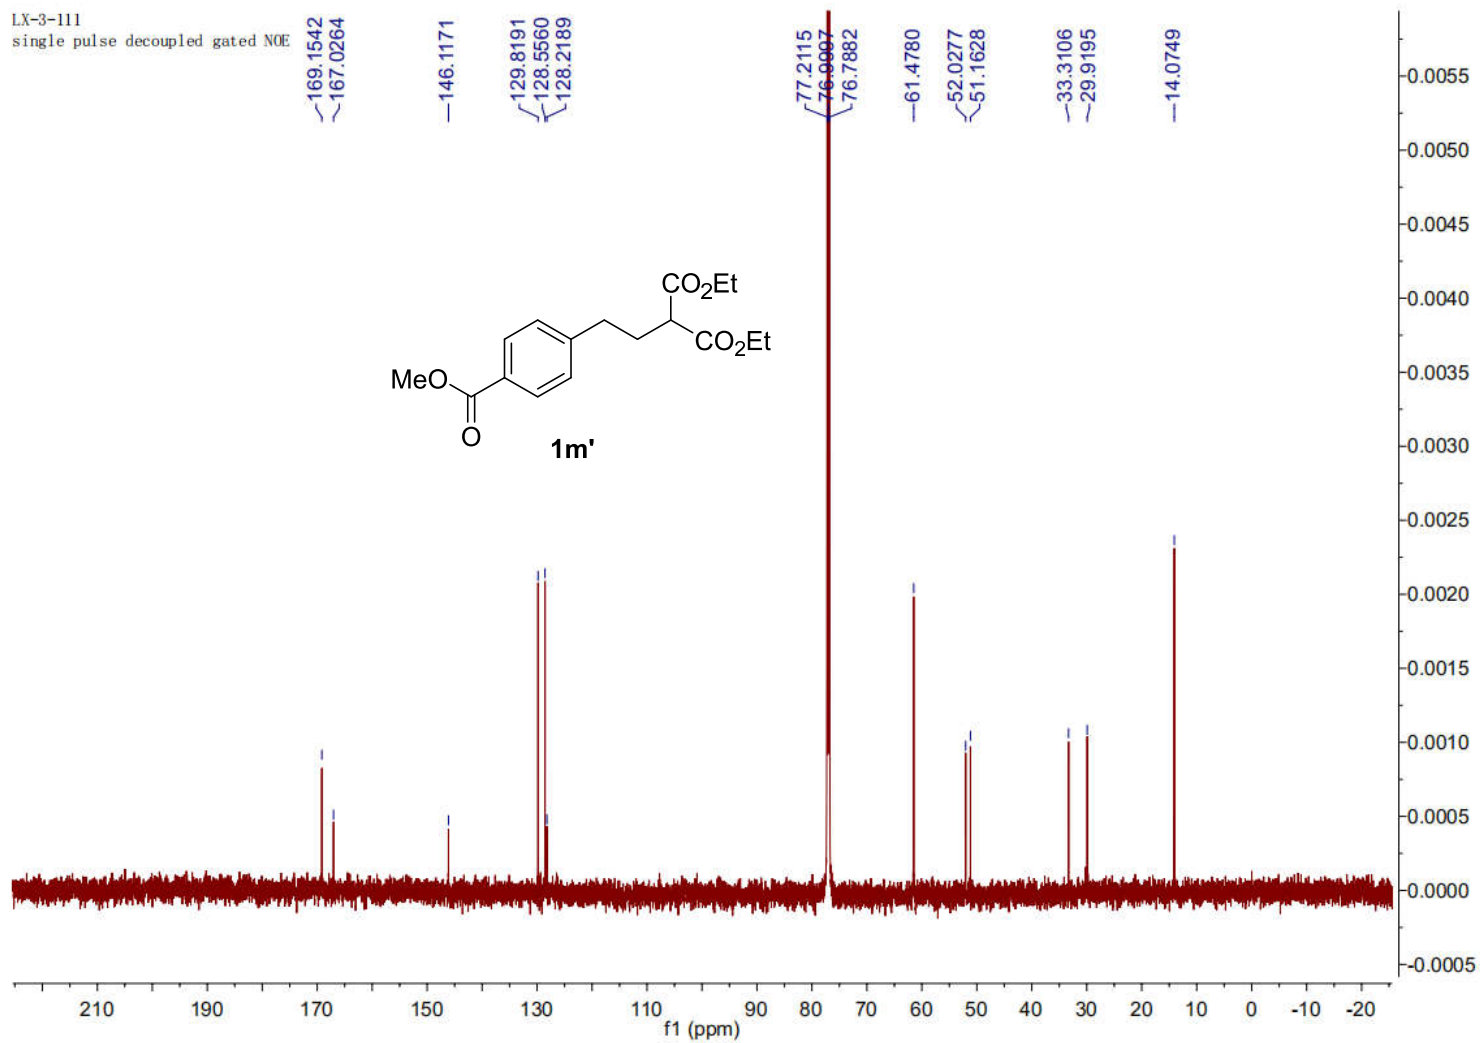

LX-3-112  
single\_pulse

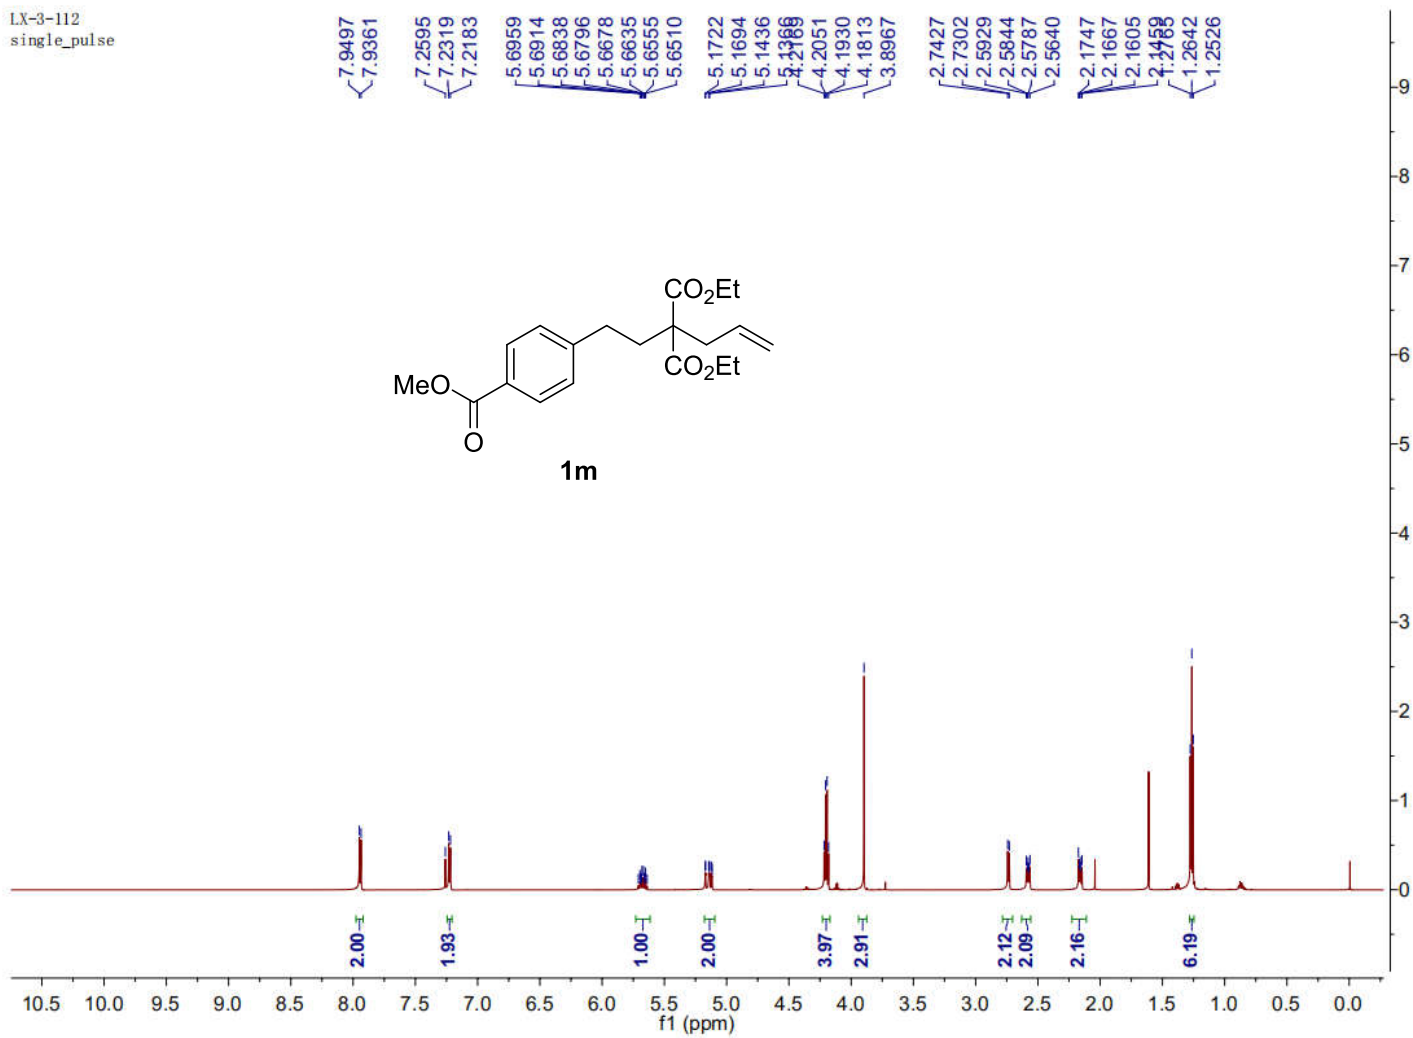



LX-3-112

single pulse decoupled gated NOE

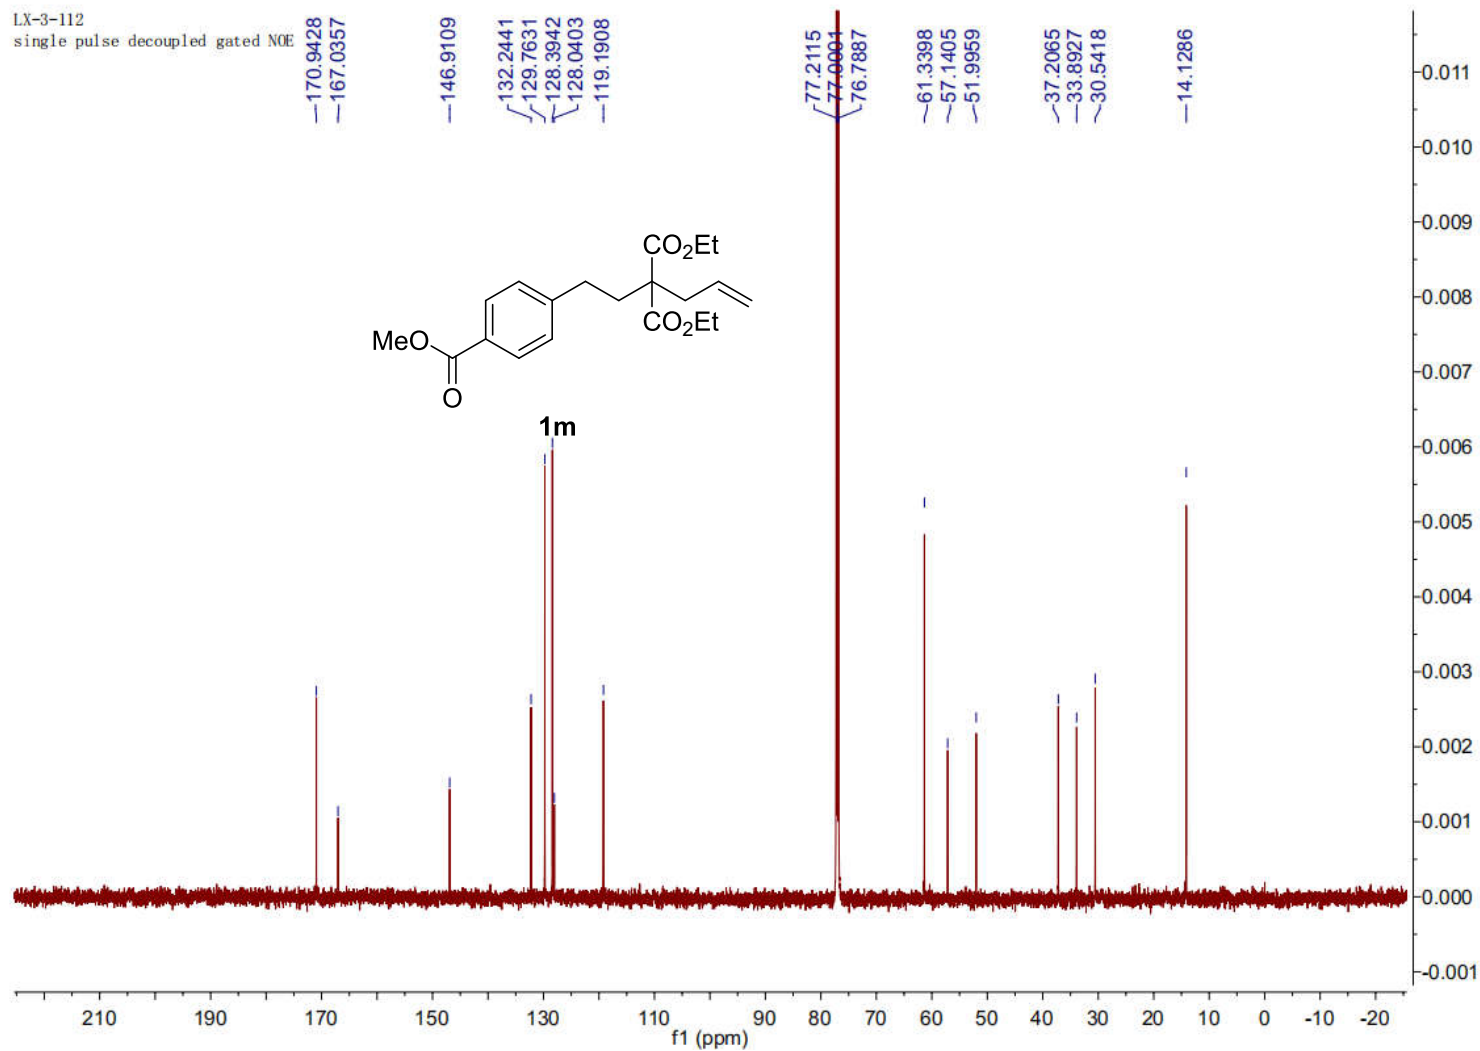

LHT-1-22  
single\_pulse

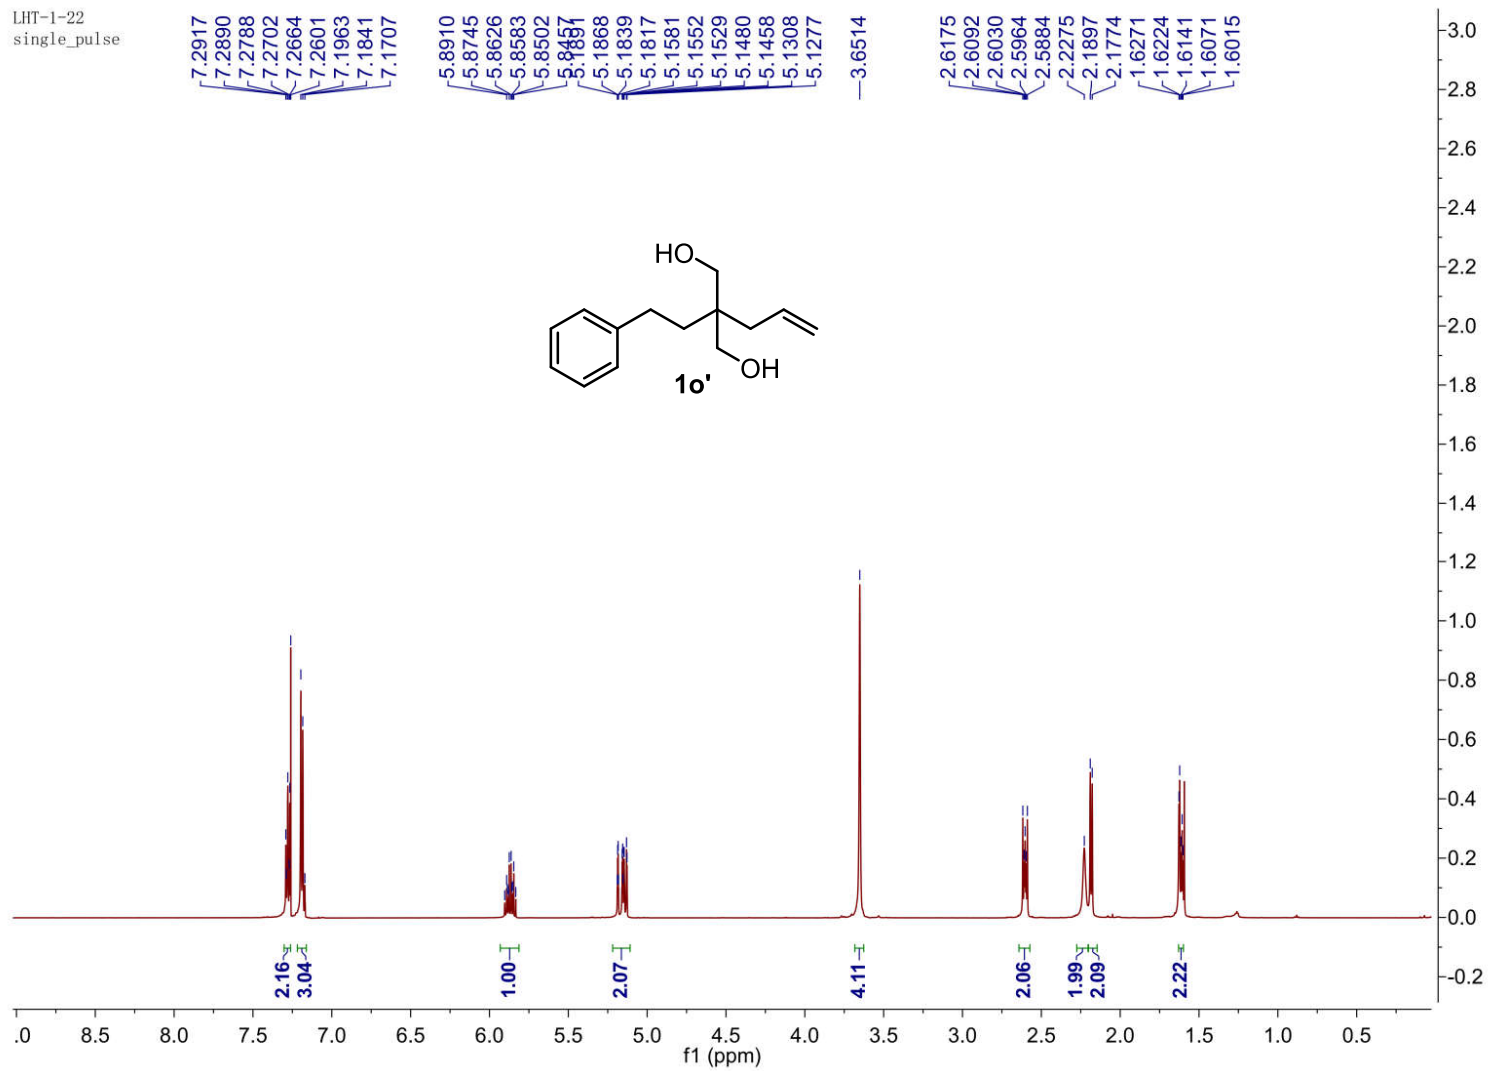

LHT-1-22  
single pulse decoupled gated NOE

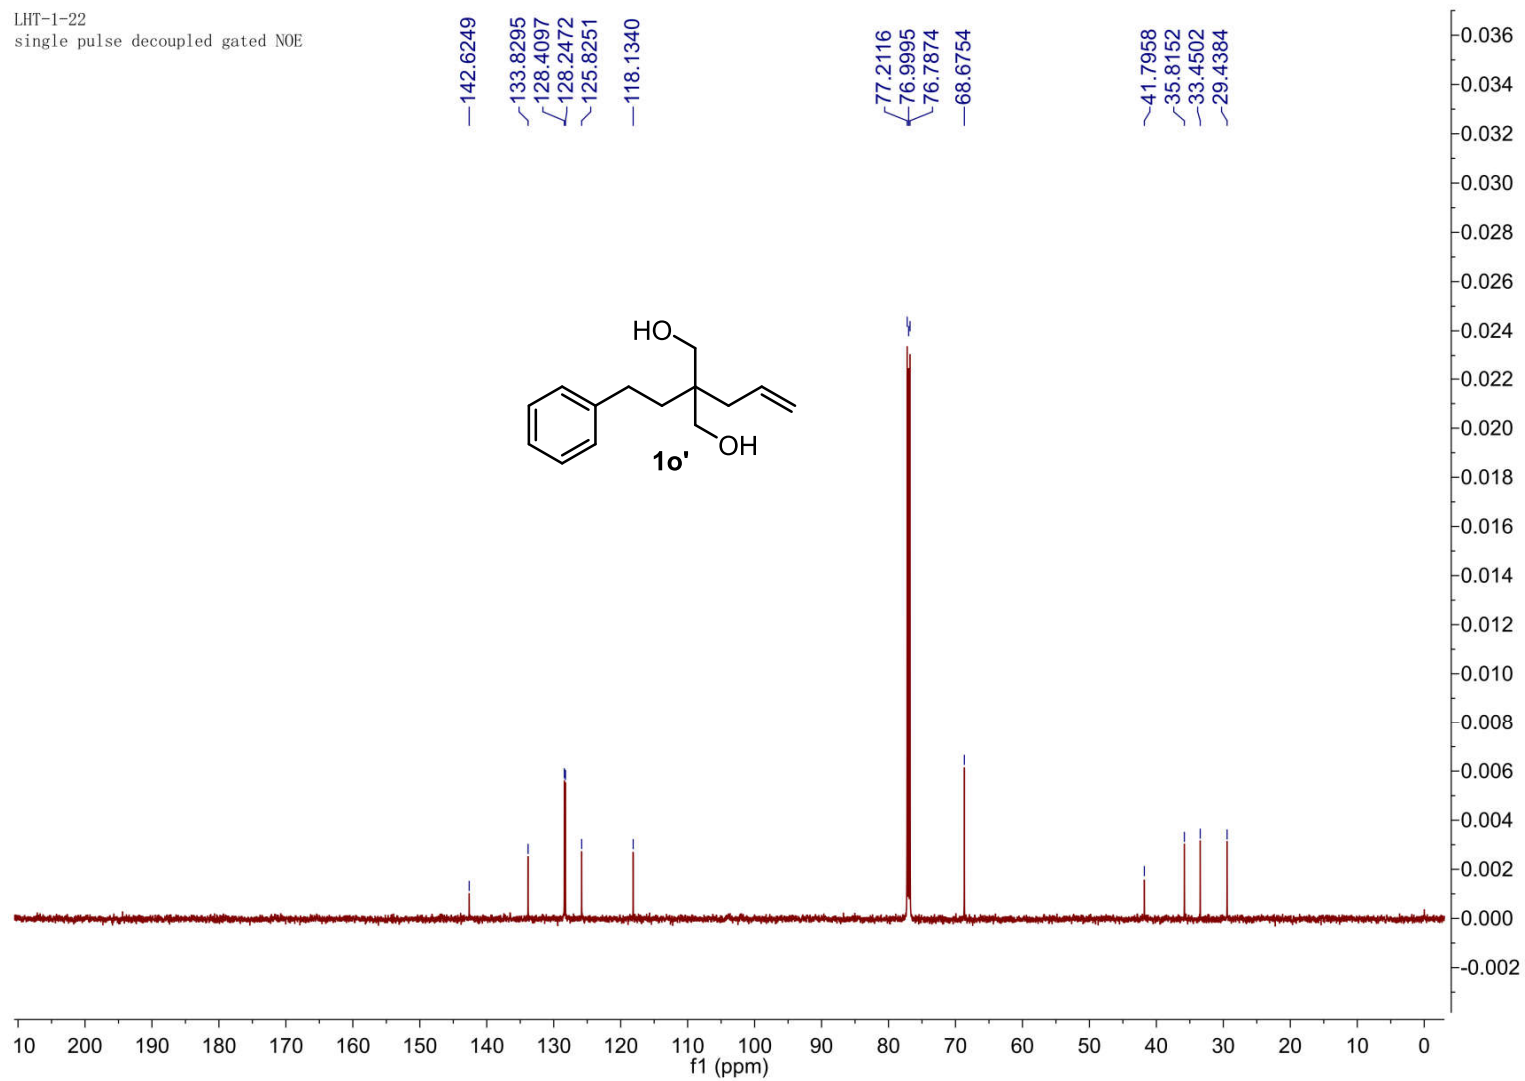

LX-3-94  
single\_pulse

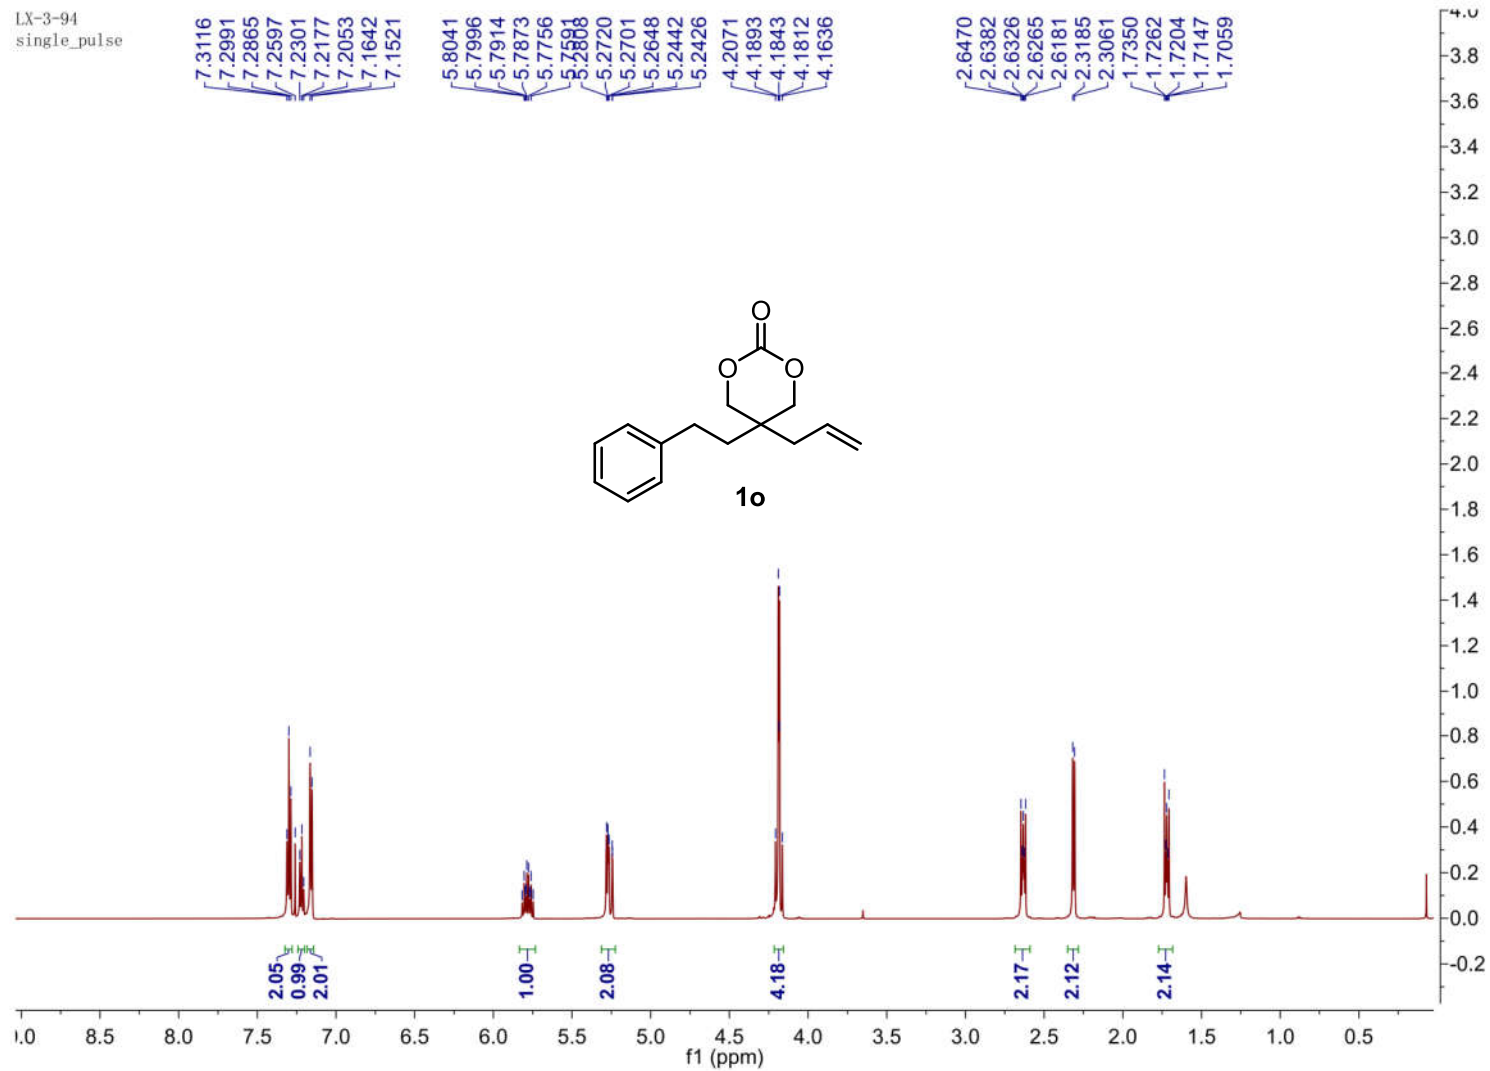

LX-3-94  
single pulse decoupled gated NOE

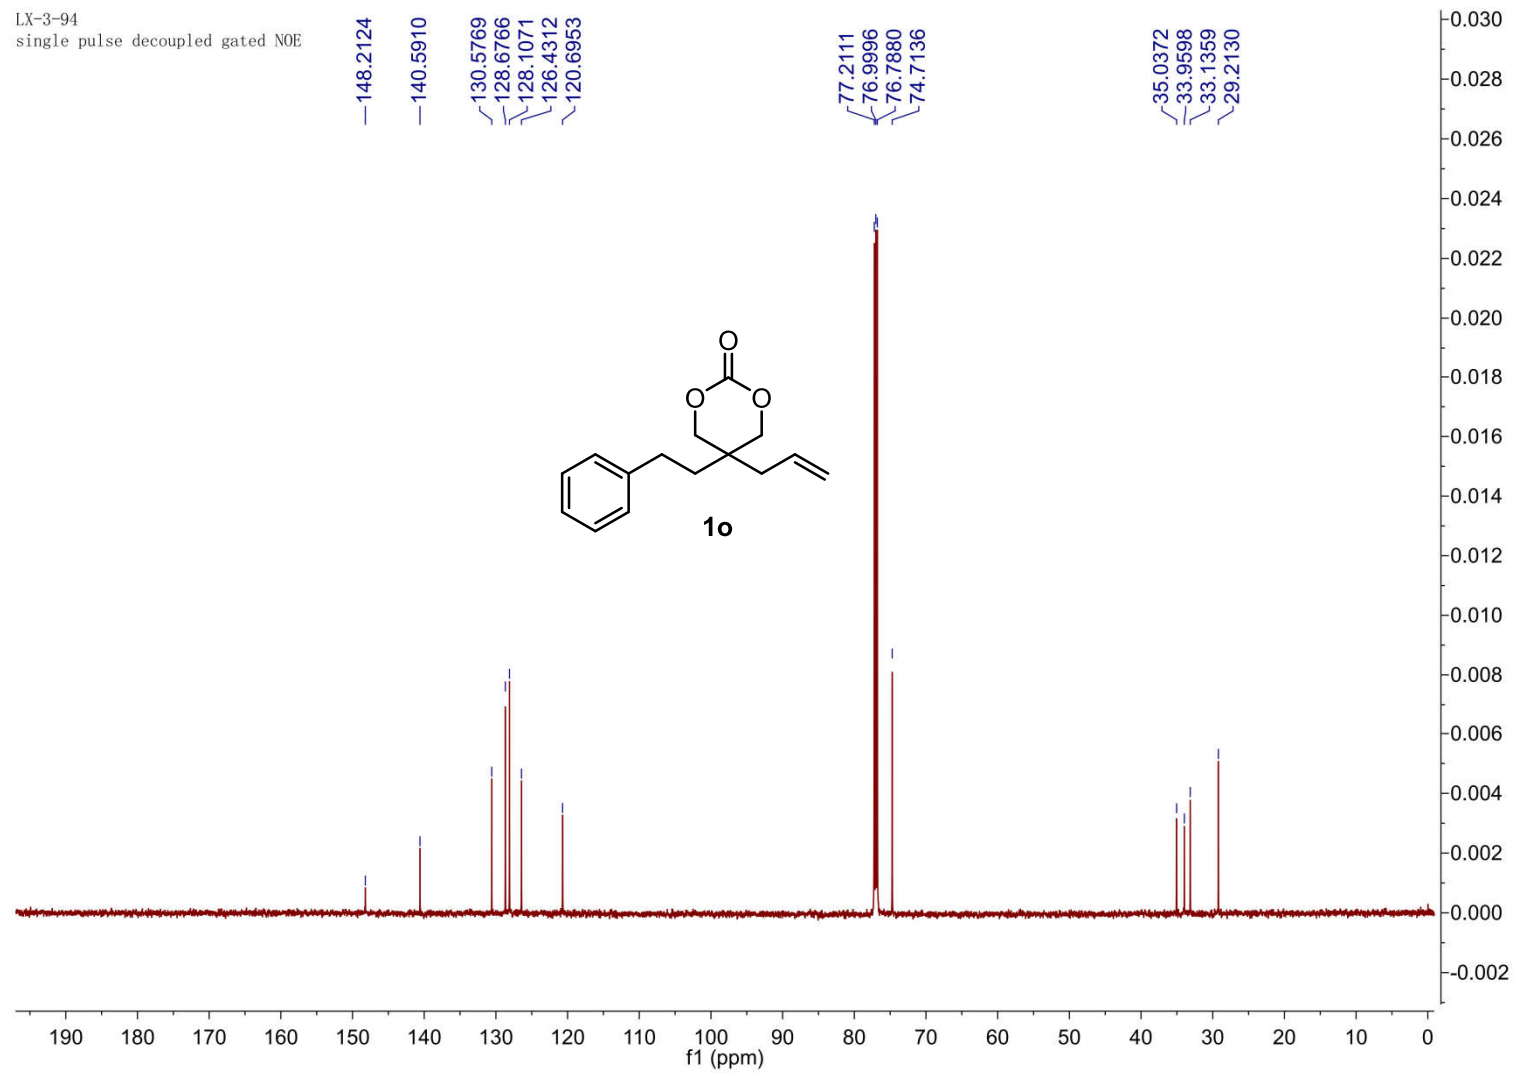

LX-3-105  
single\_pulse

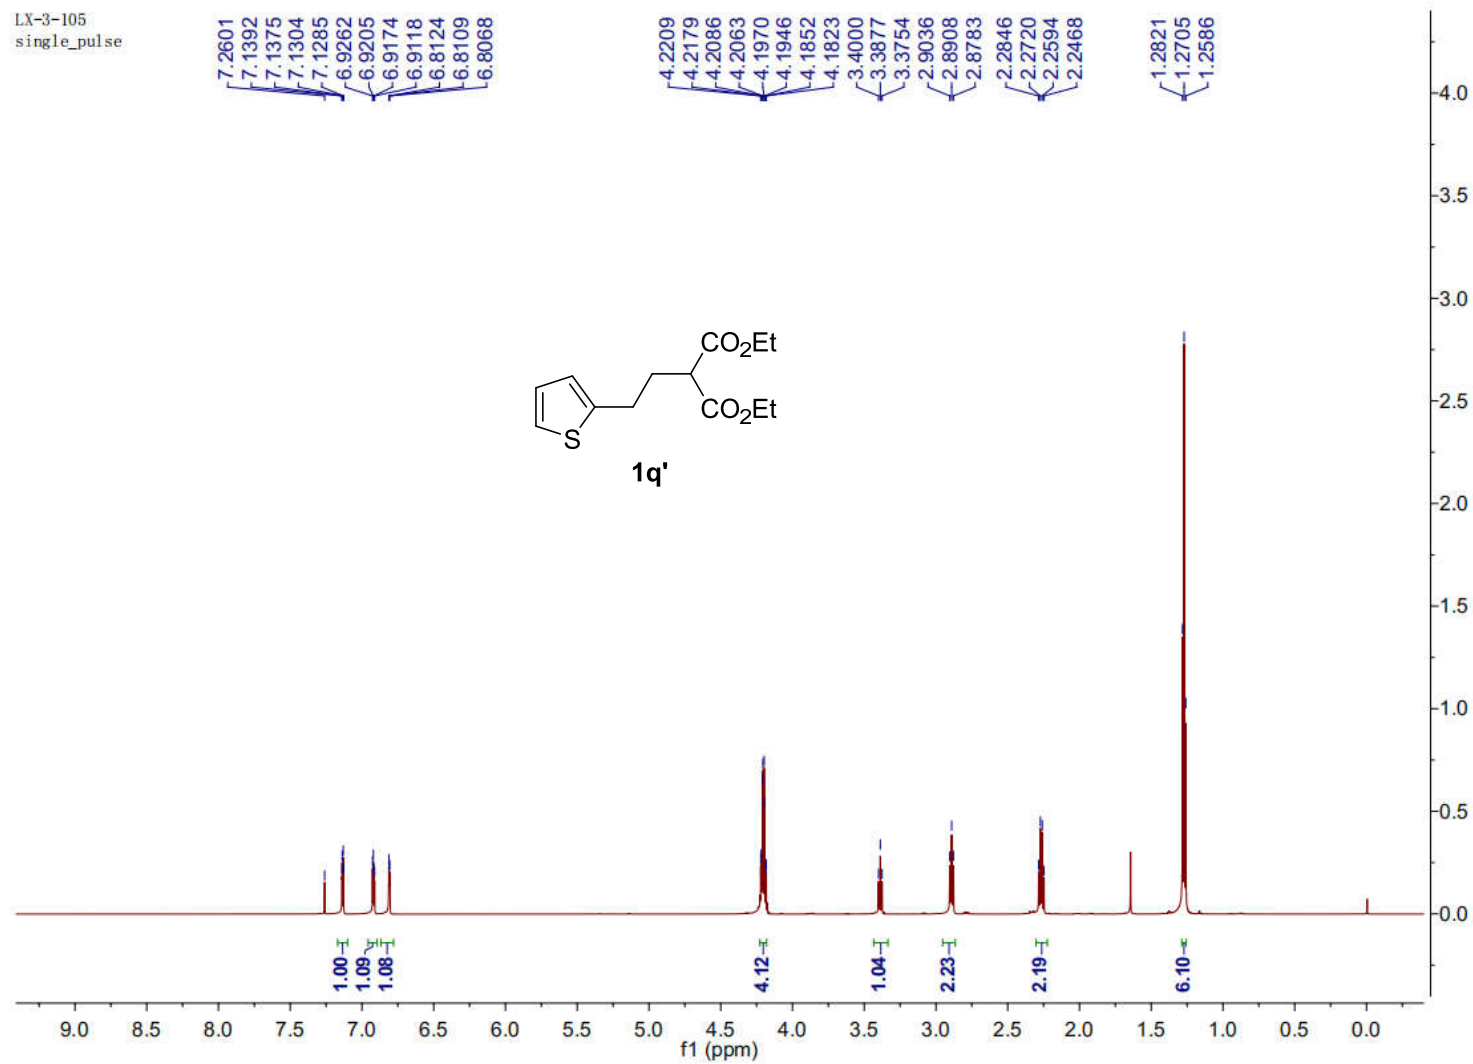

LX-3-105  
single pulse decoupled gated NOE

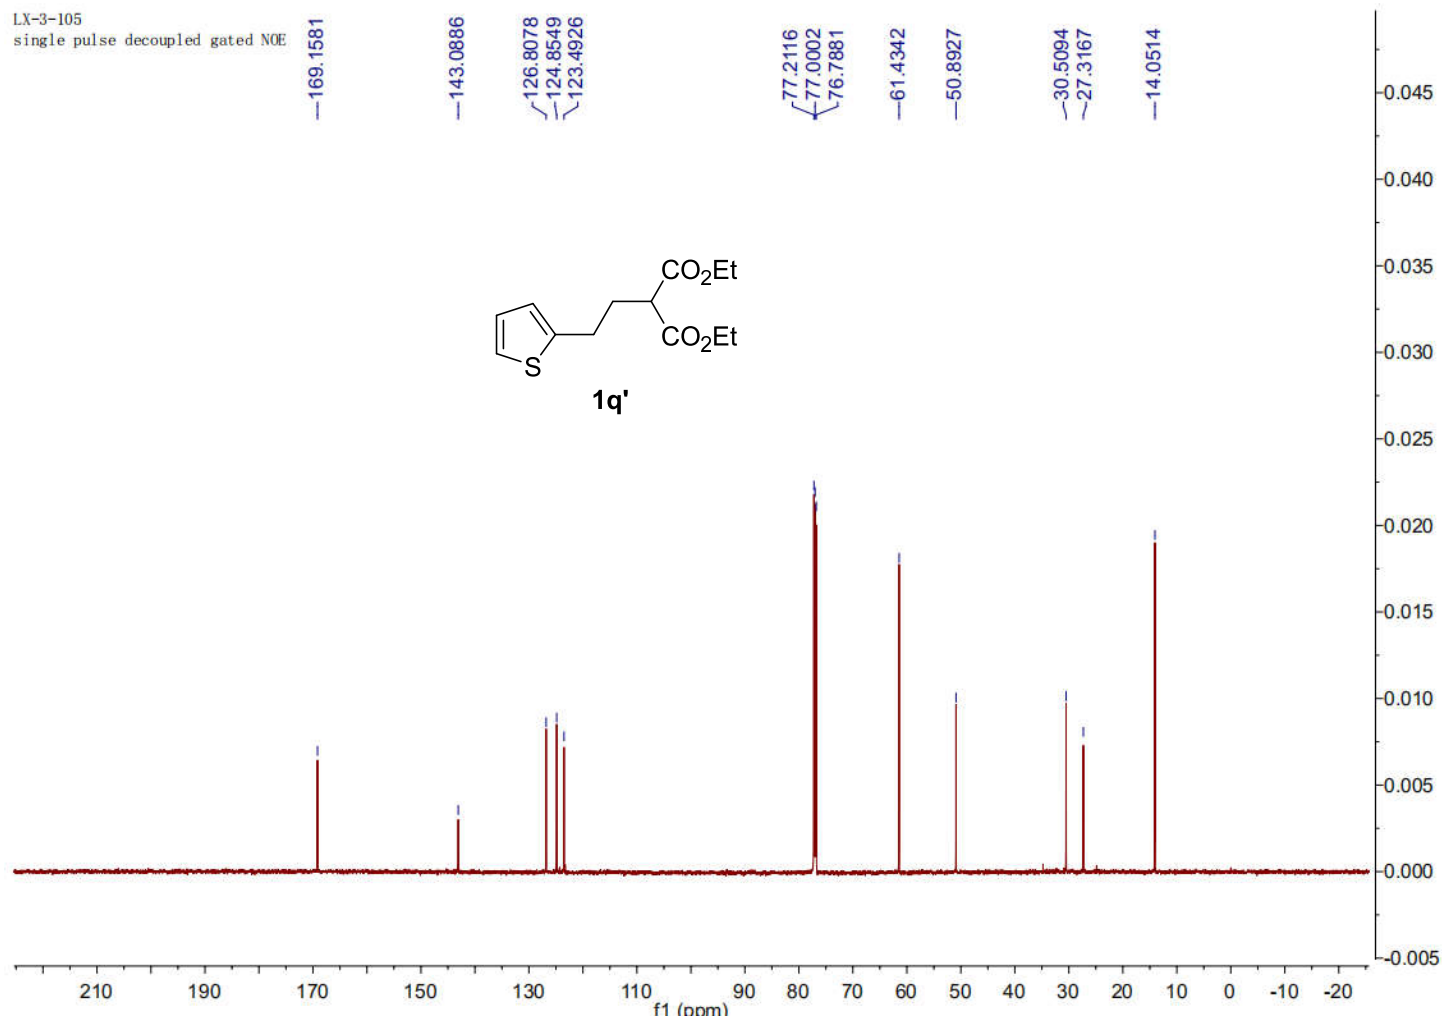

LX-3-106-2  
single\_pulse

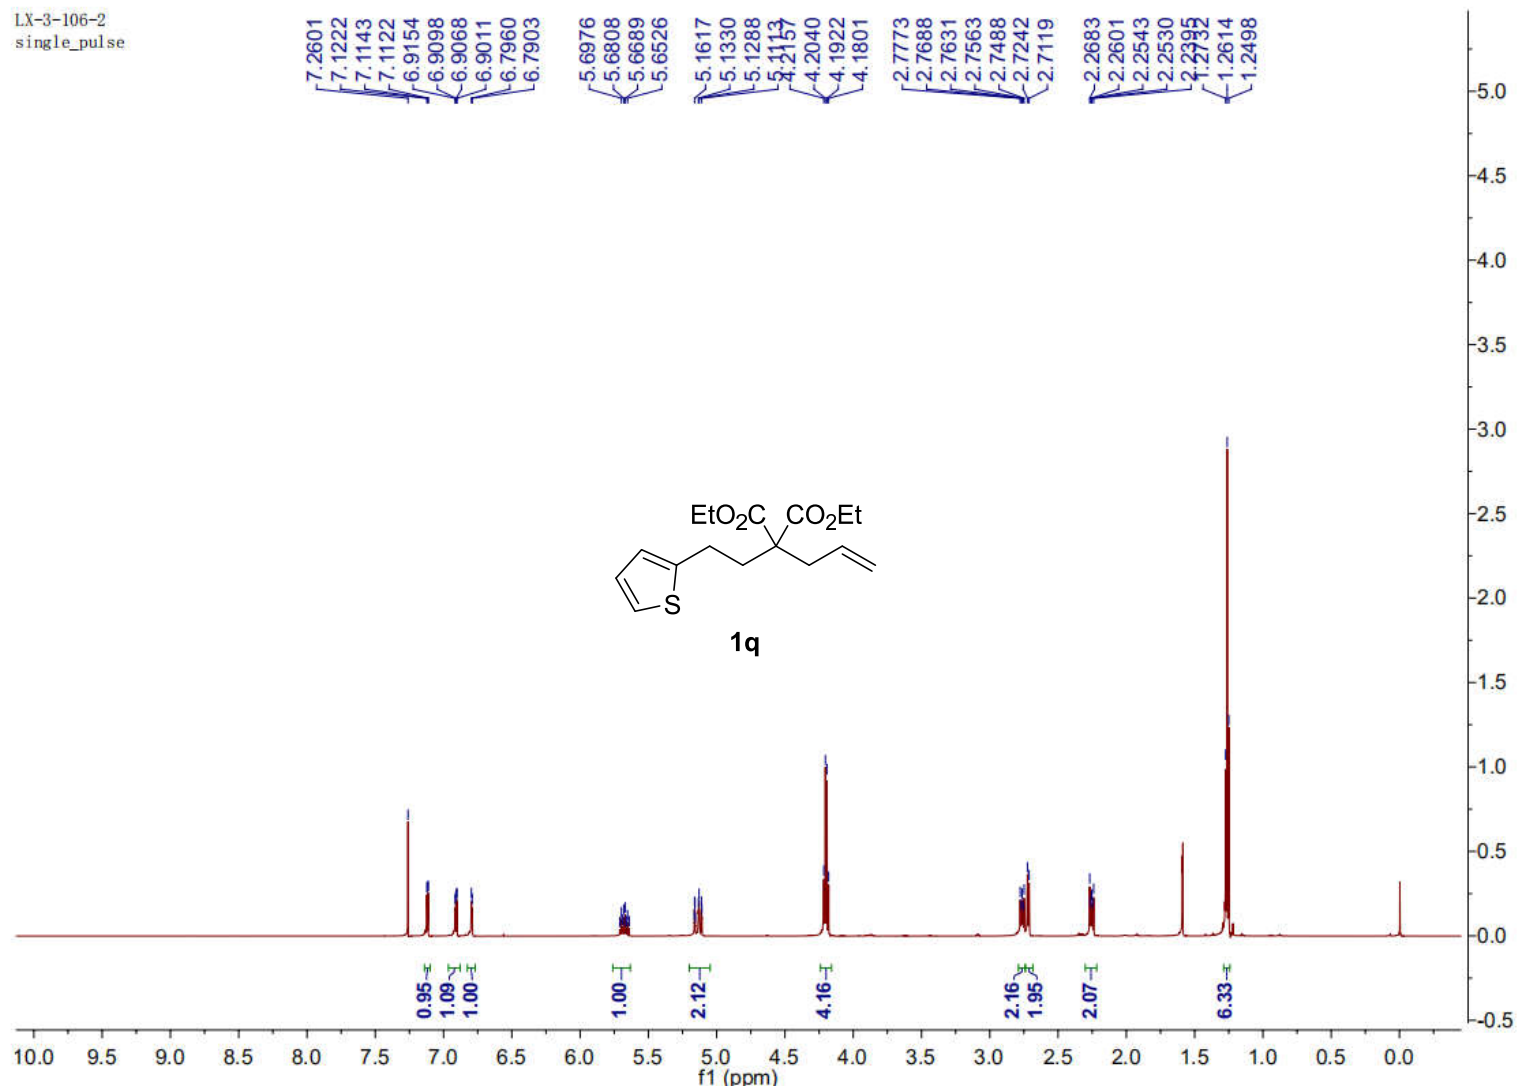



LX-3-106  
single pulse decoupled gated NCE

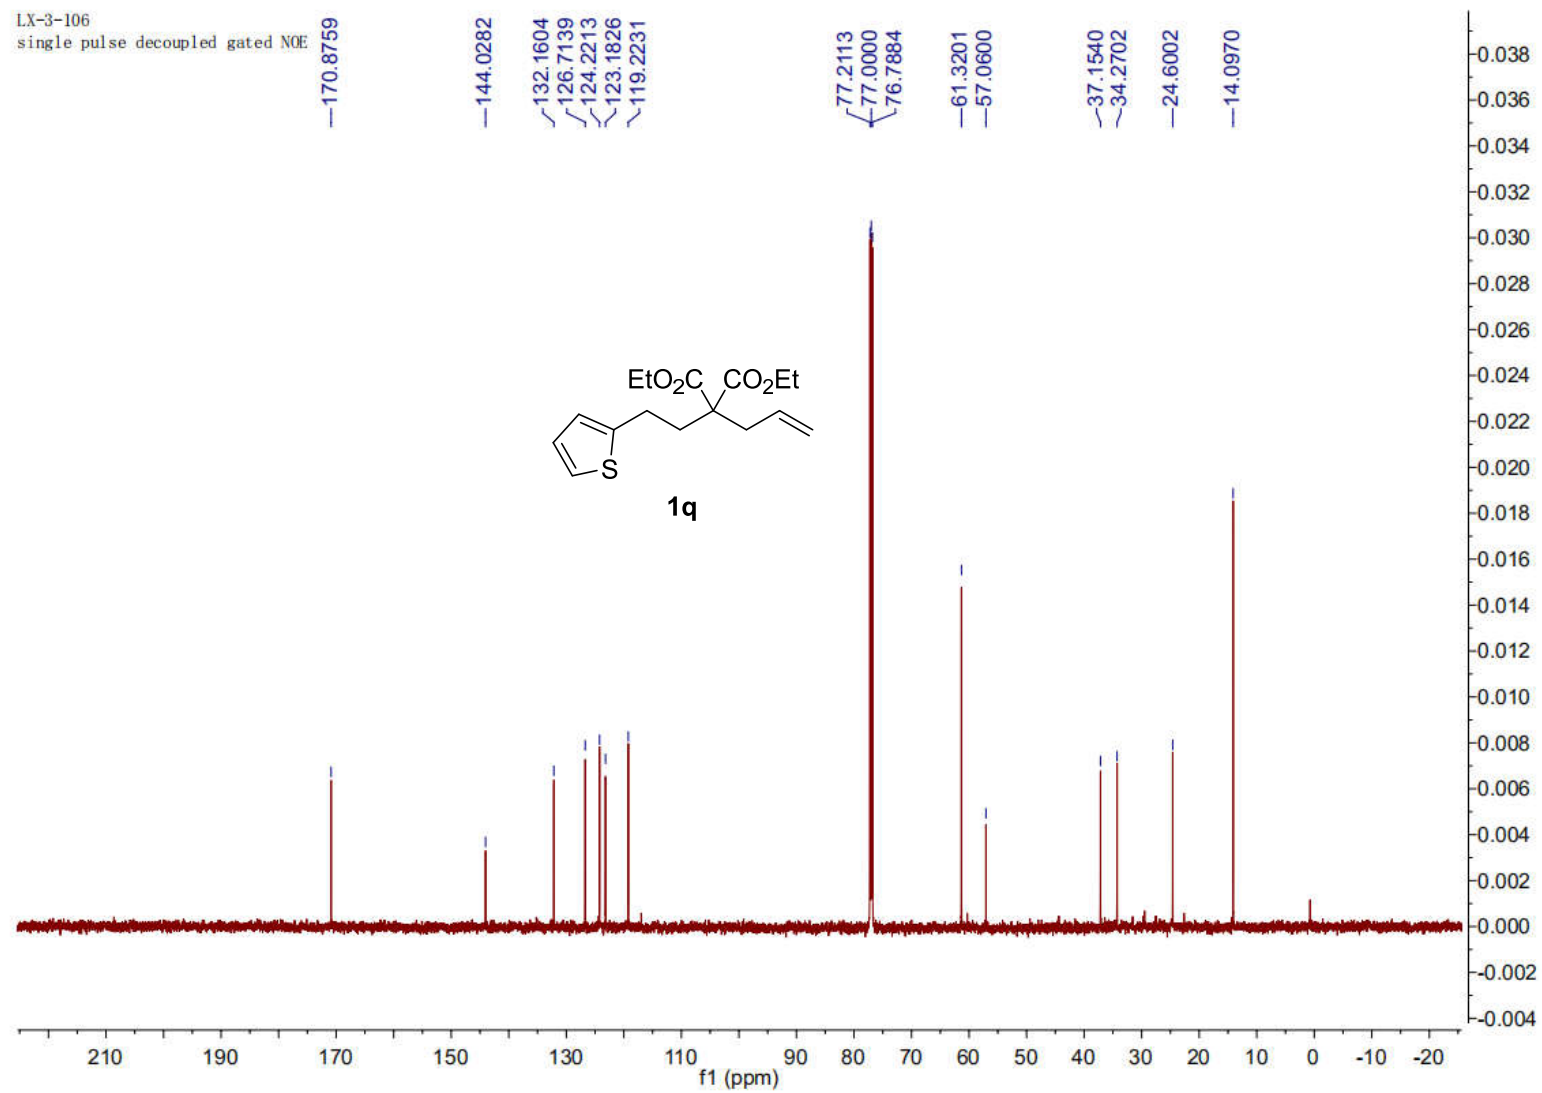

LX-3-68  
single\_pulse

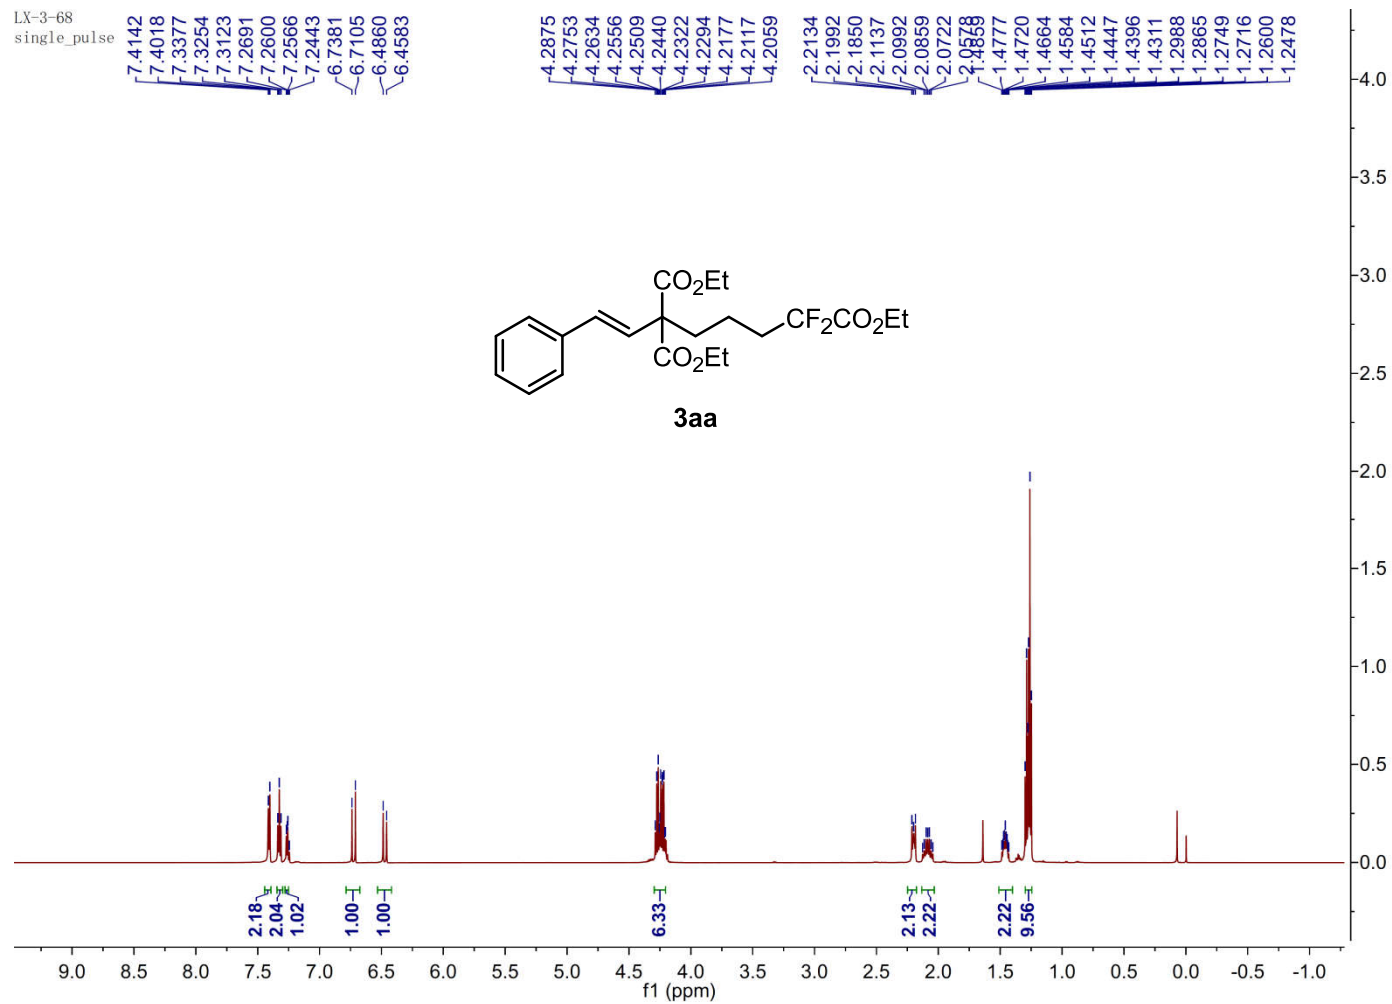

LX-3-68  
single\_pulse

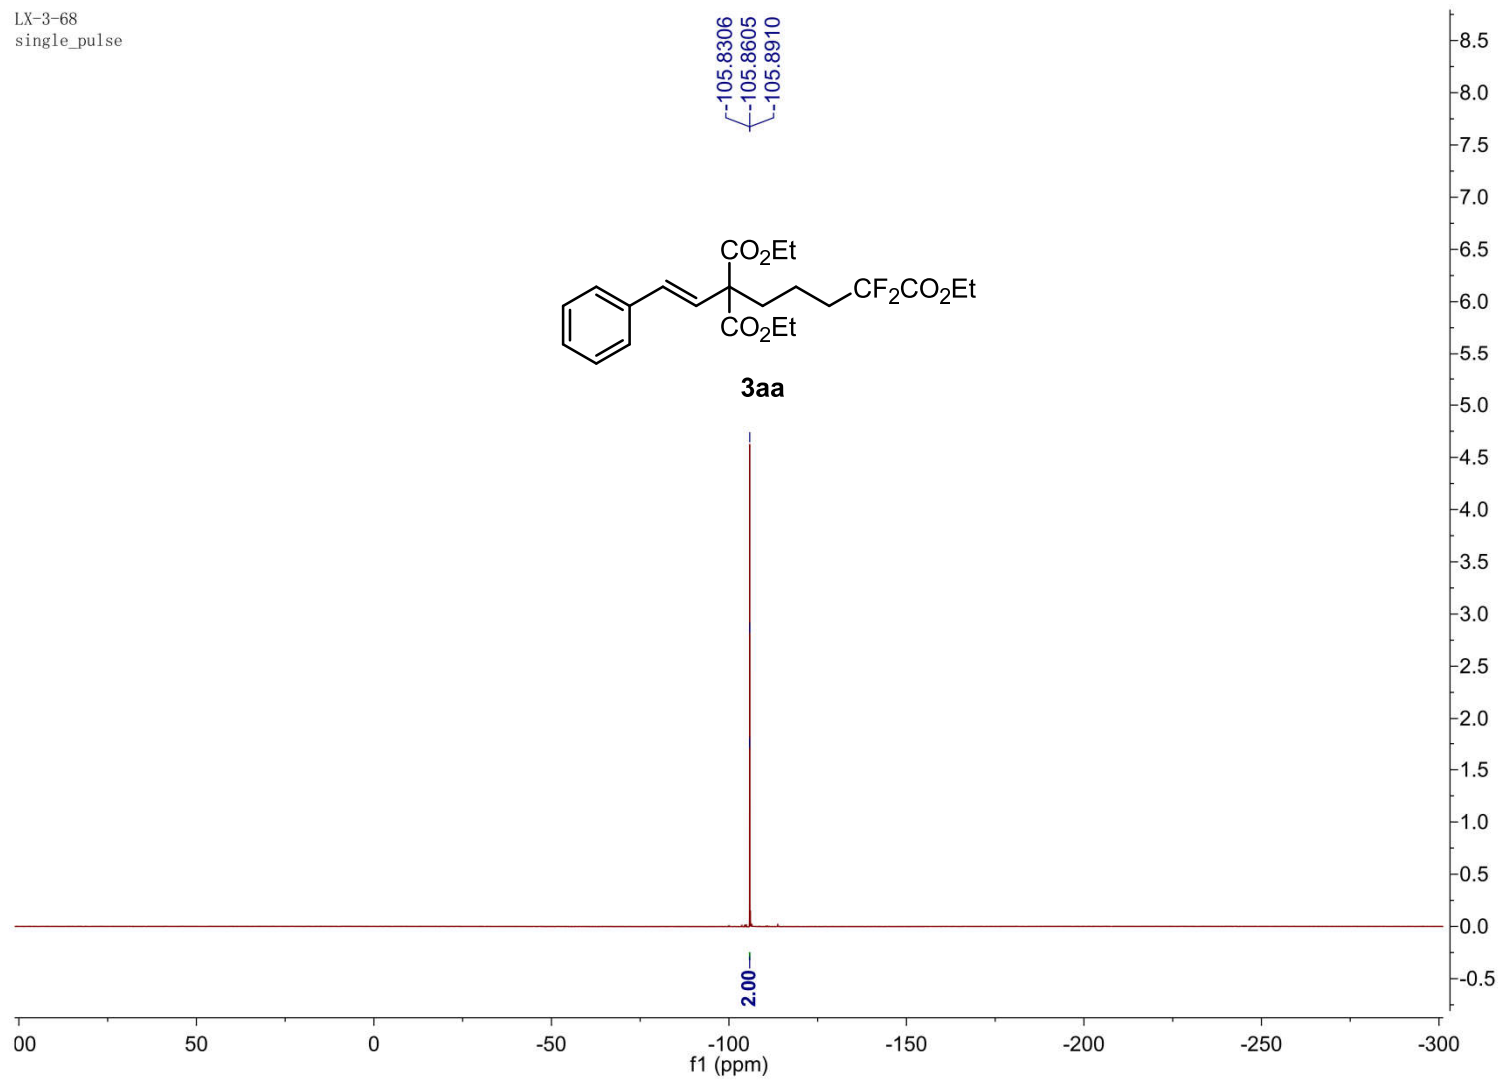

LX-3-68

single pulse decoupled gated NOE

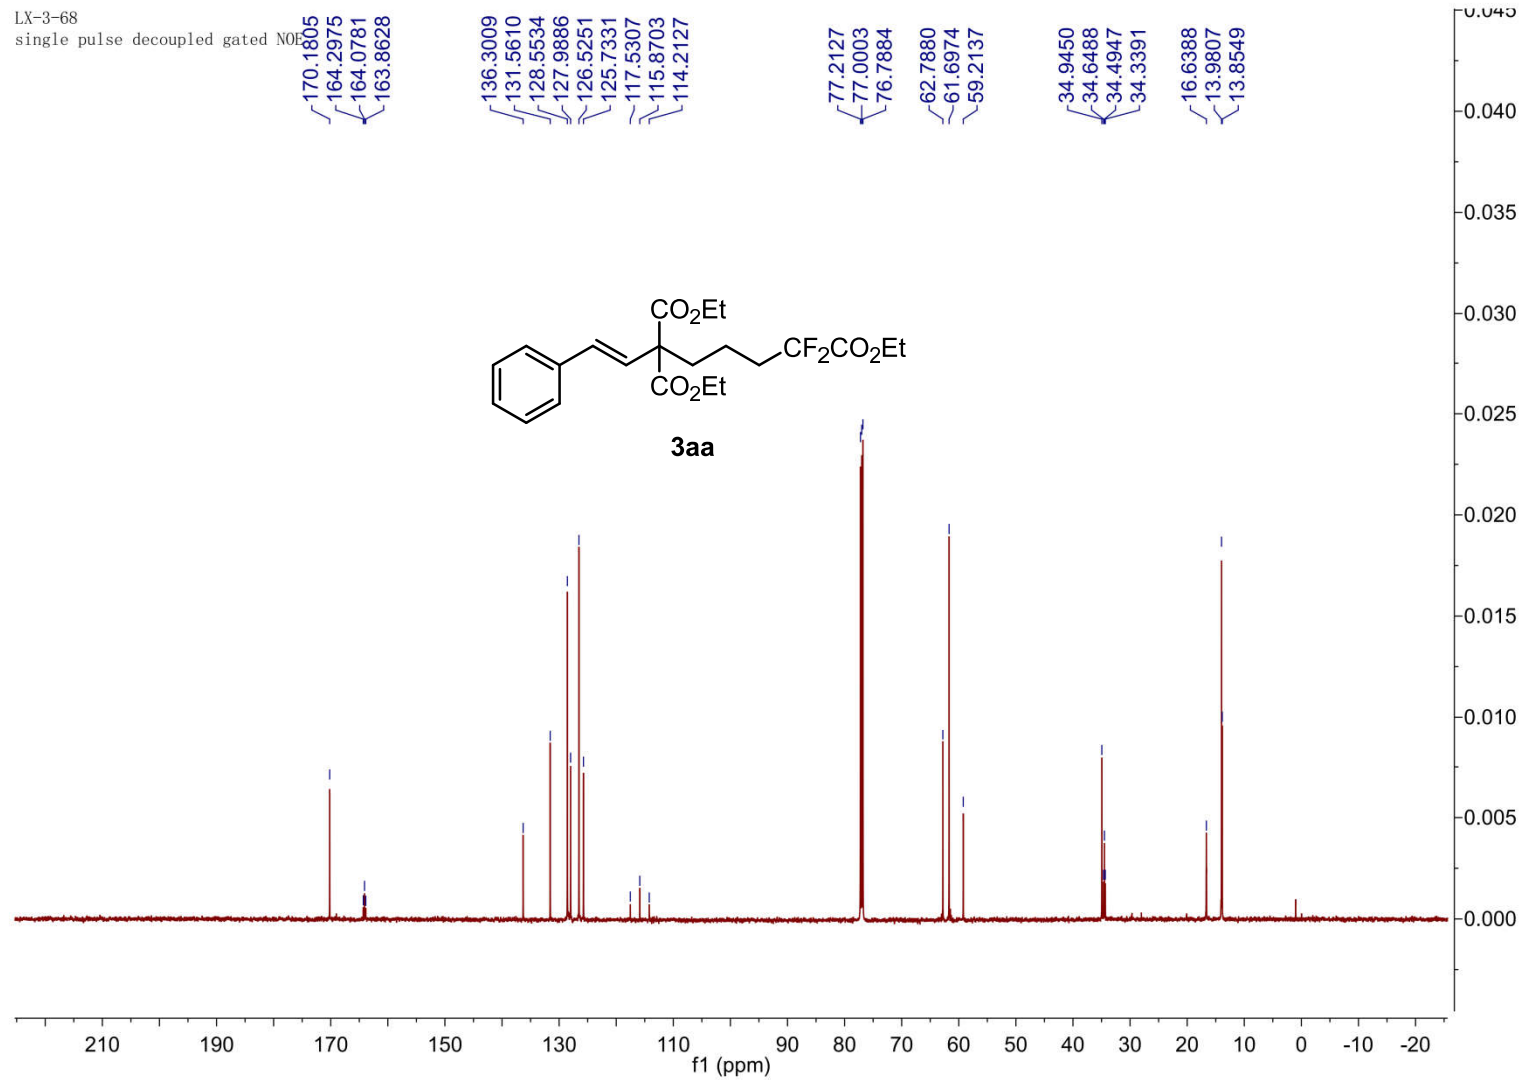

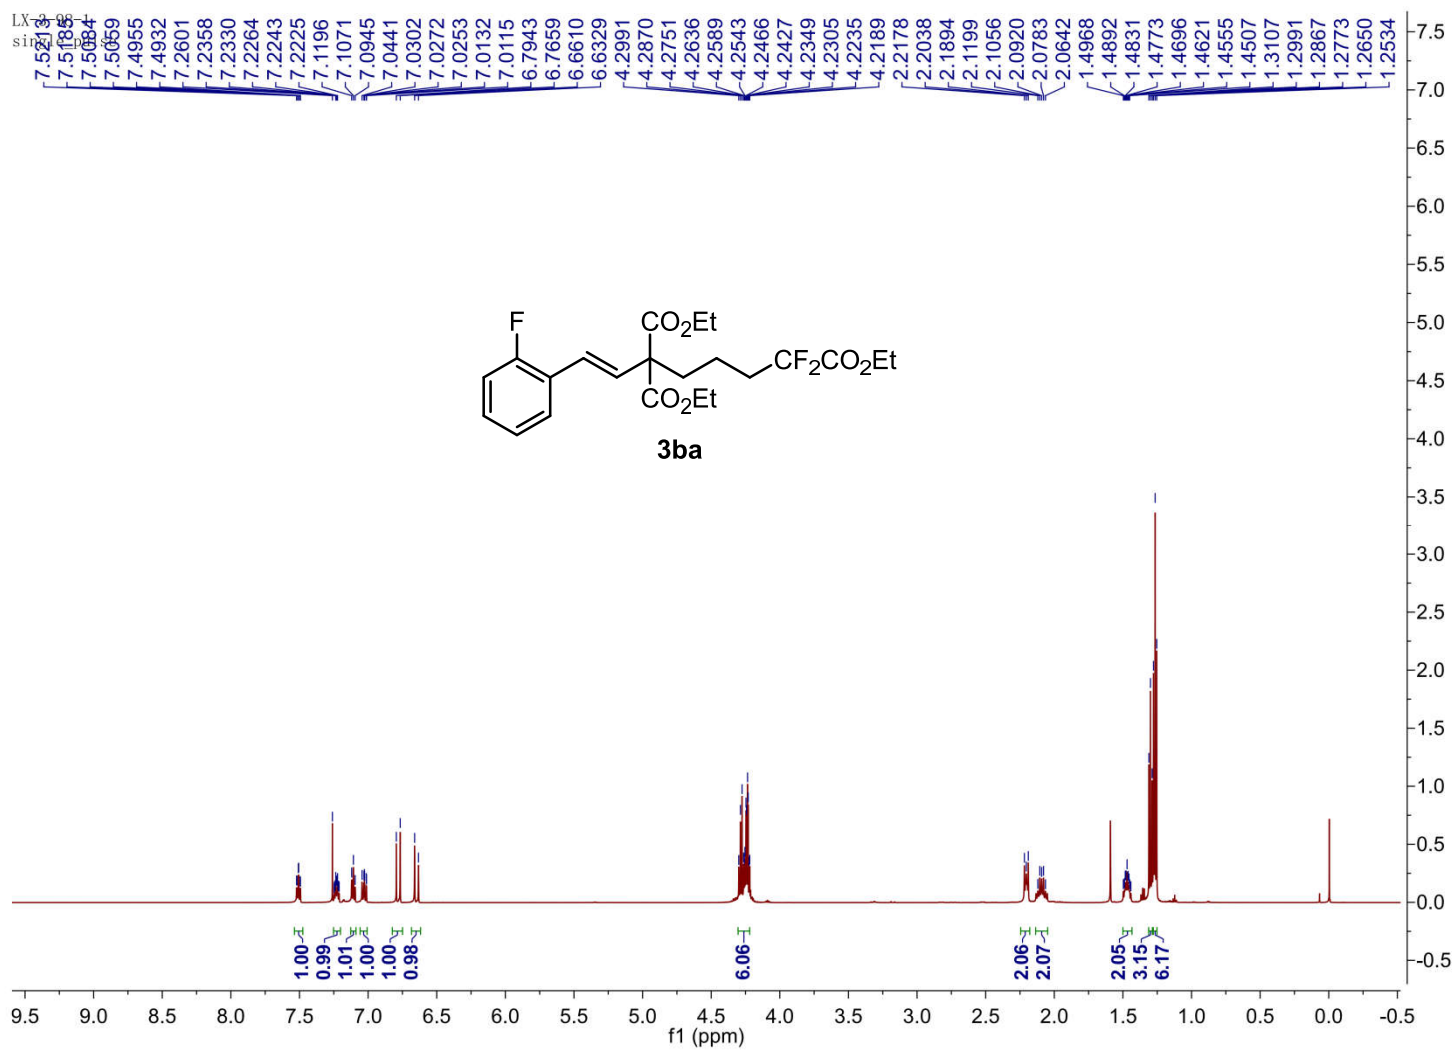

LX-3-98-1  
single\_pulse

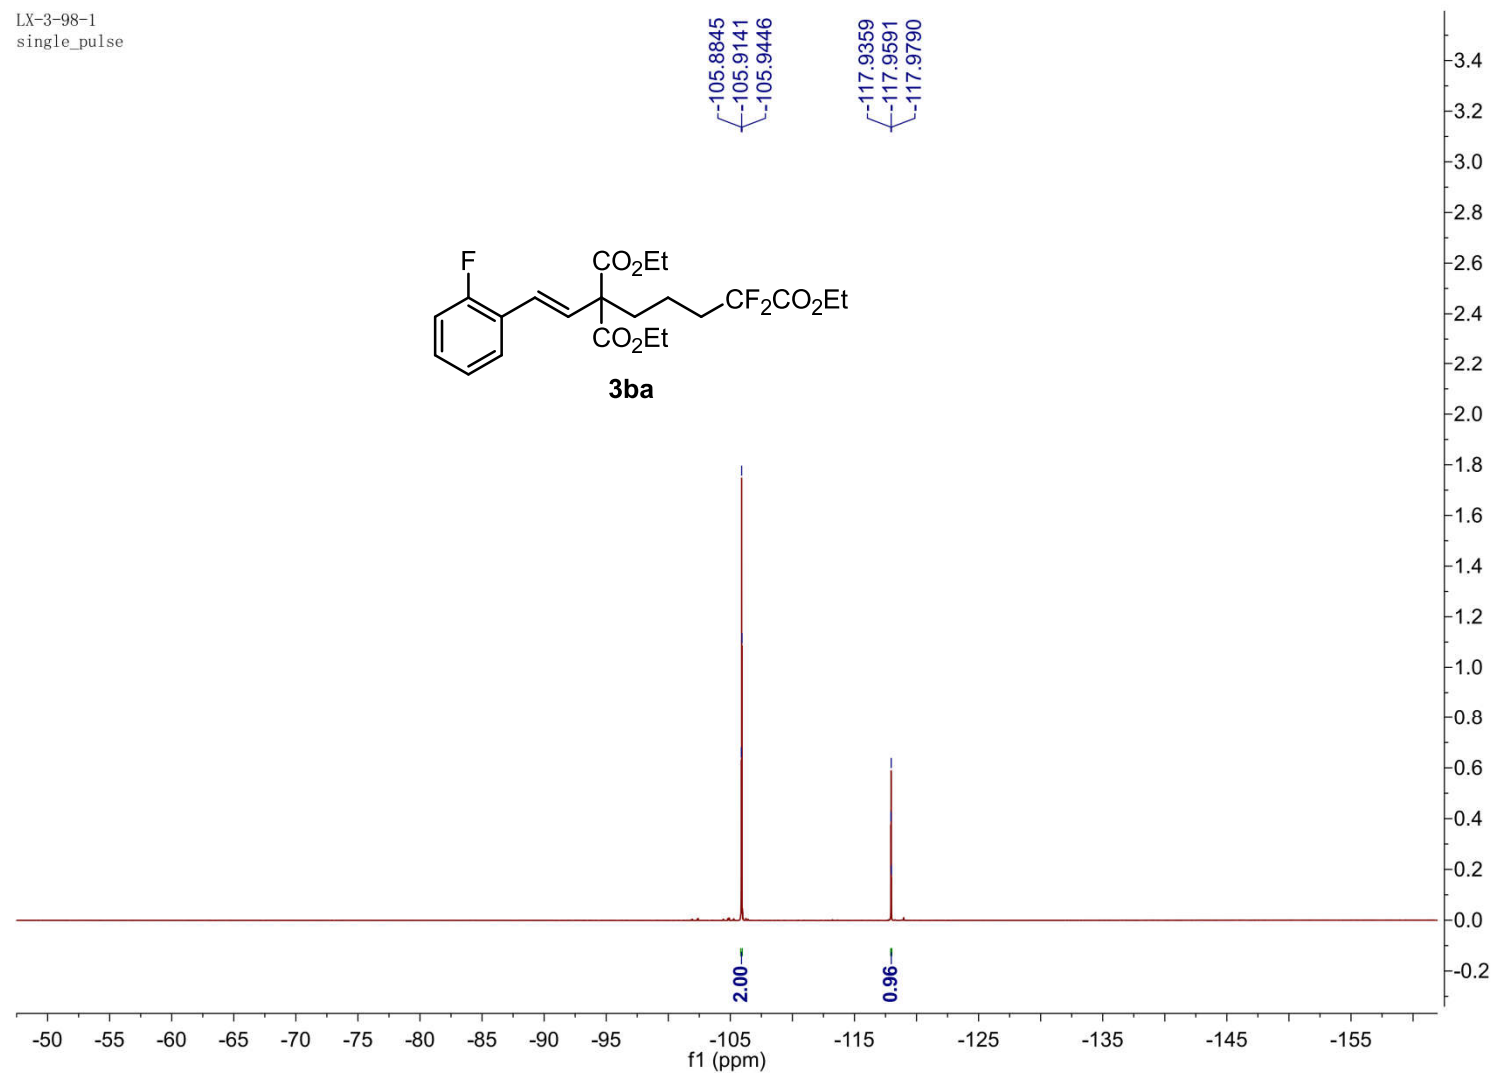

LX-3-98-1  
single pulse decoupled gated

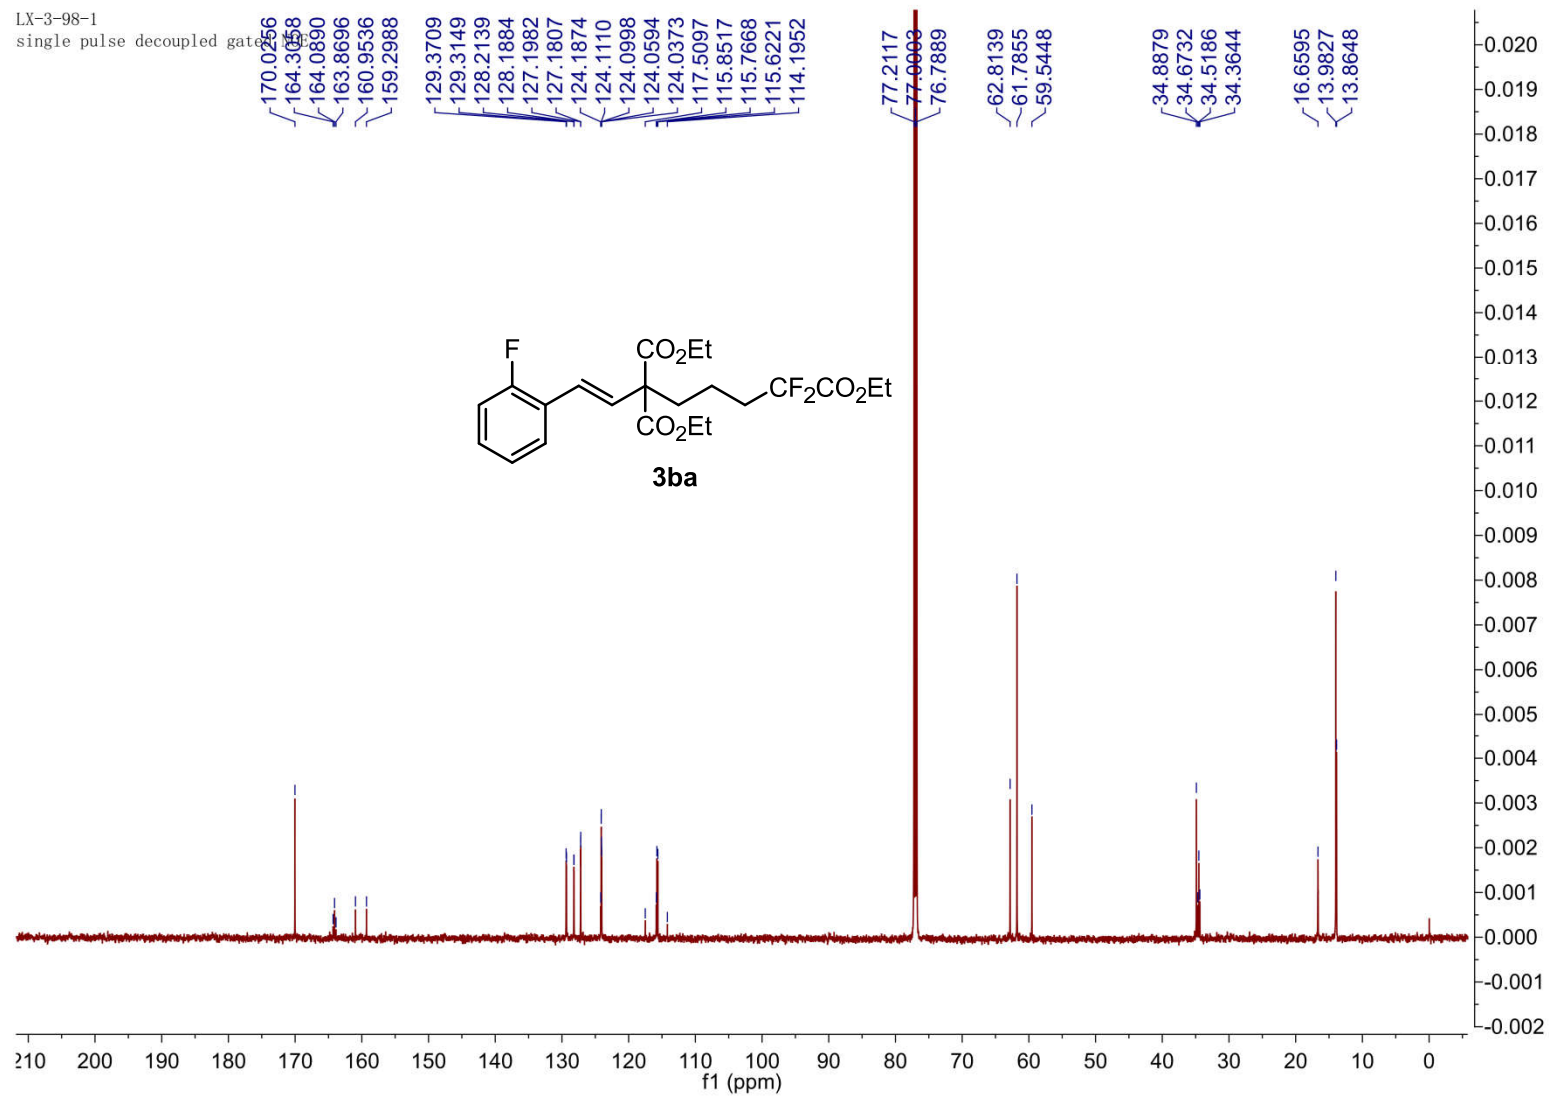

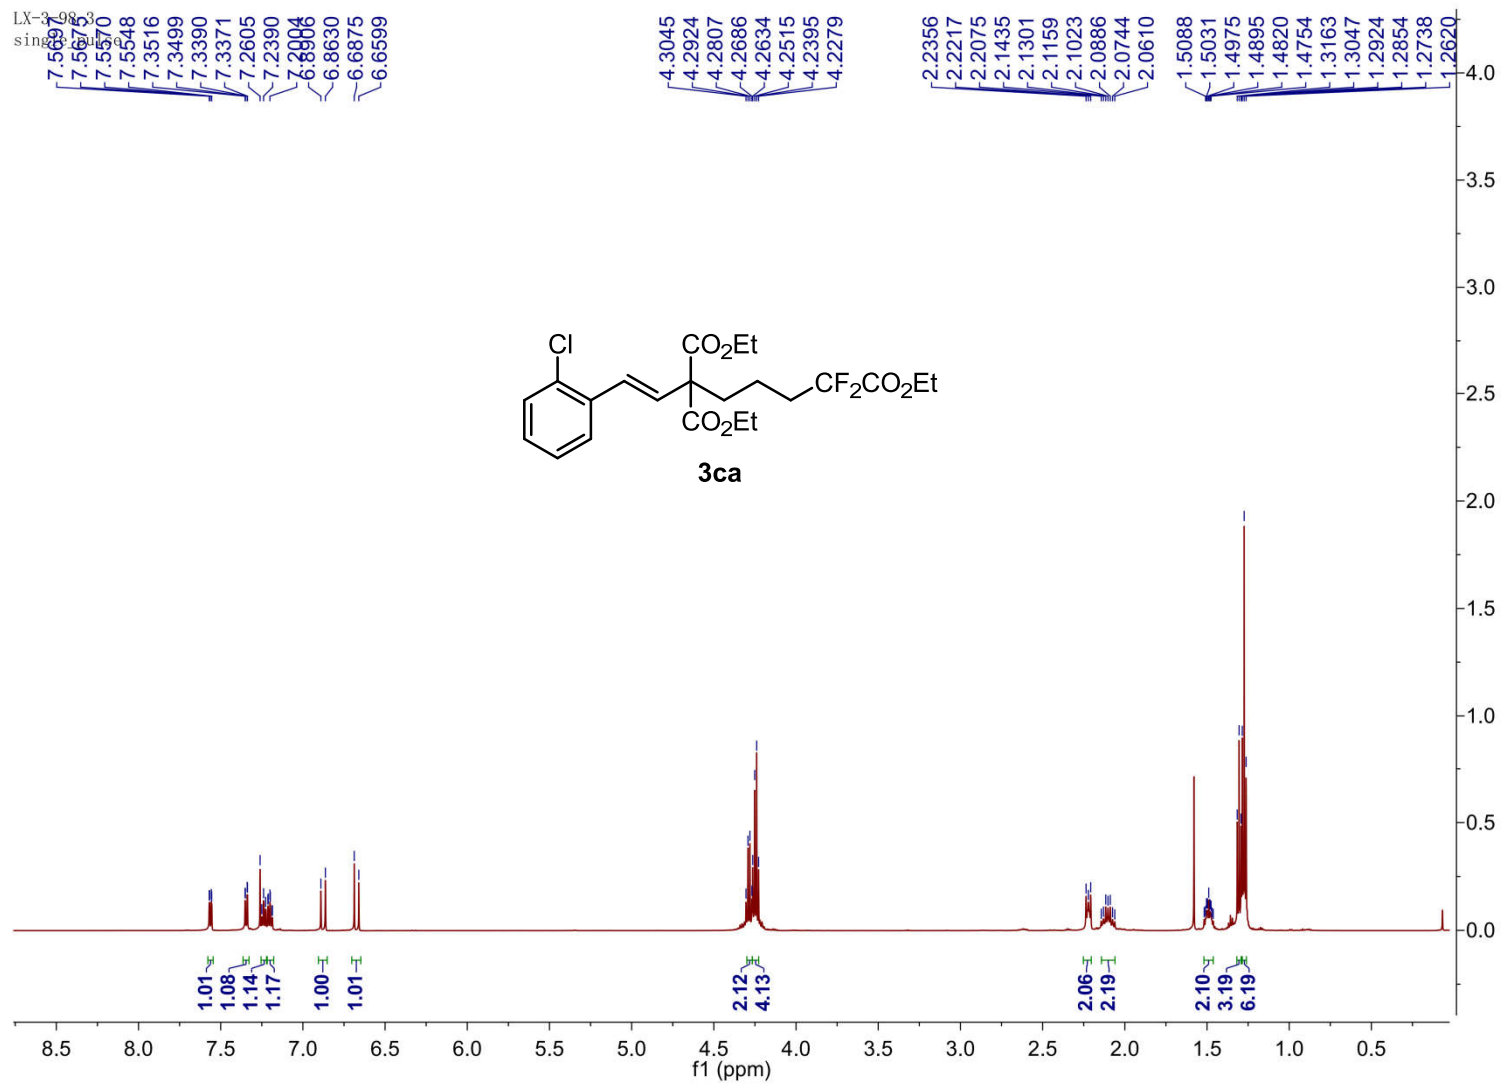



LX-3-98-3  
single\_pulse

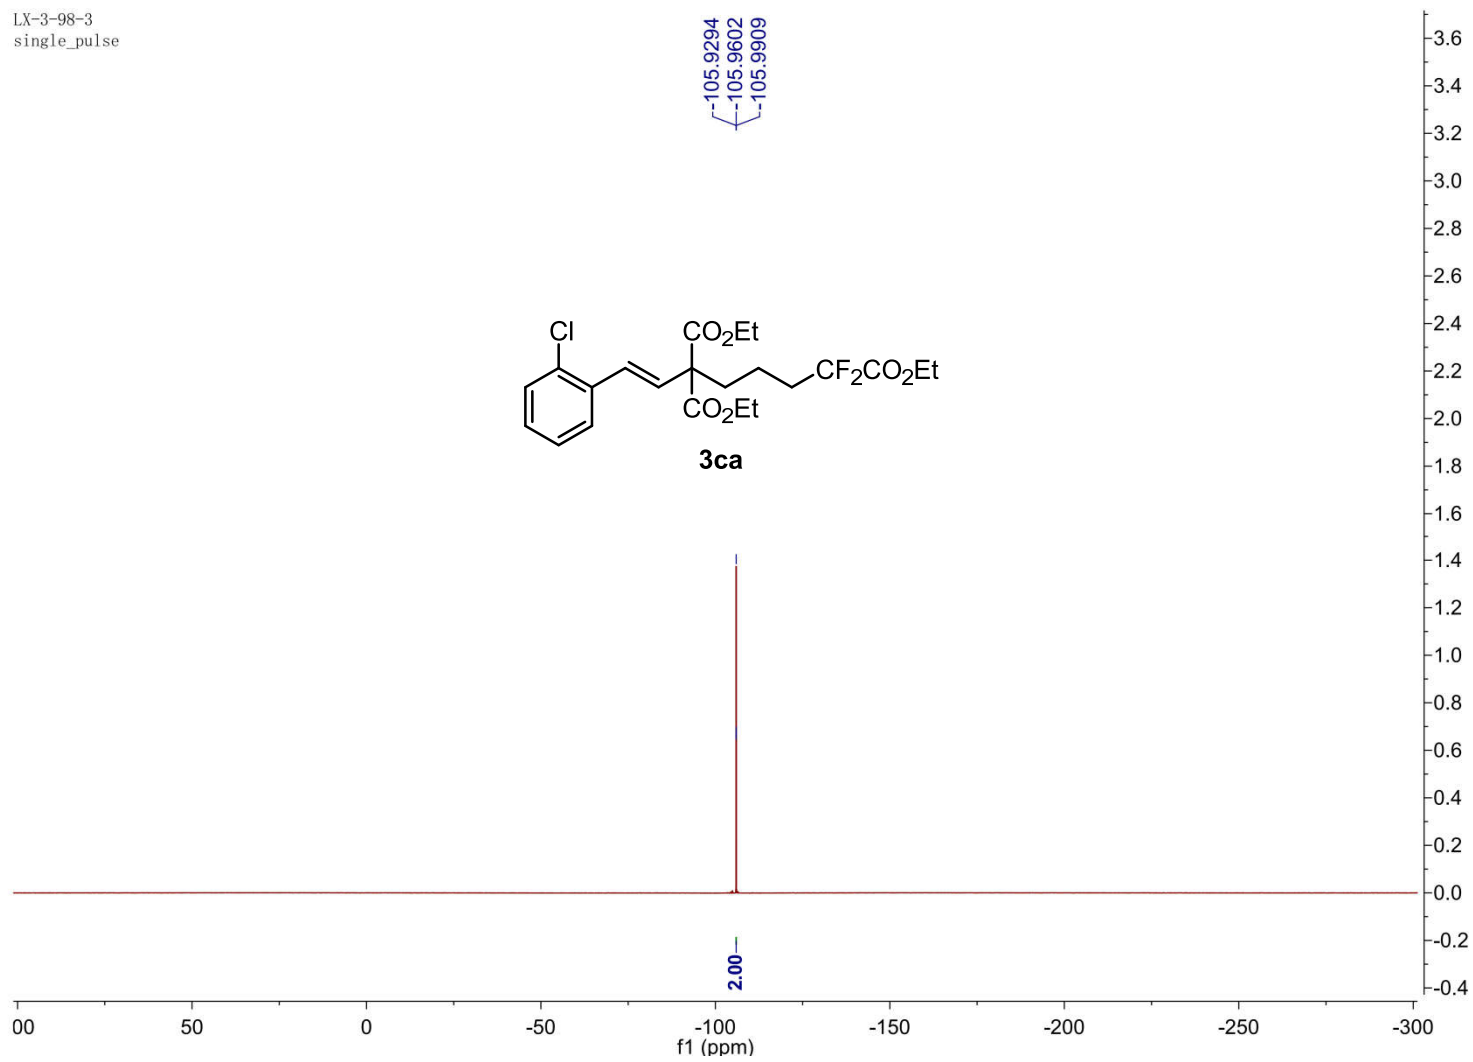

LX-3-98-3  
single pulse decoupled gated NOE

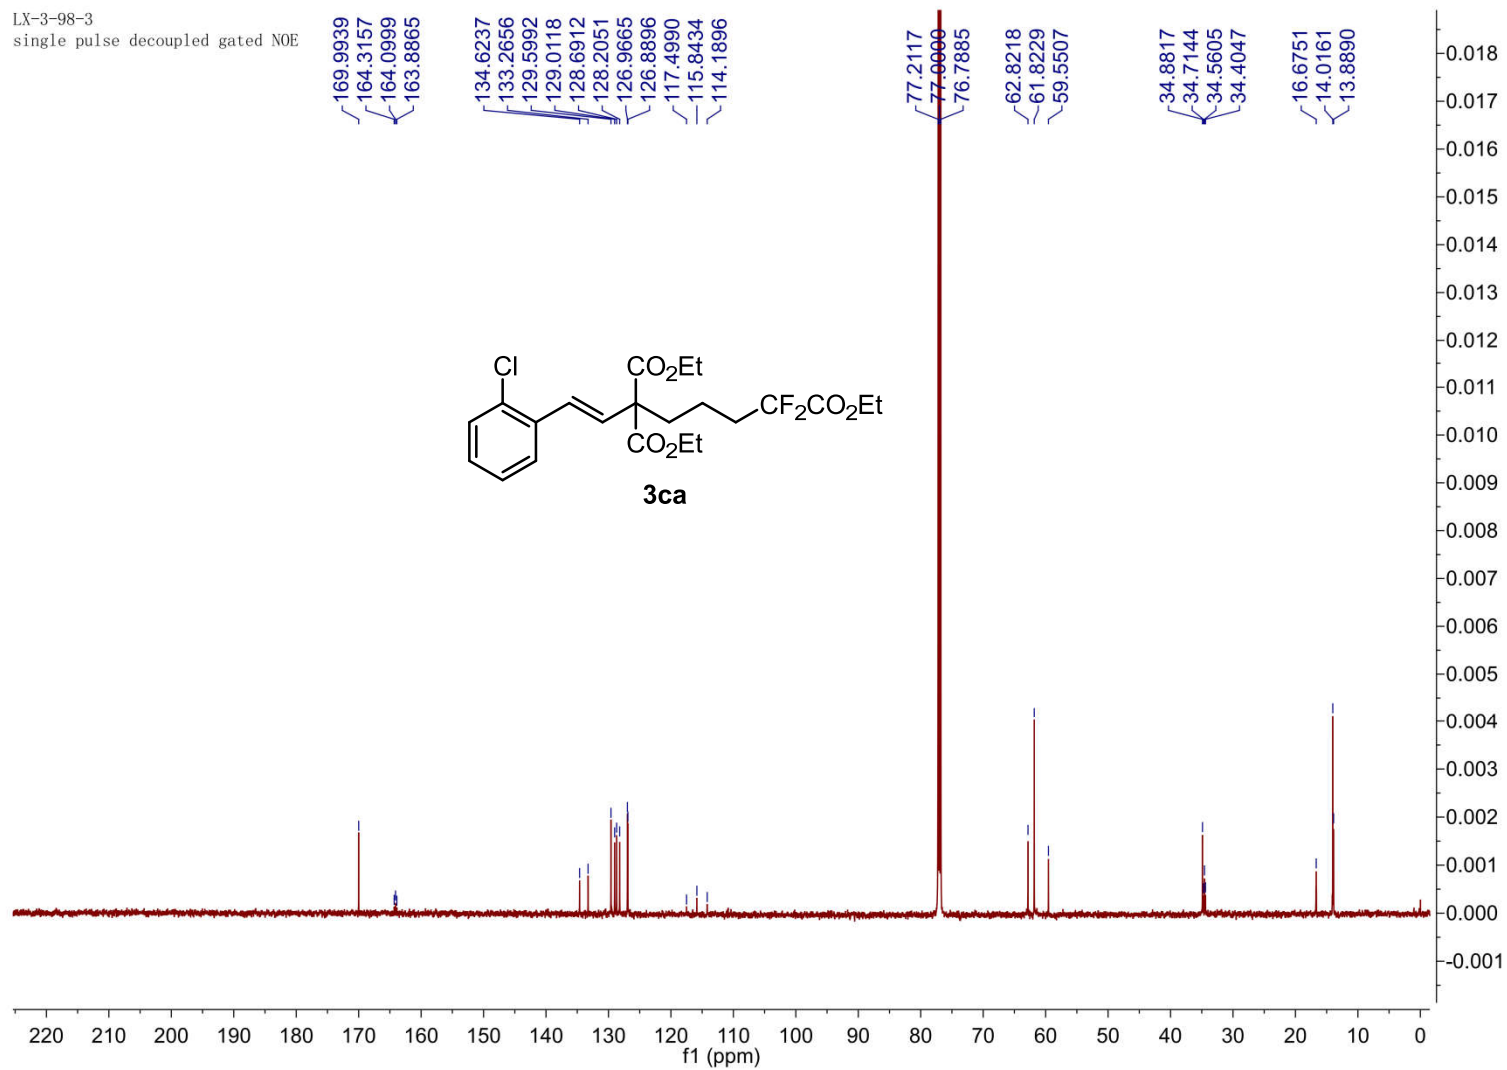

LX-3-98-2  
single\_pulse

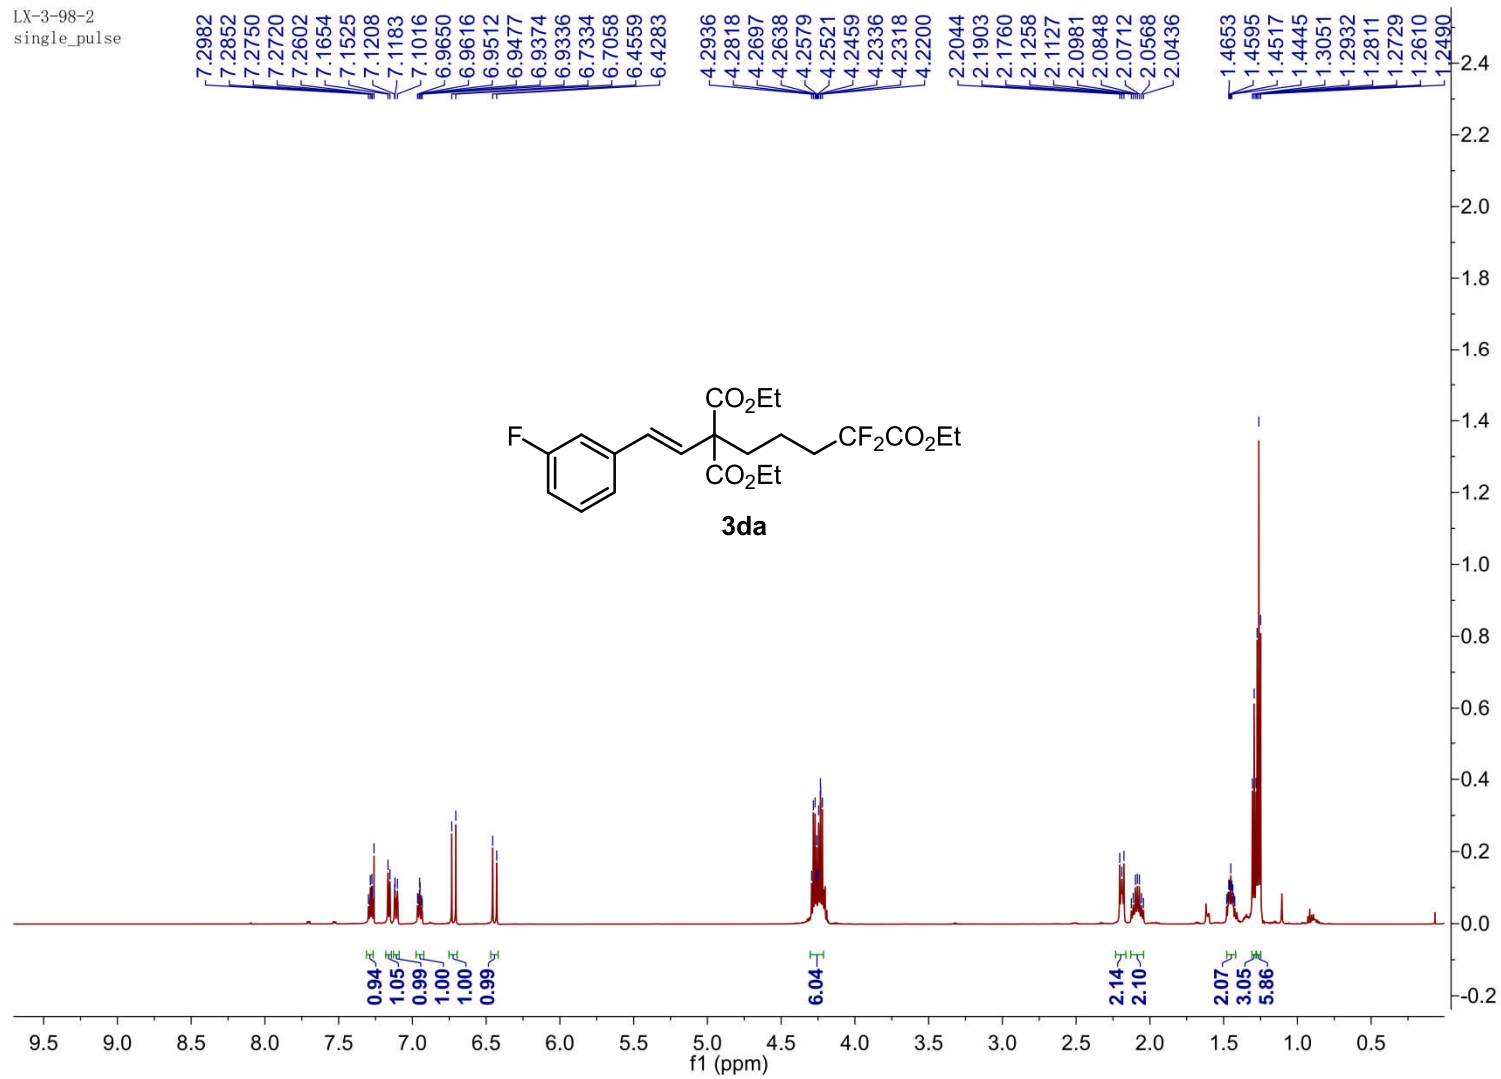

LX-3-98-2  
single\_pulse

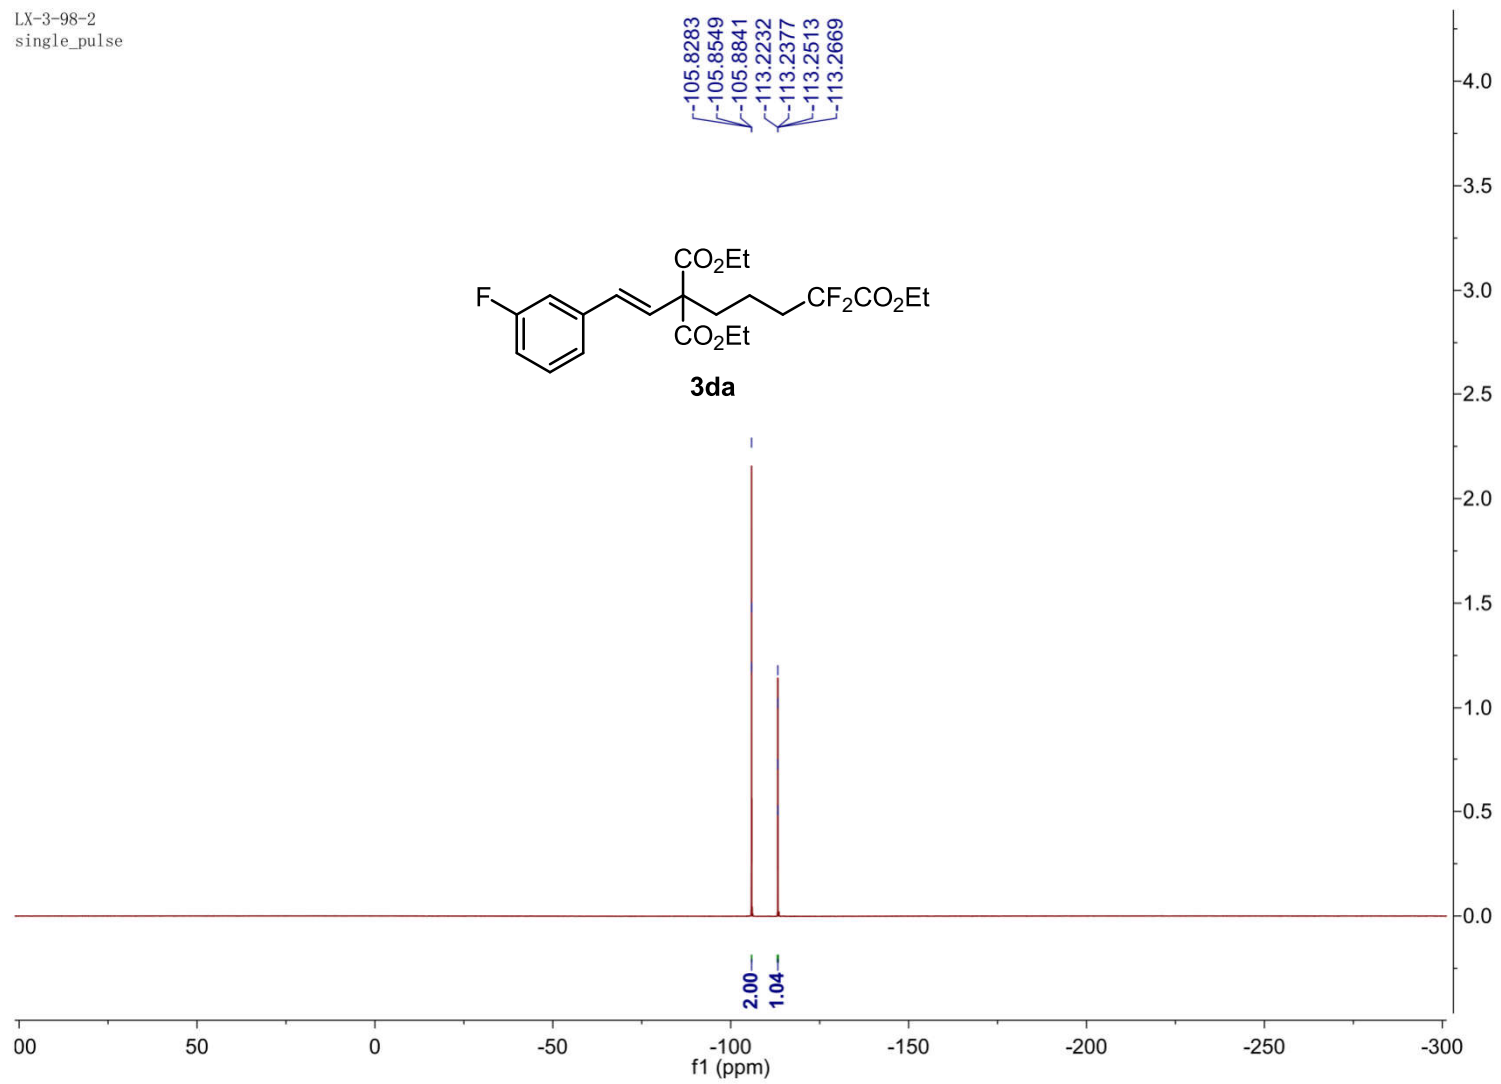

LX-3-98-2

single pulse decoupled gated

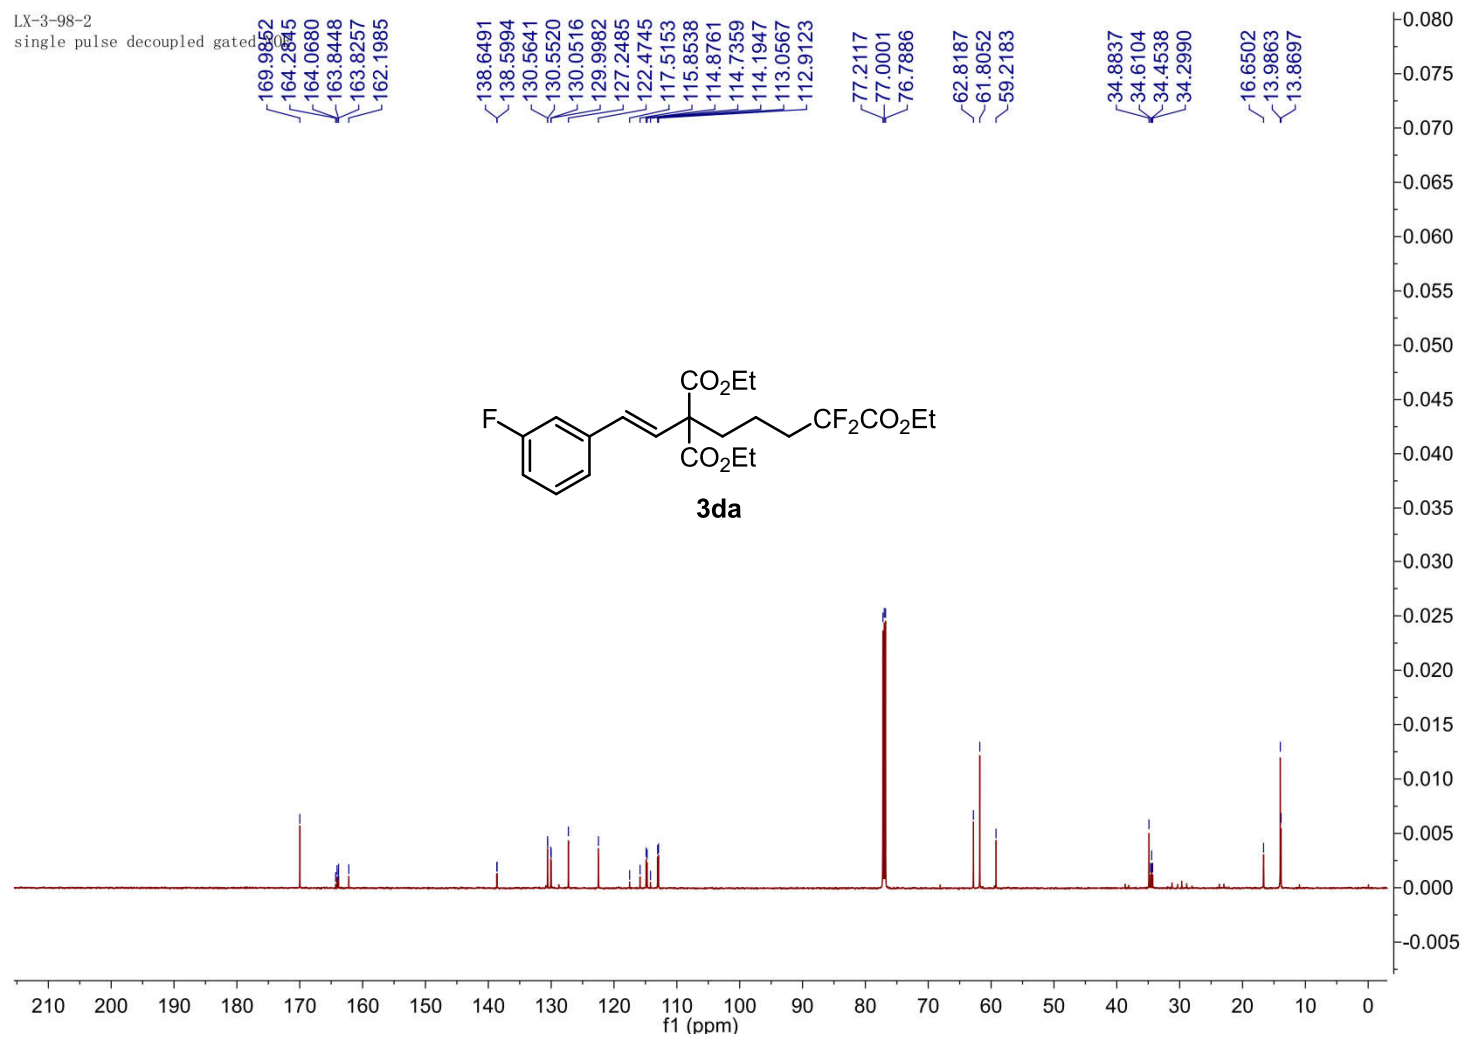

LX-3-80-1  
single\_pulse

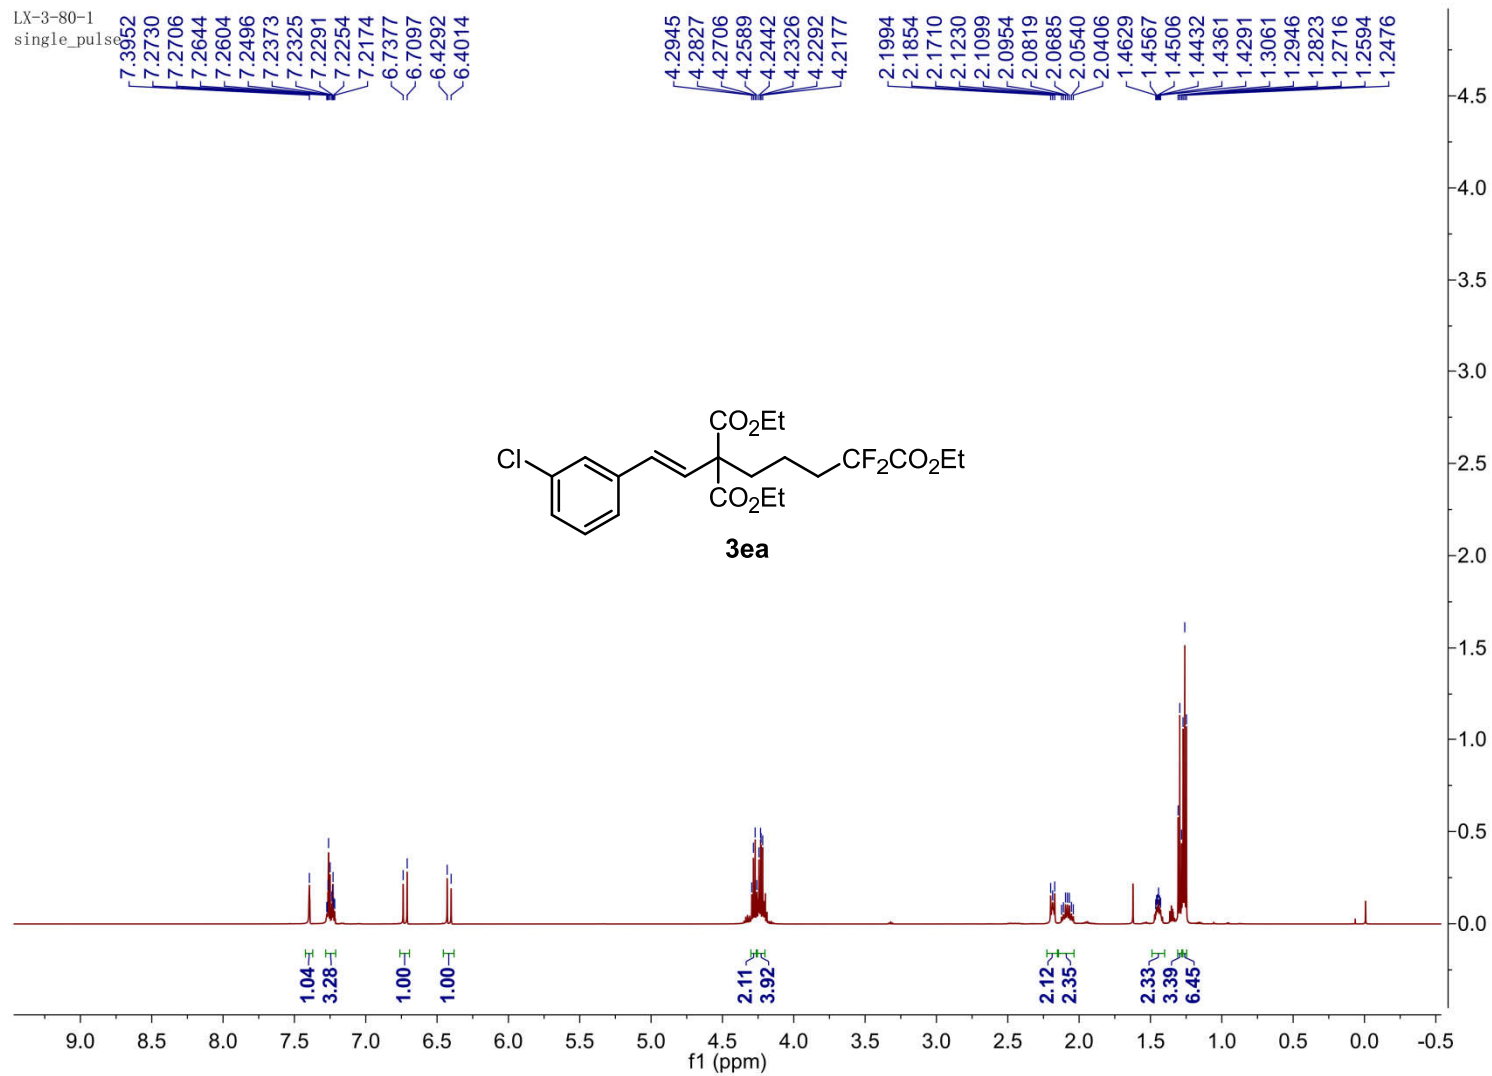

LX-3-80-1  
single\_pulse

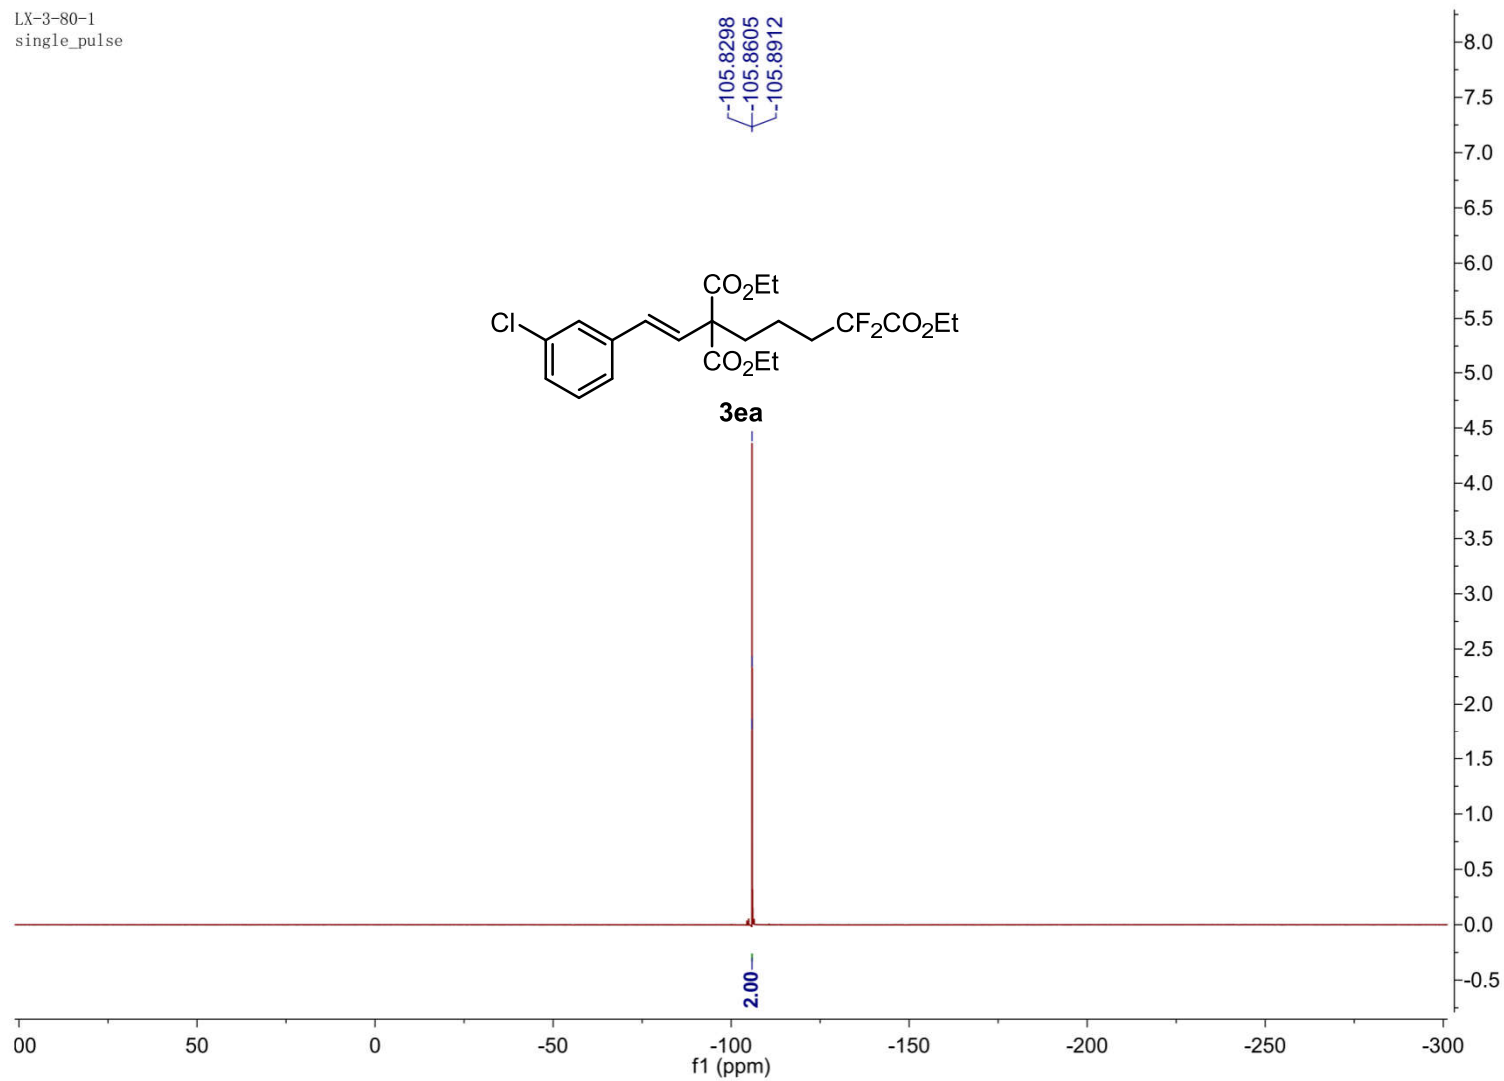

LX-3-80-1  
single pulse decoupled gated NOE

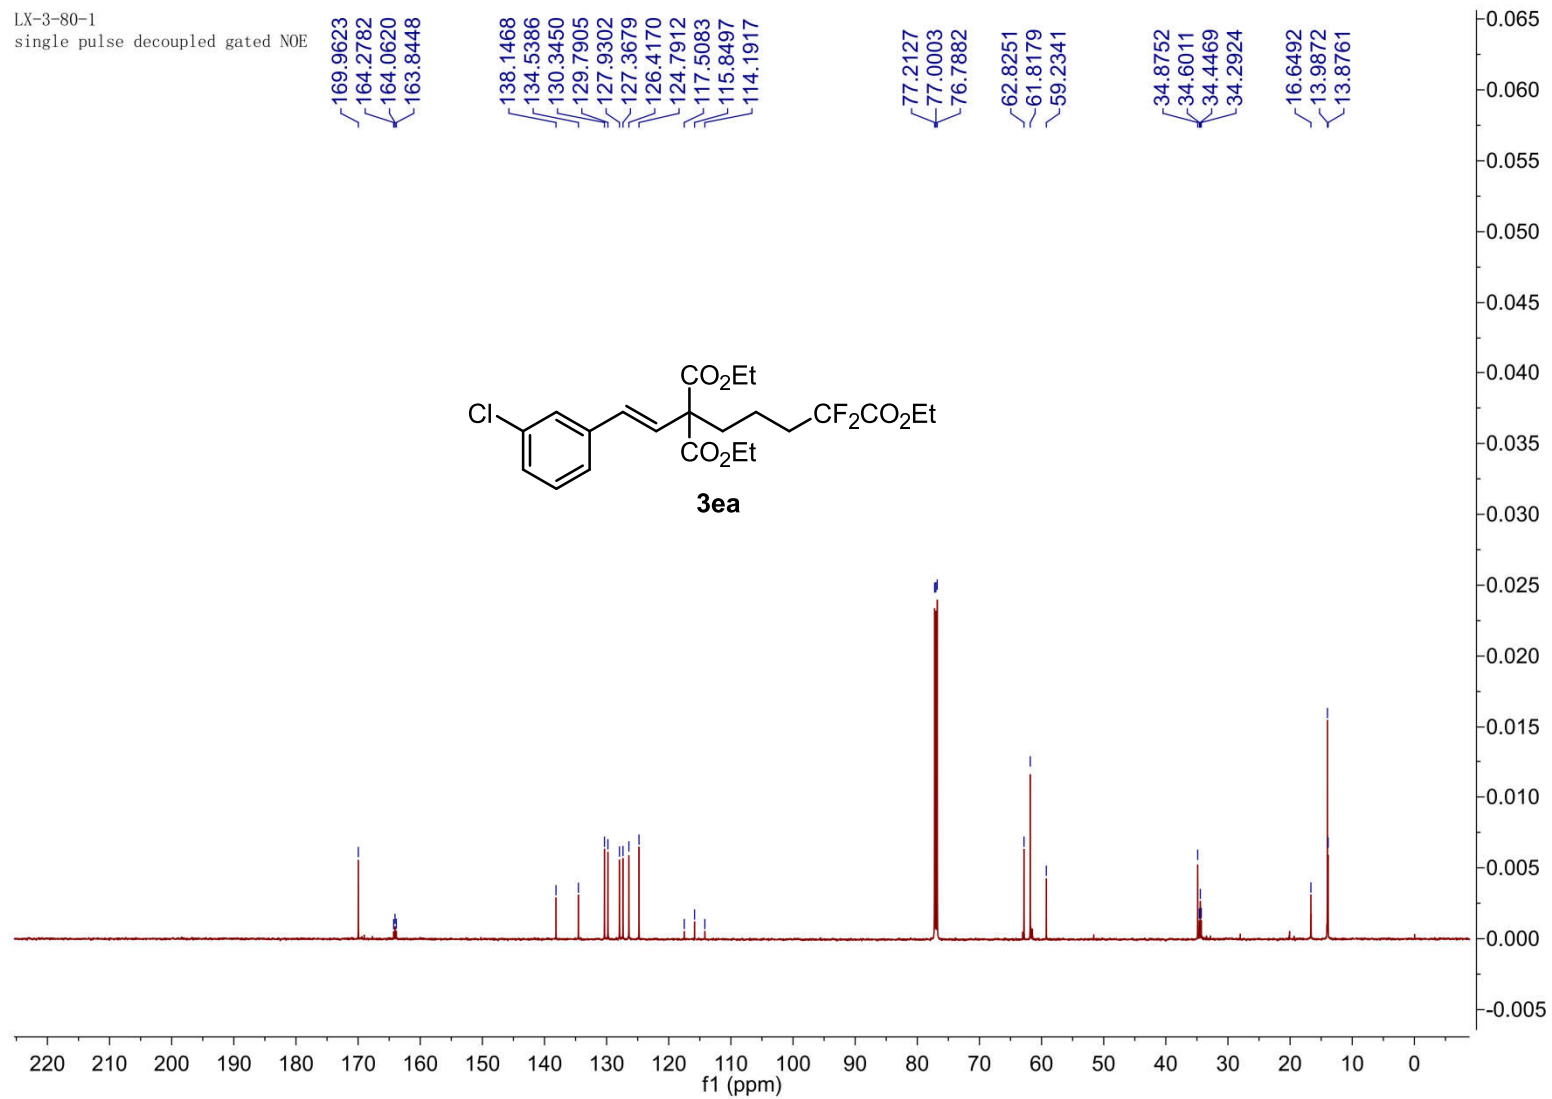



LX-3-84-1  
single\_pulse

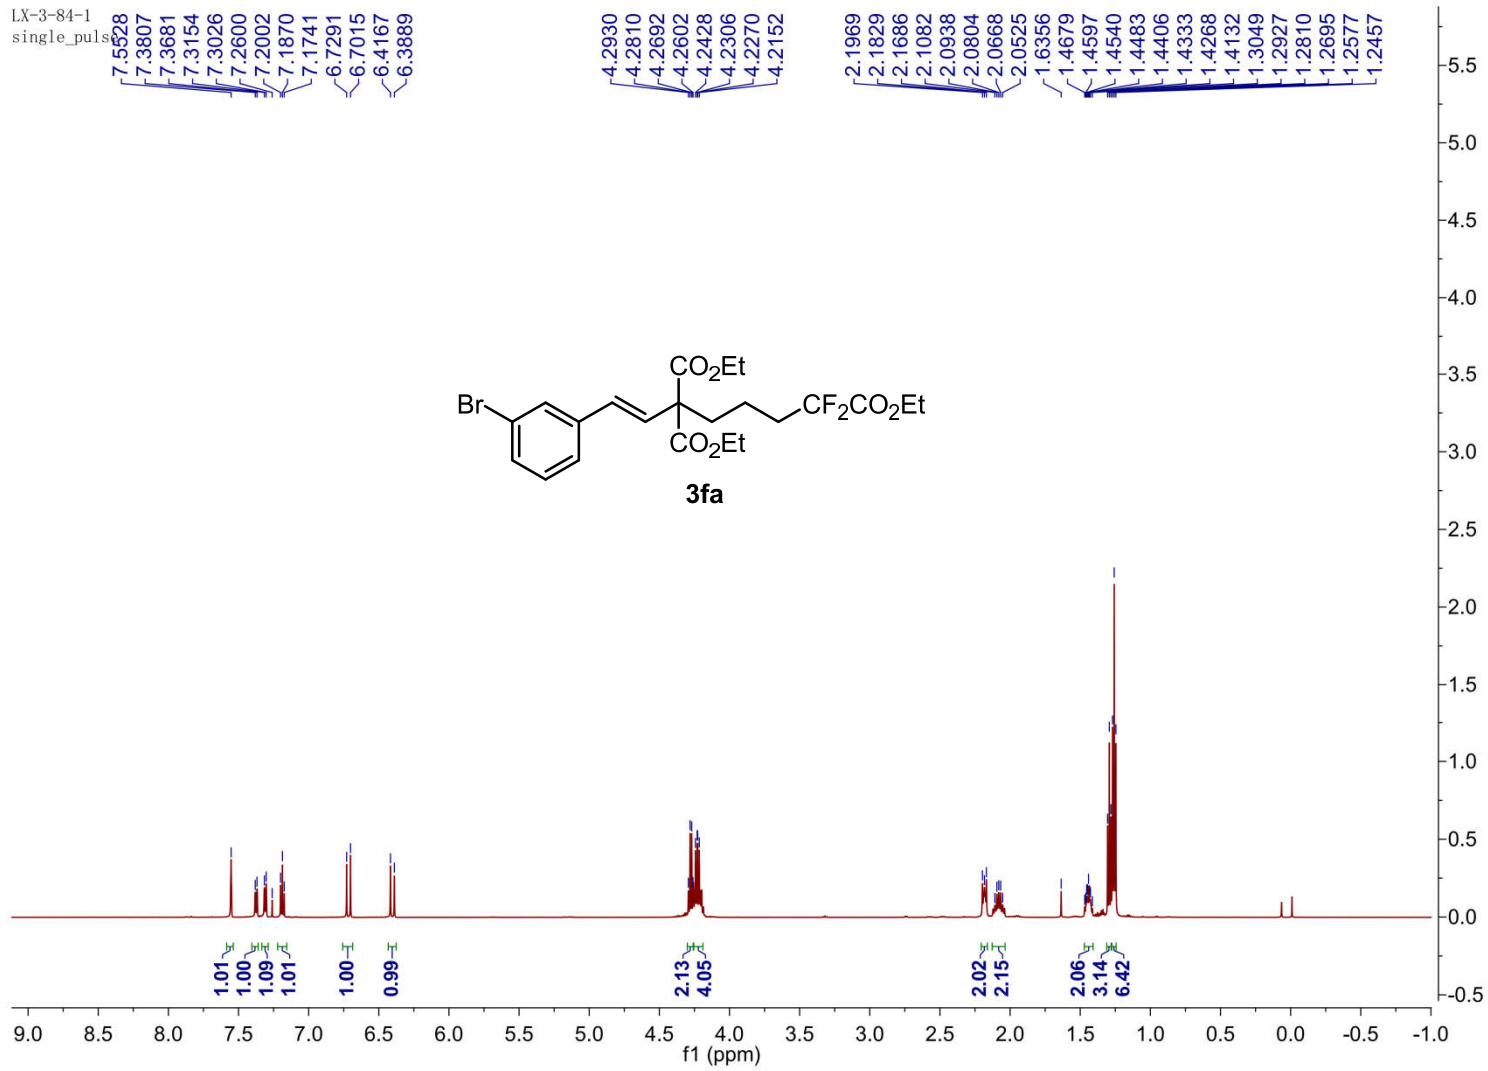

LX-3-84-1  
single\_pulse

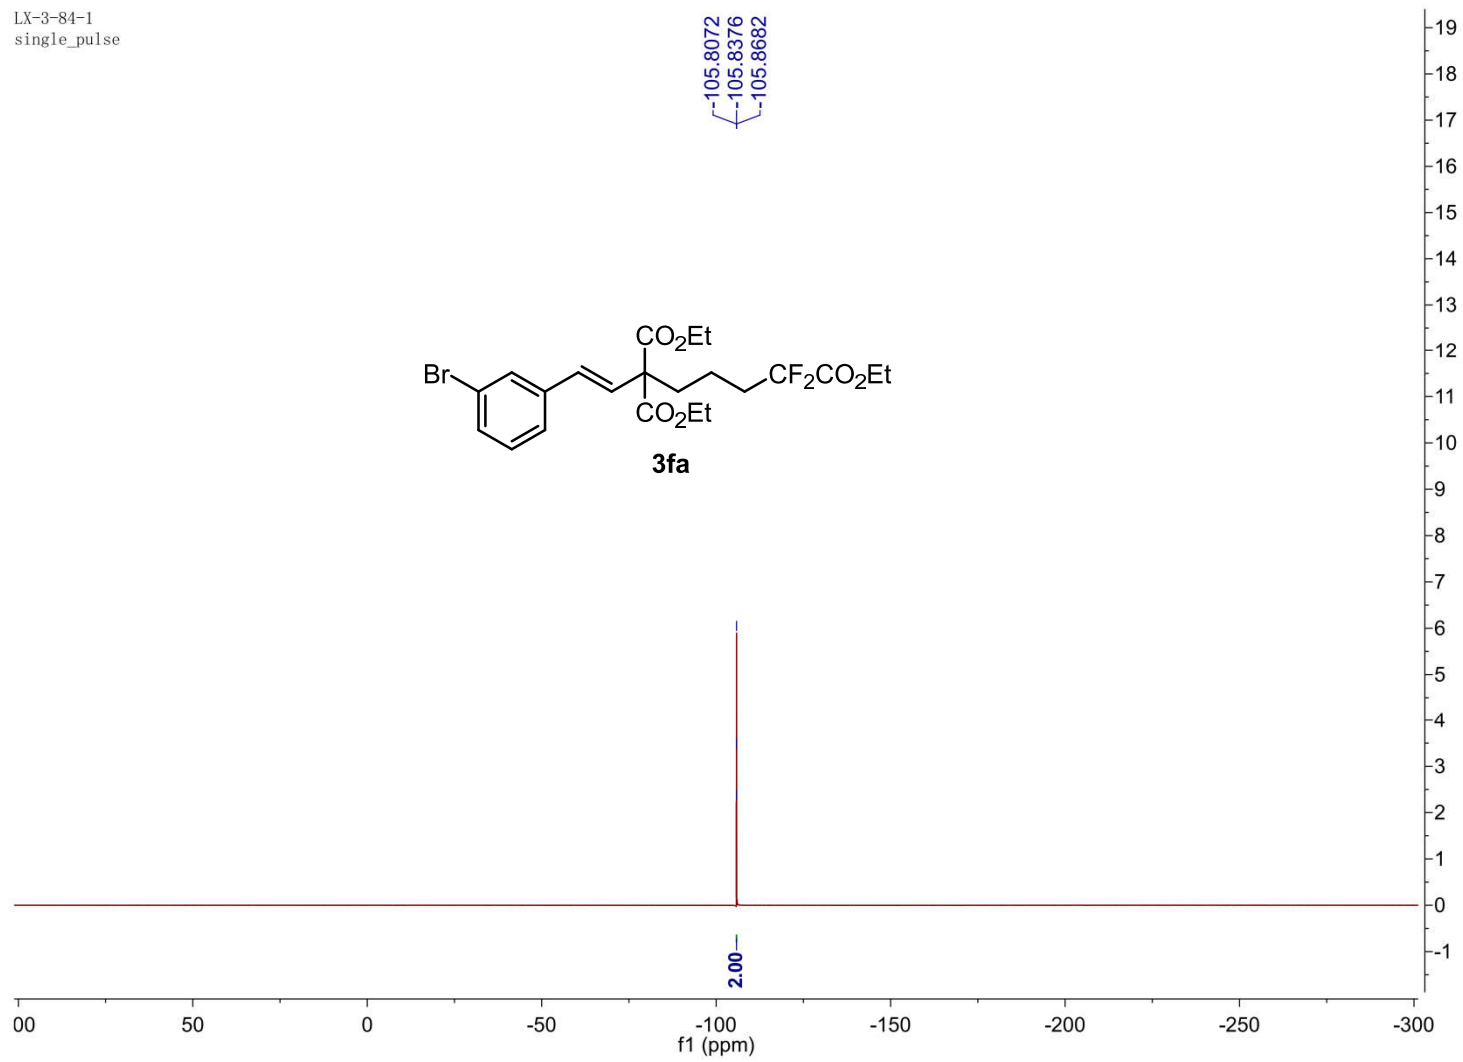

LX-3-84-1  
single pulse decoupled gated NOE

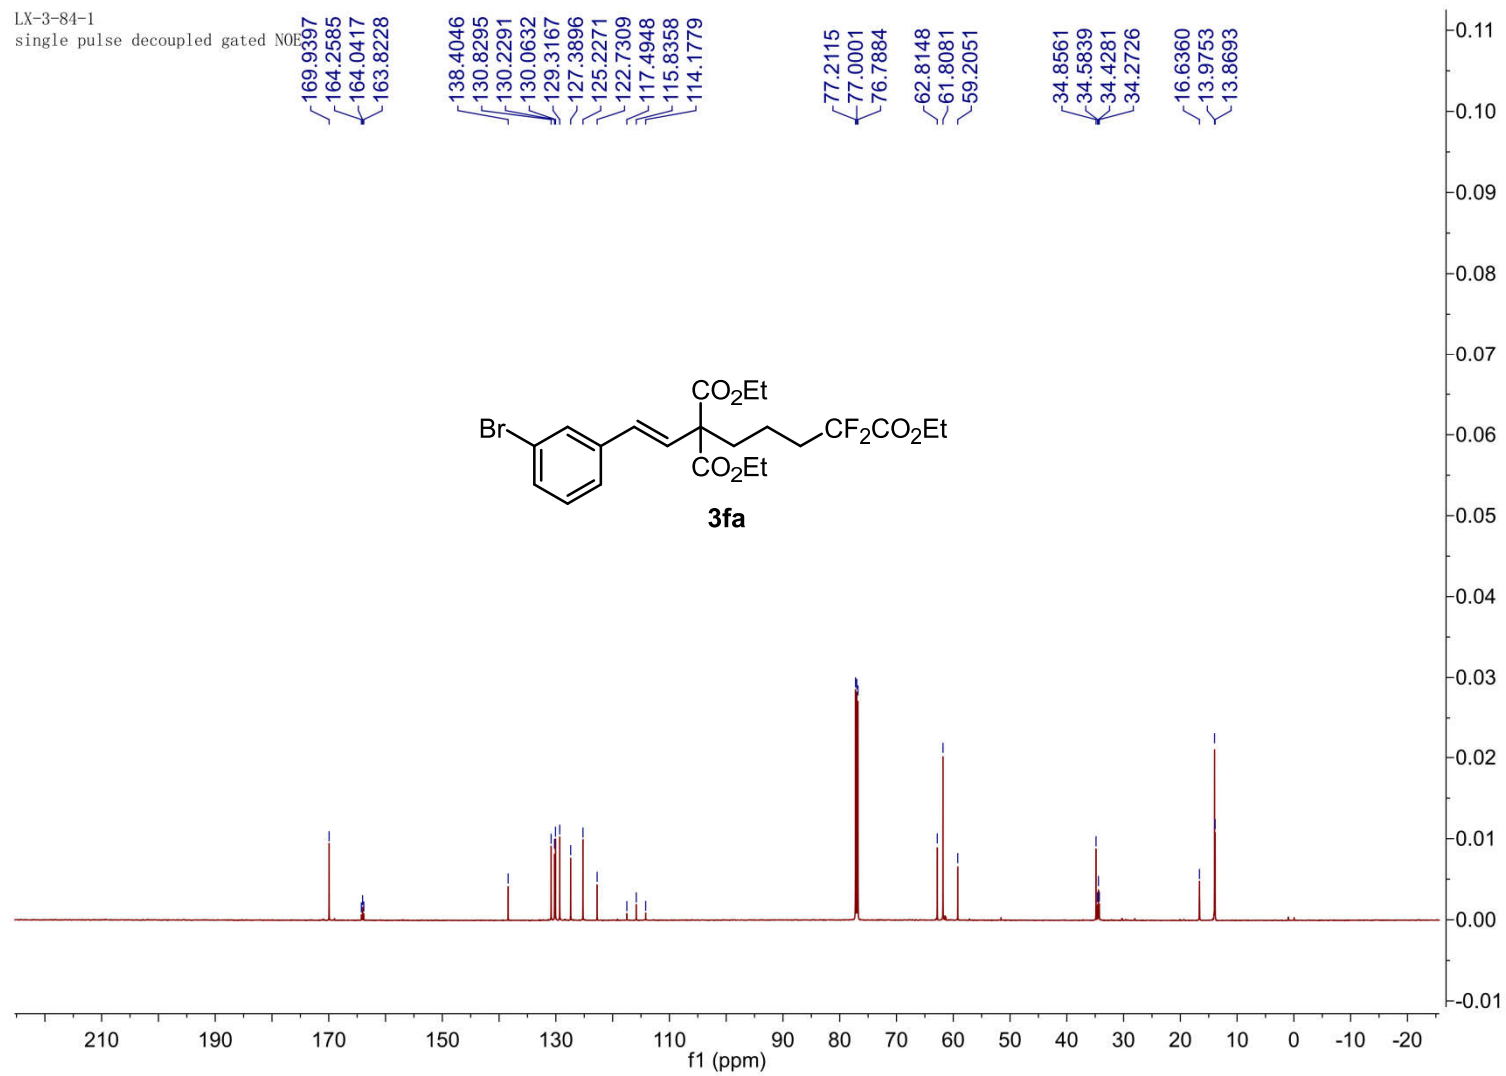

LX-3-81-2  
single\_p

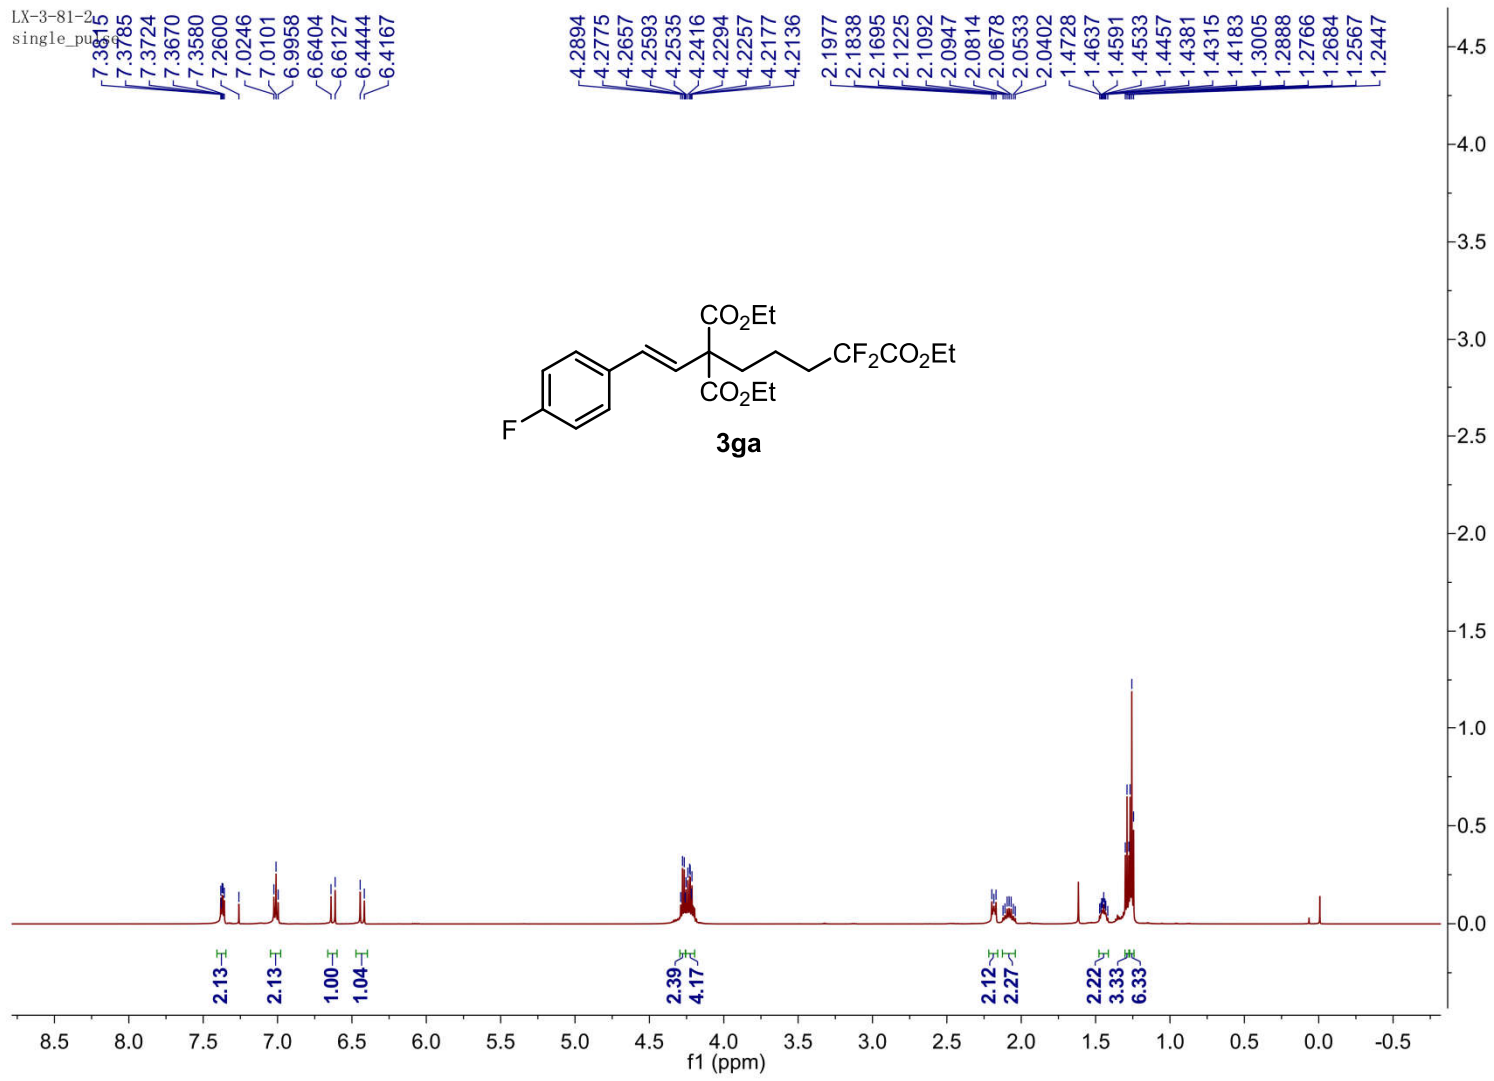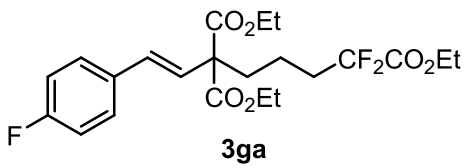

LX-3-81-2  
single\_pulse

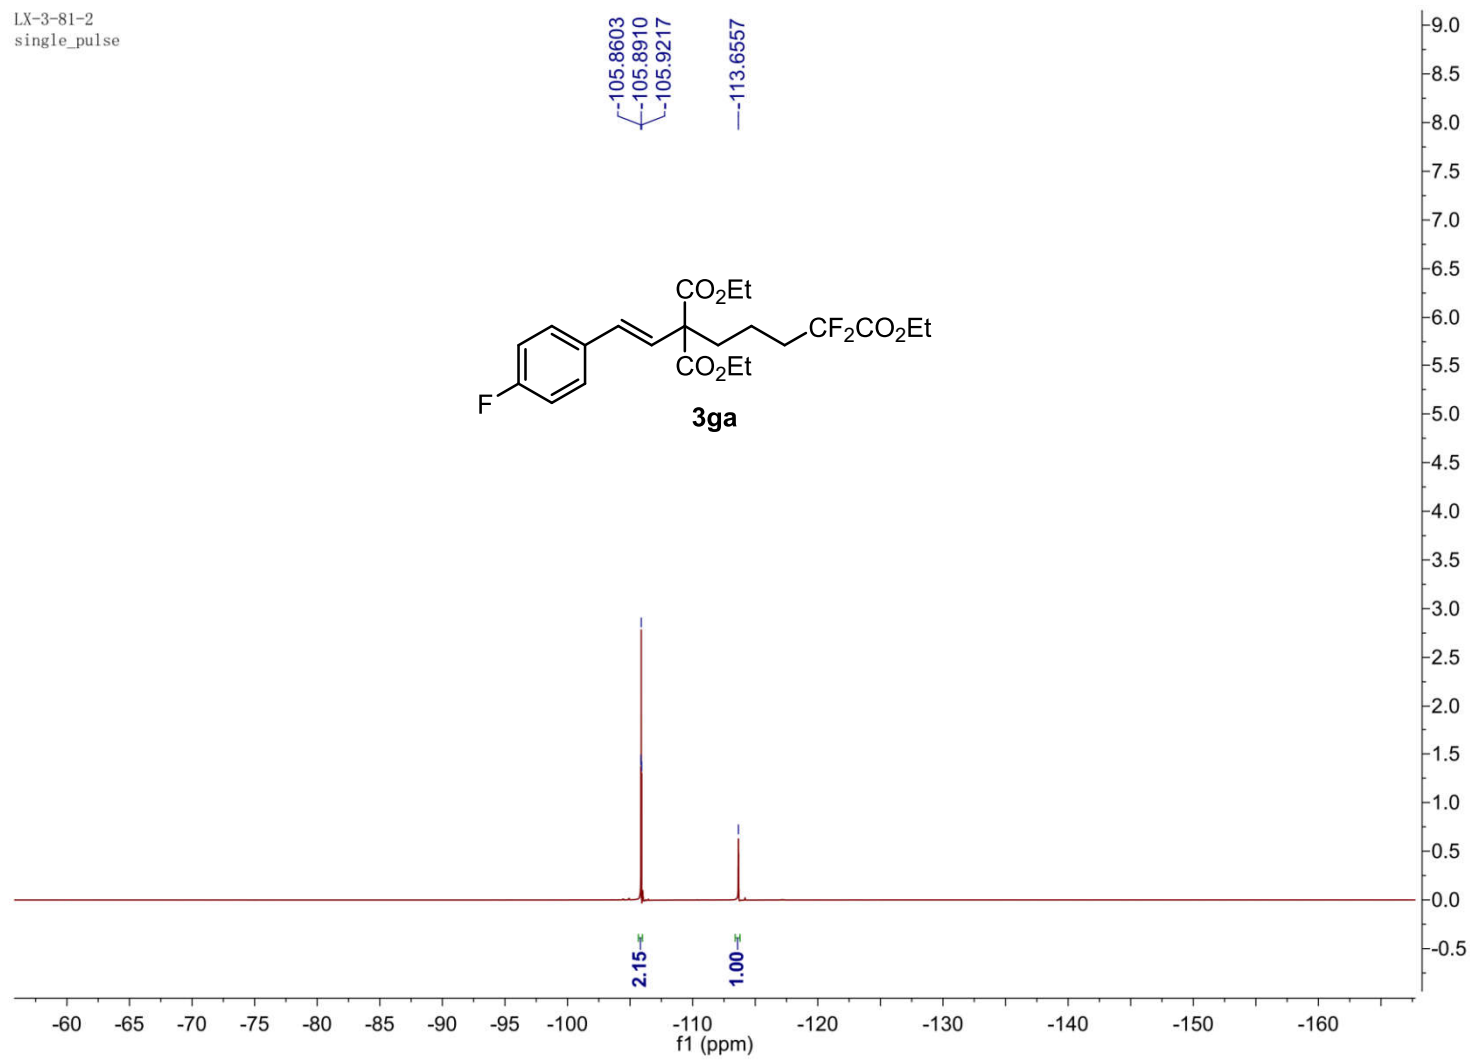

LX-3-81-2  
single pulse decoupled gated N

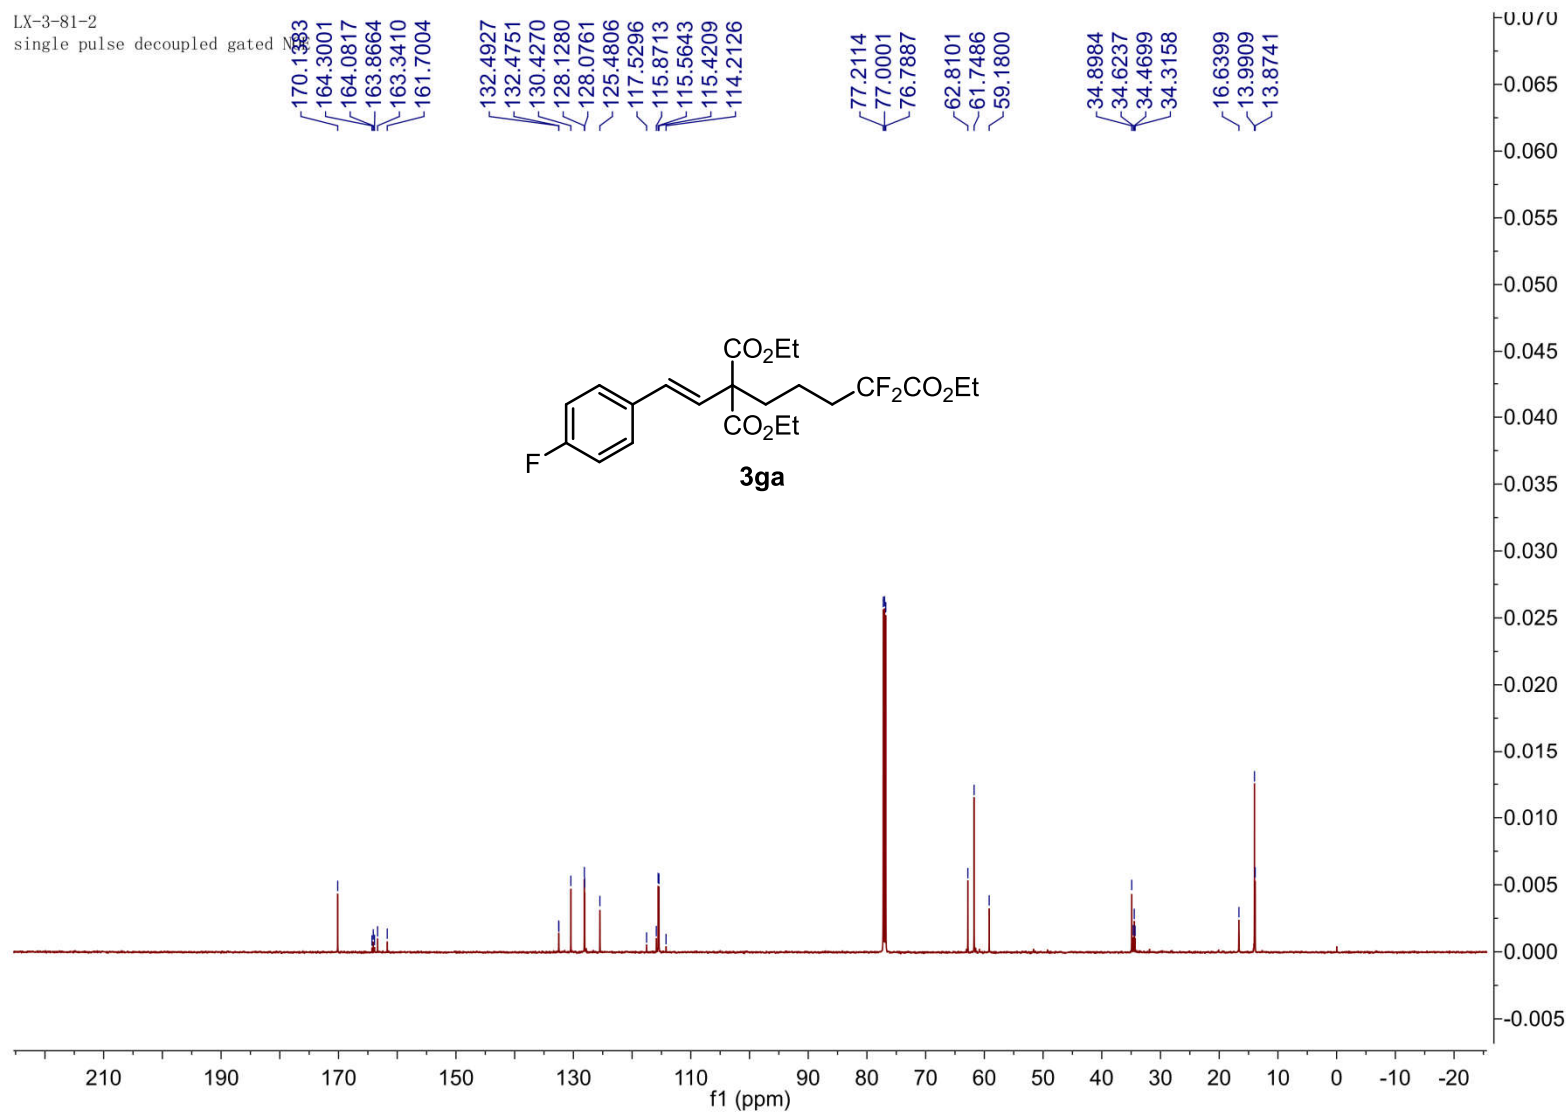

LX-3-82-4  
single\_pulse

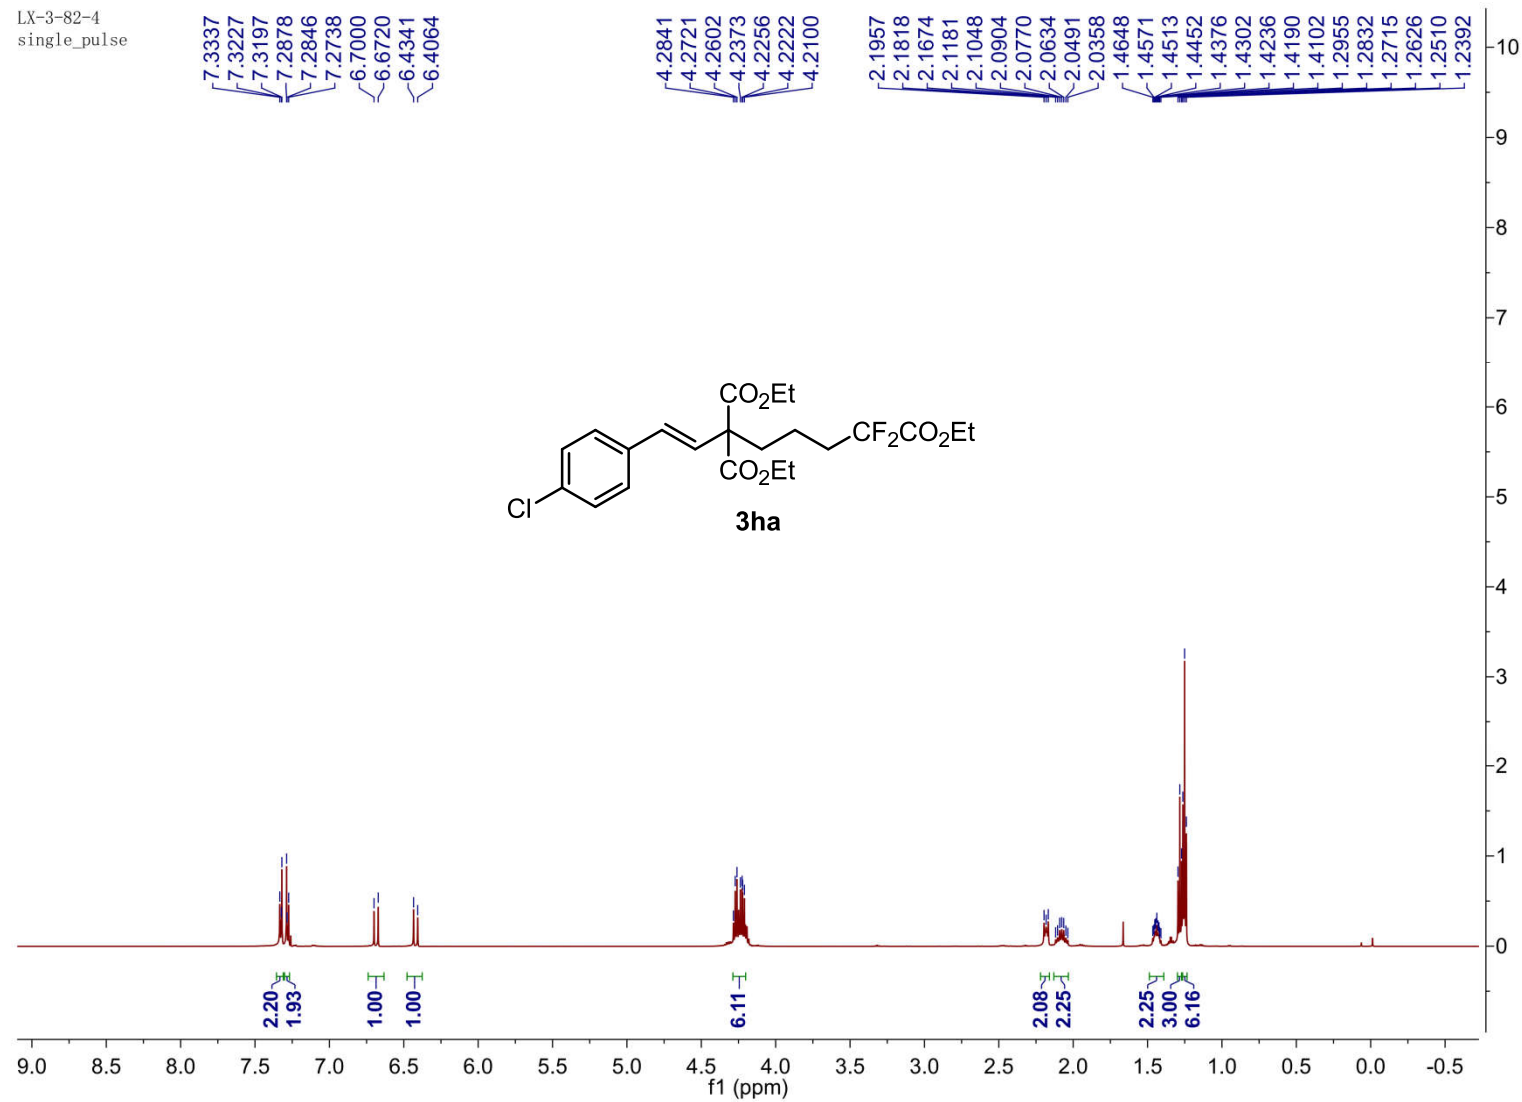

LX-3-82-4  
single\_pulse

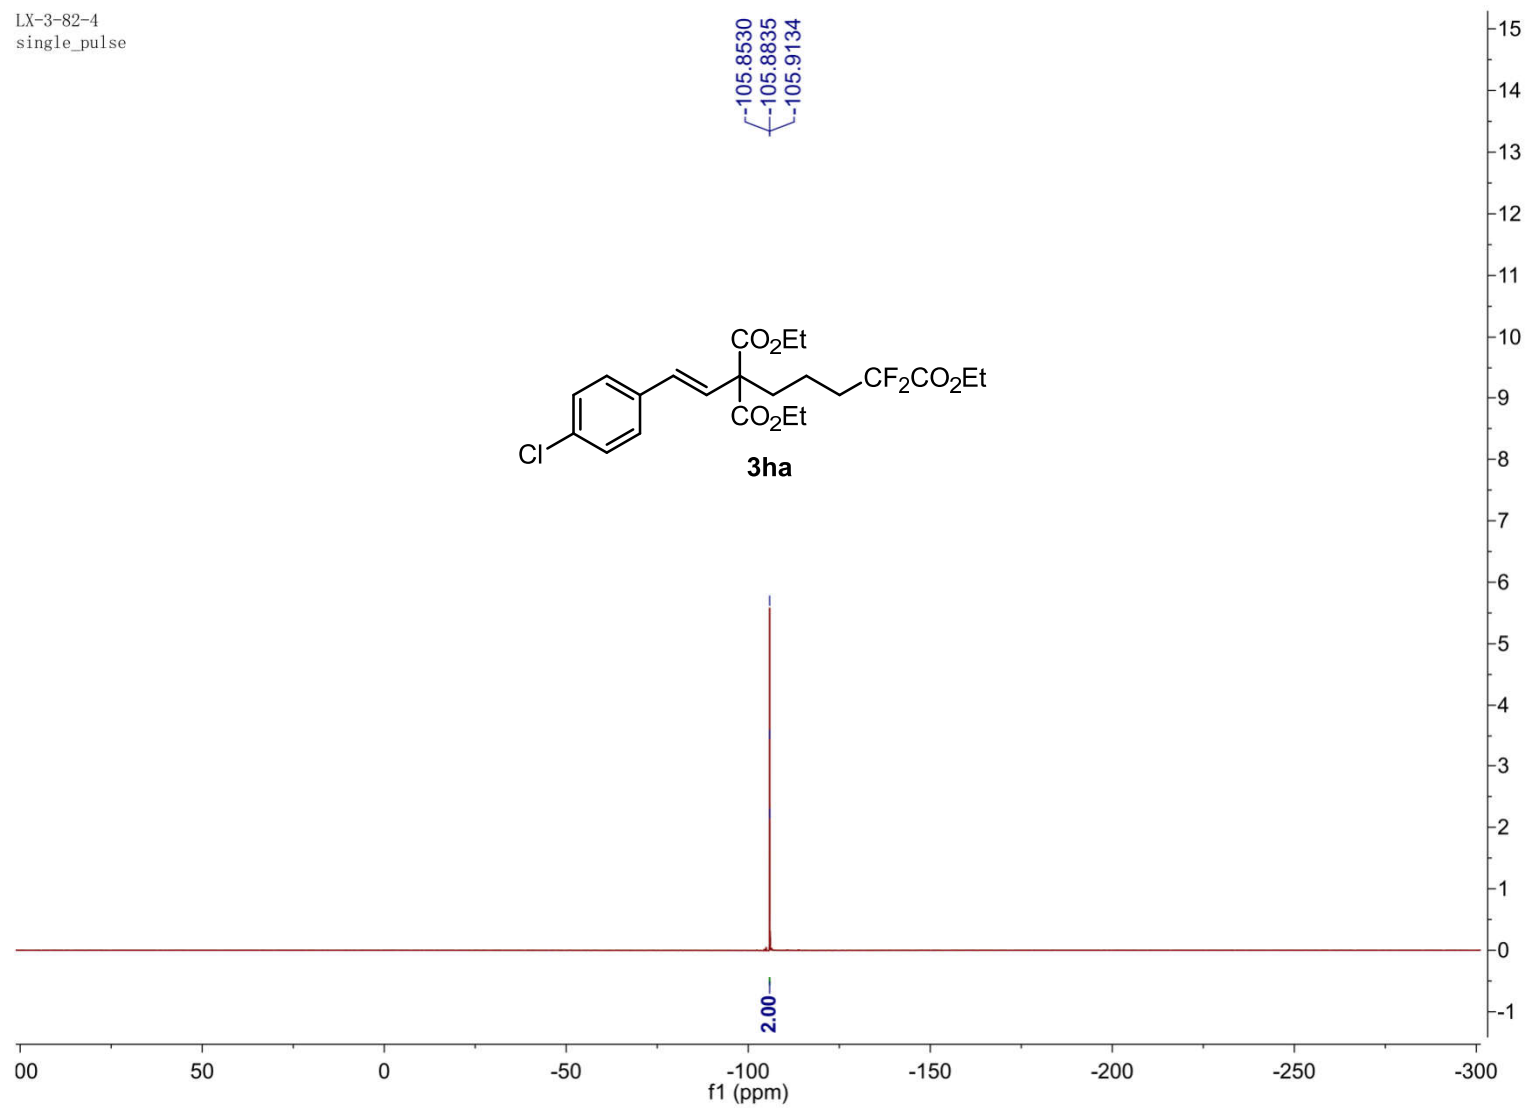



LX-3-82-4  
single pulse decoupled gated NOE

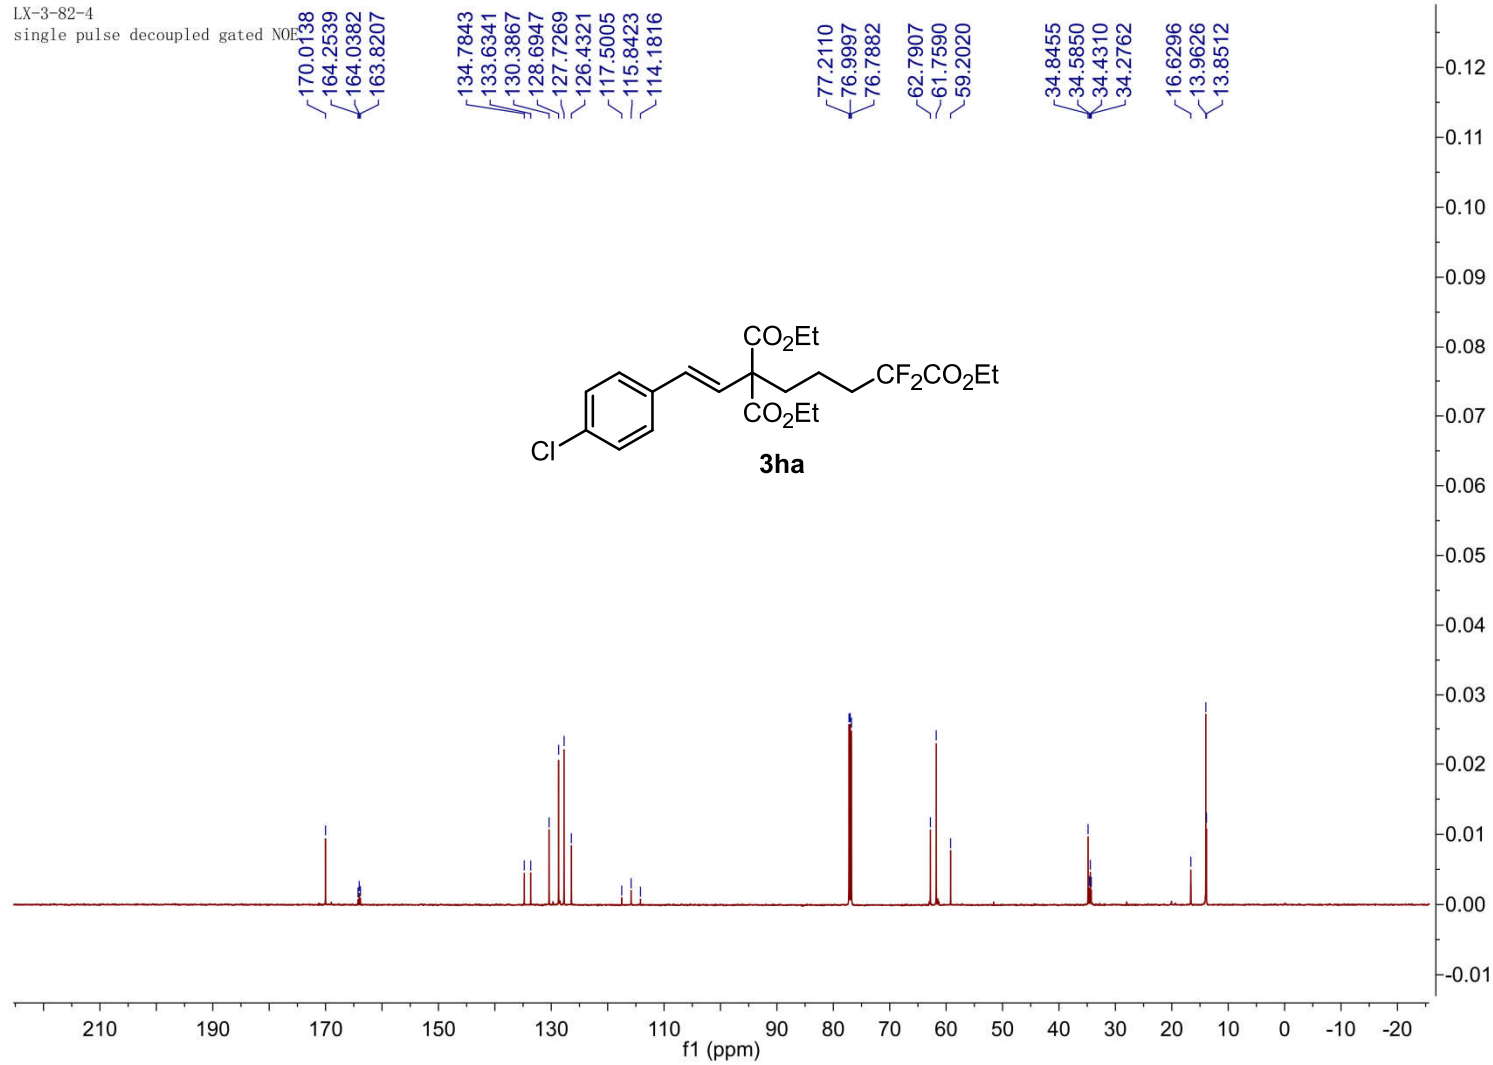

LX-3-80-2  
single\_pulse

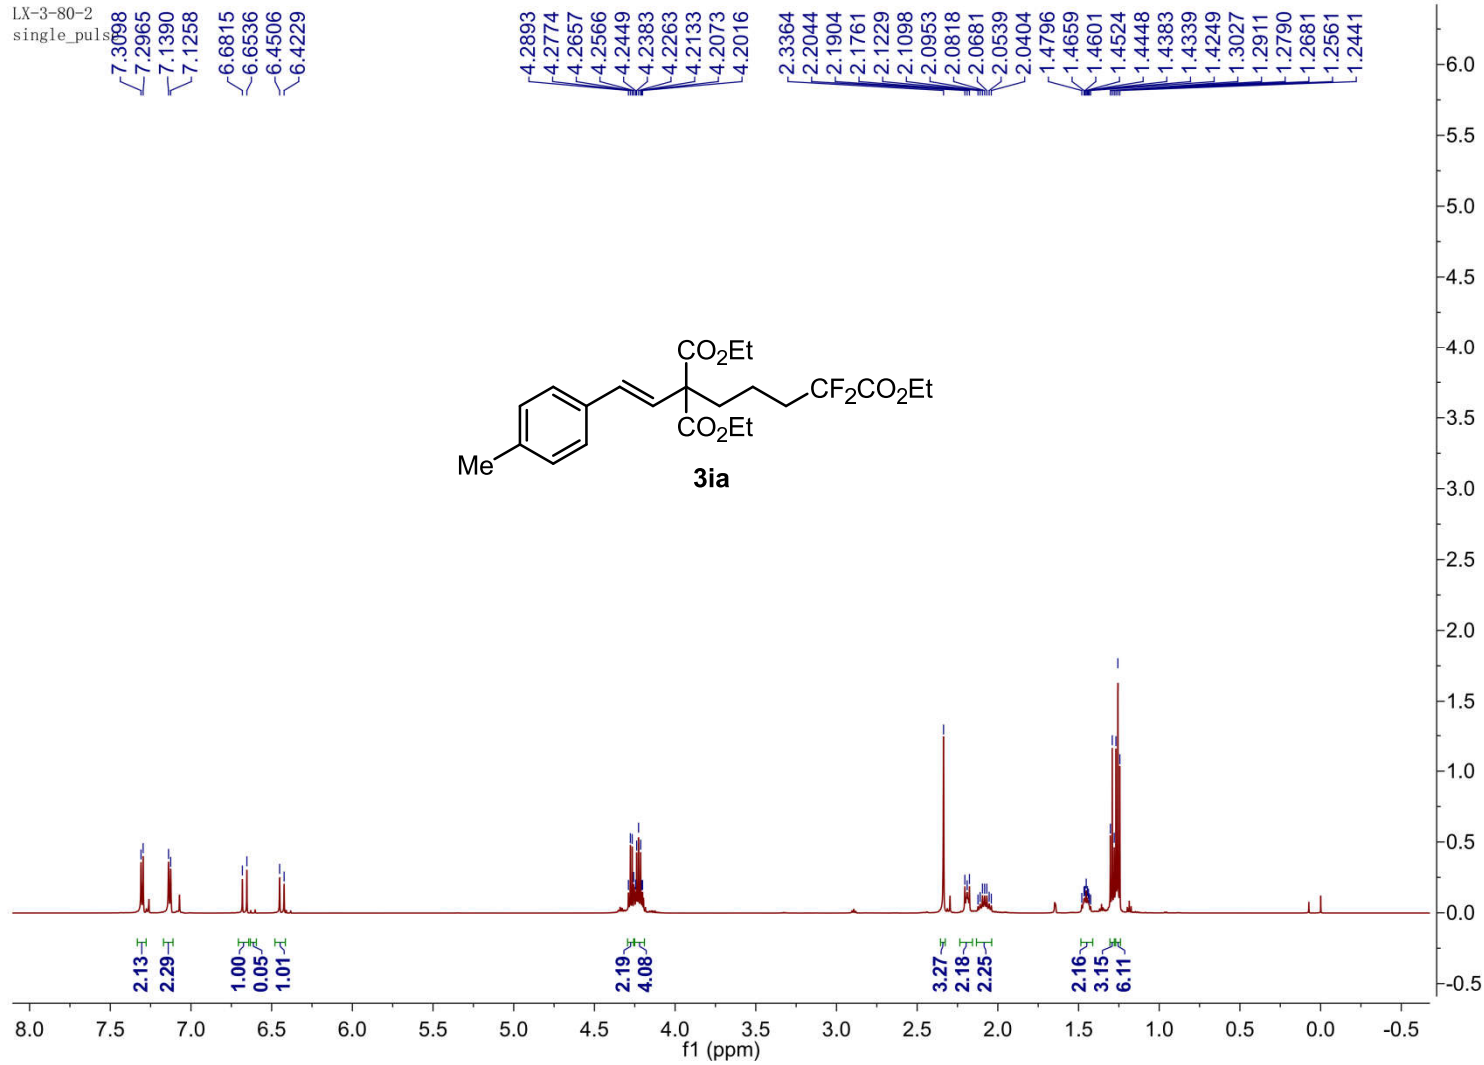

LX-3-80-2  
single\_pulse

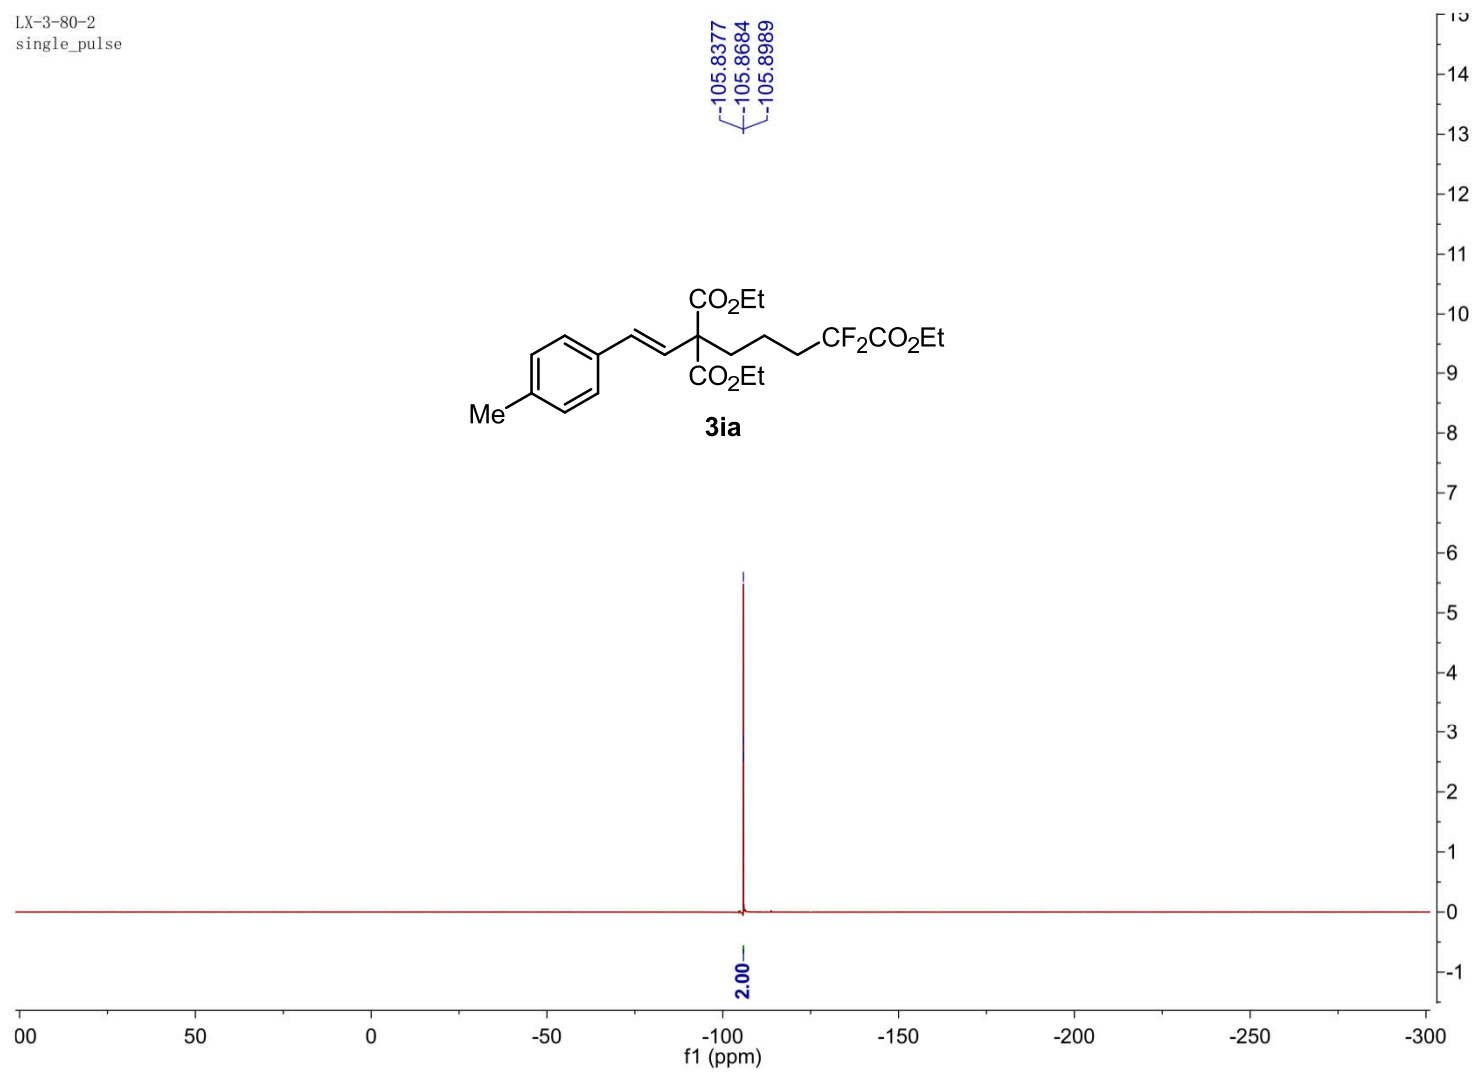

LX-3-80-2  
single pulse decoupled gated NOE

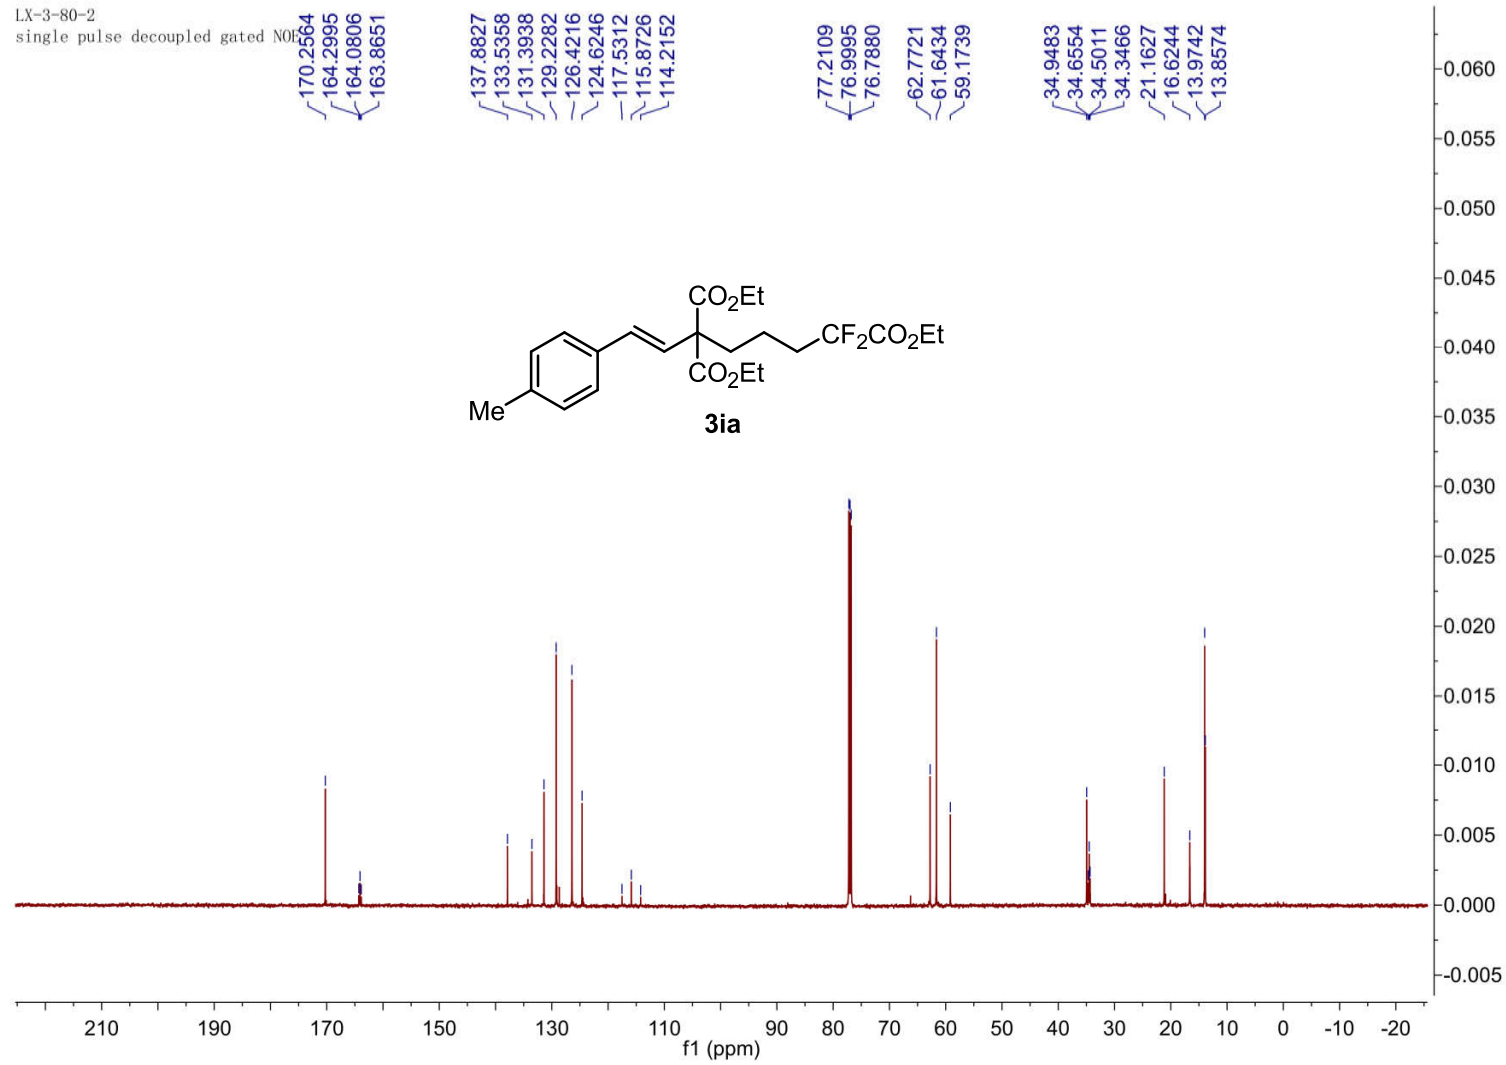

LX-3-81-3  
single\_pulse

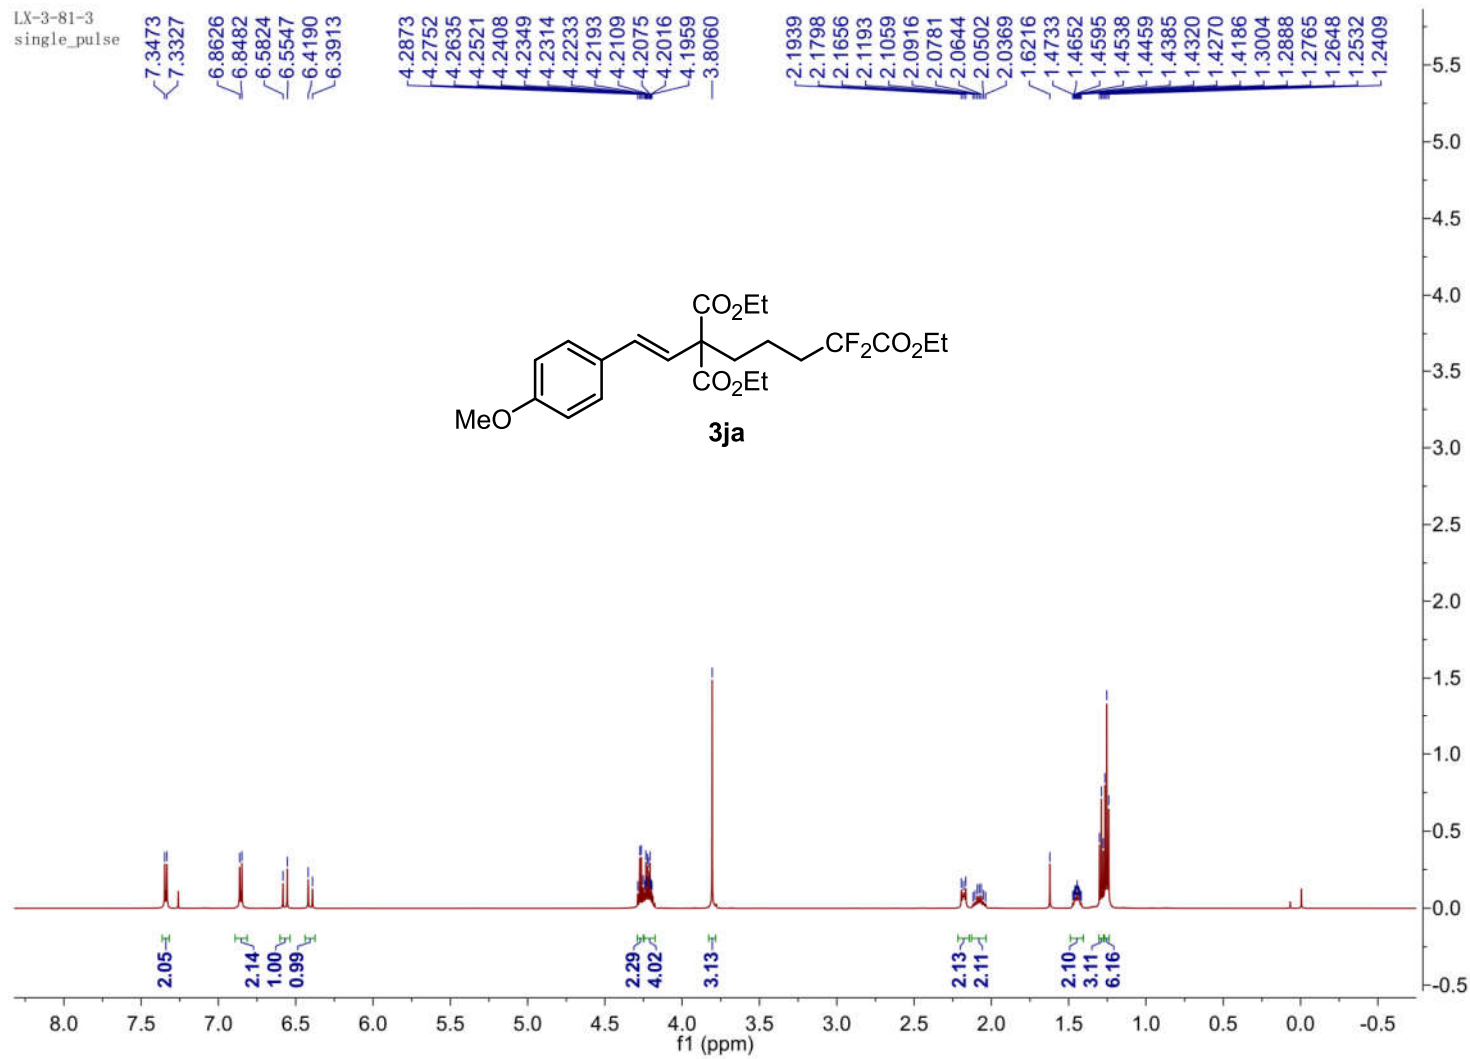

LX-3-81-3  
single\_pulse

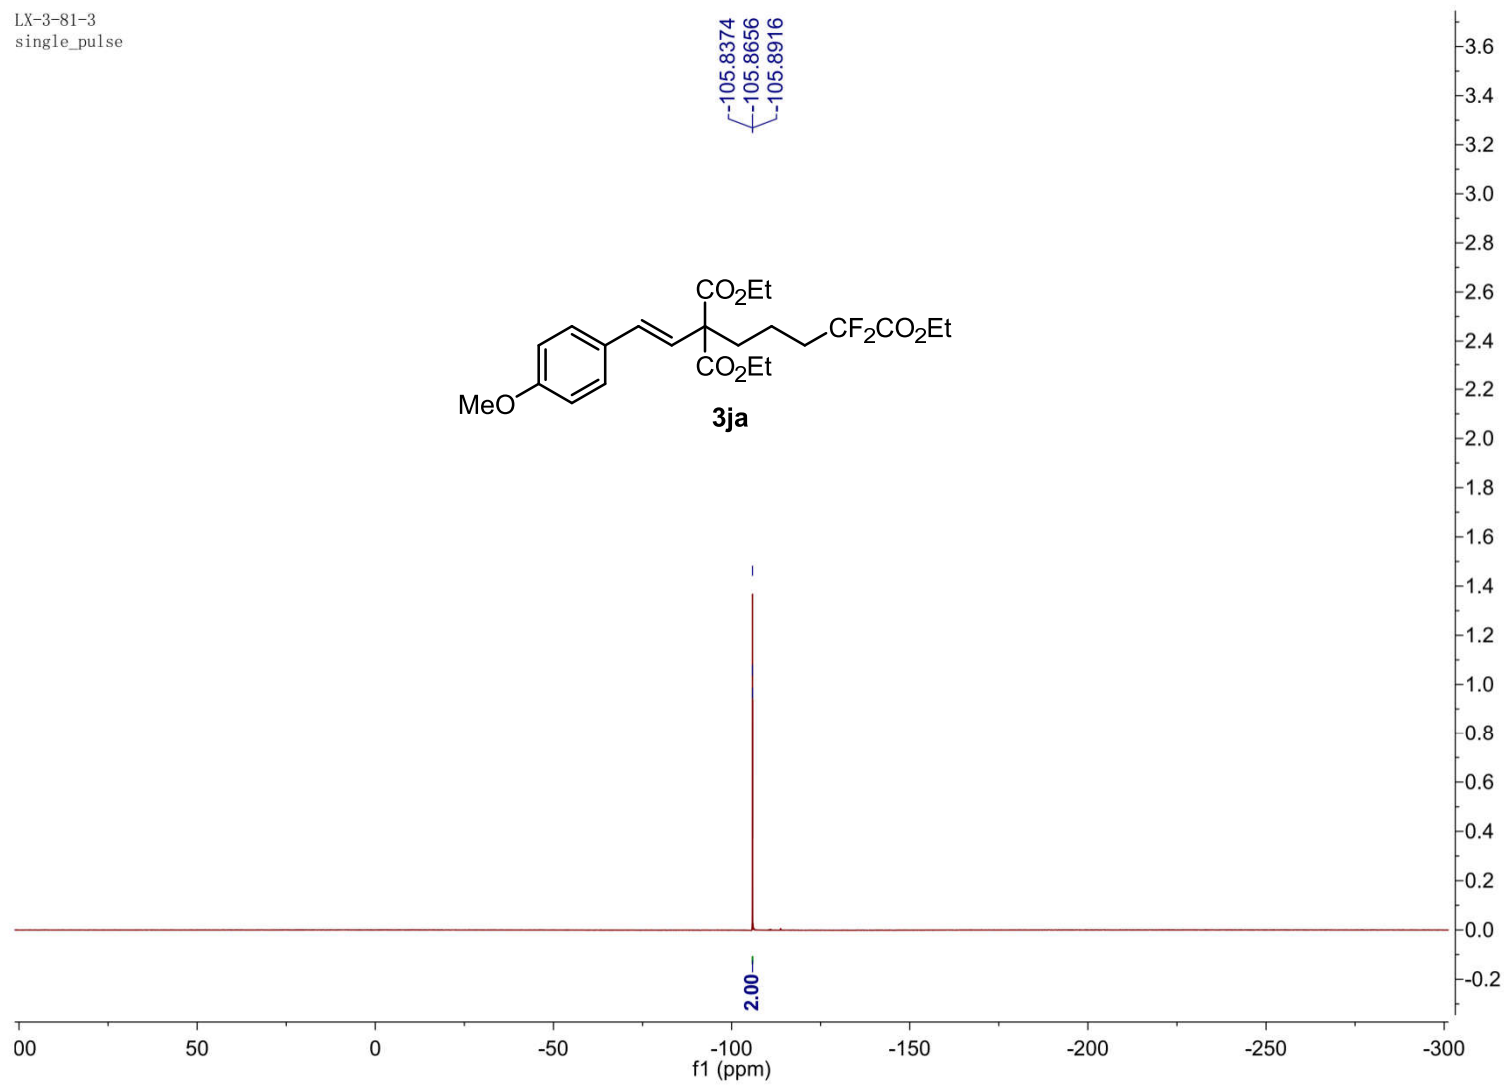

LX-3-81-3

single pulse decoupled gated NOE

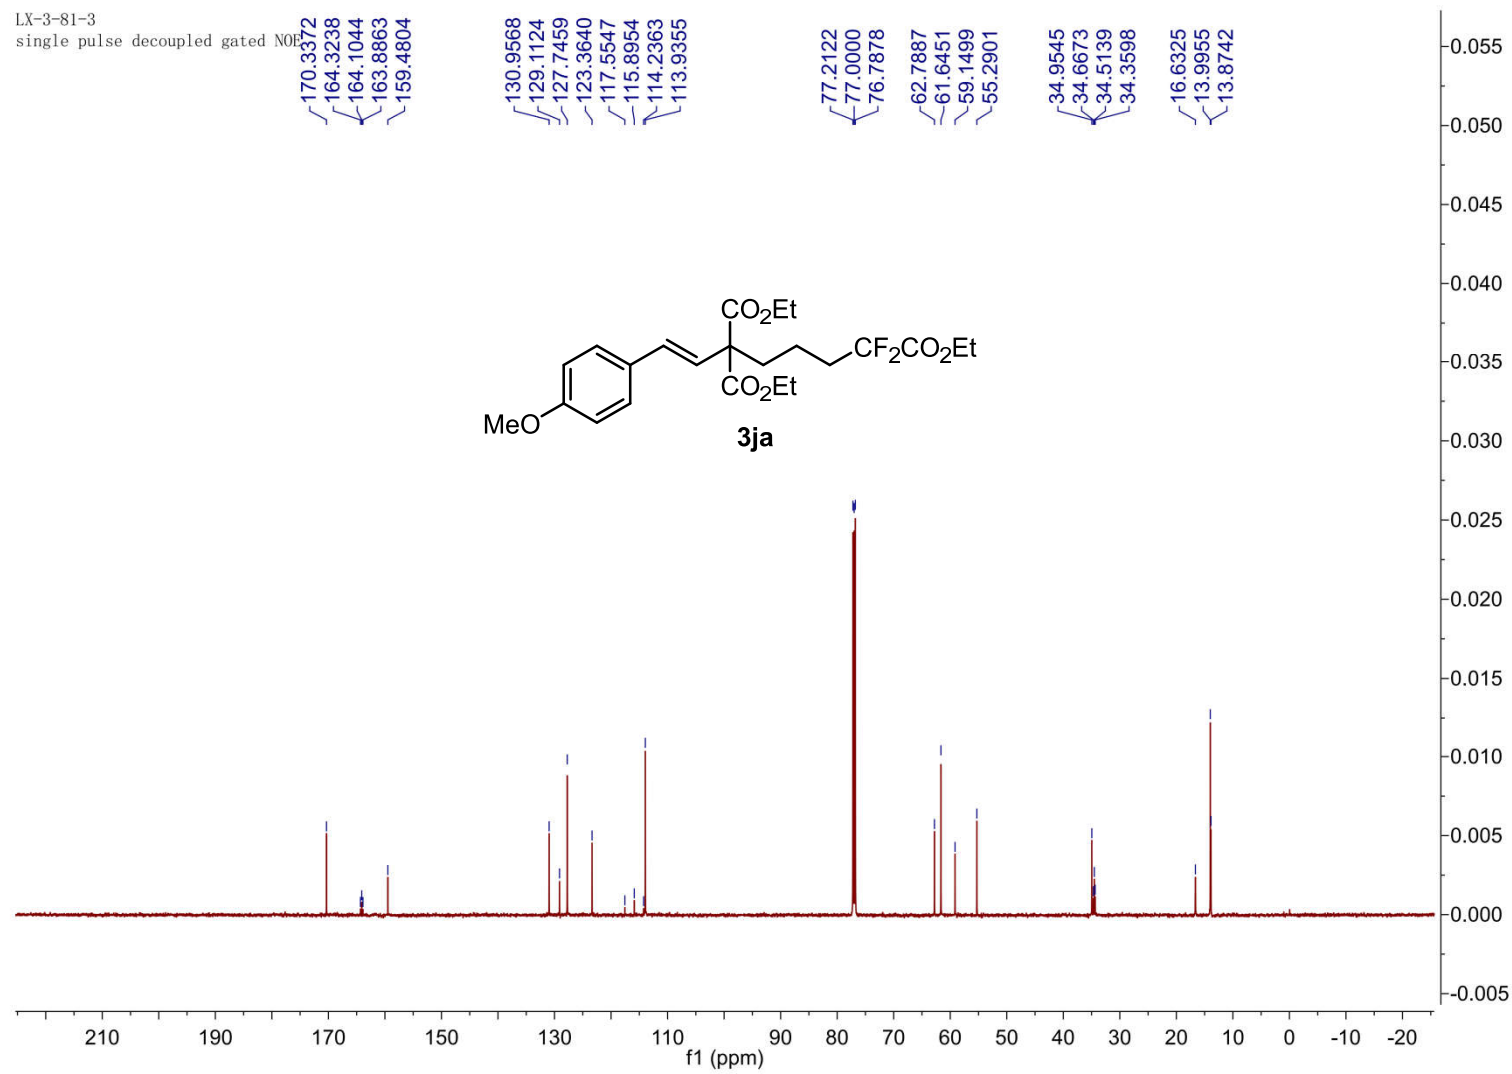

LX-3-82-1  
single\_pulse

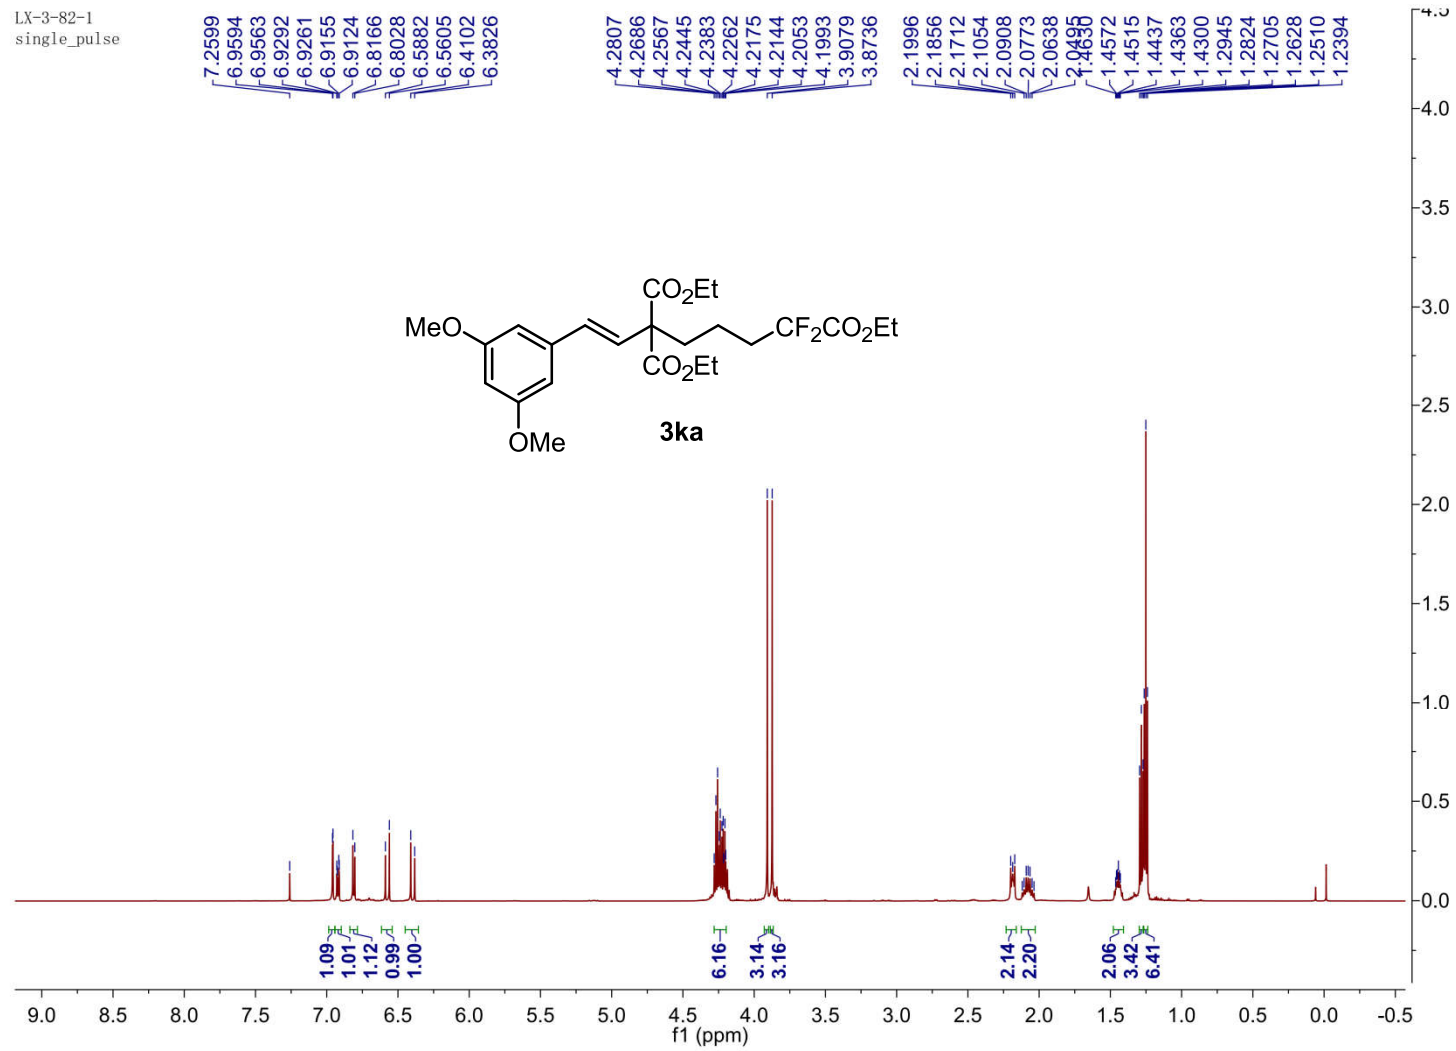



LX-3-82-1  
single\_pulse

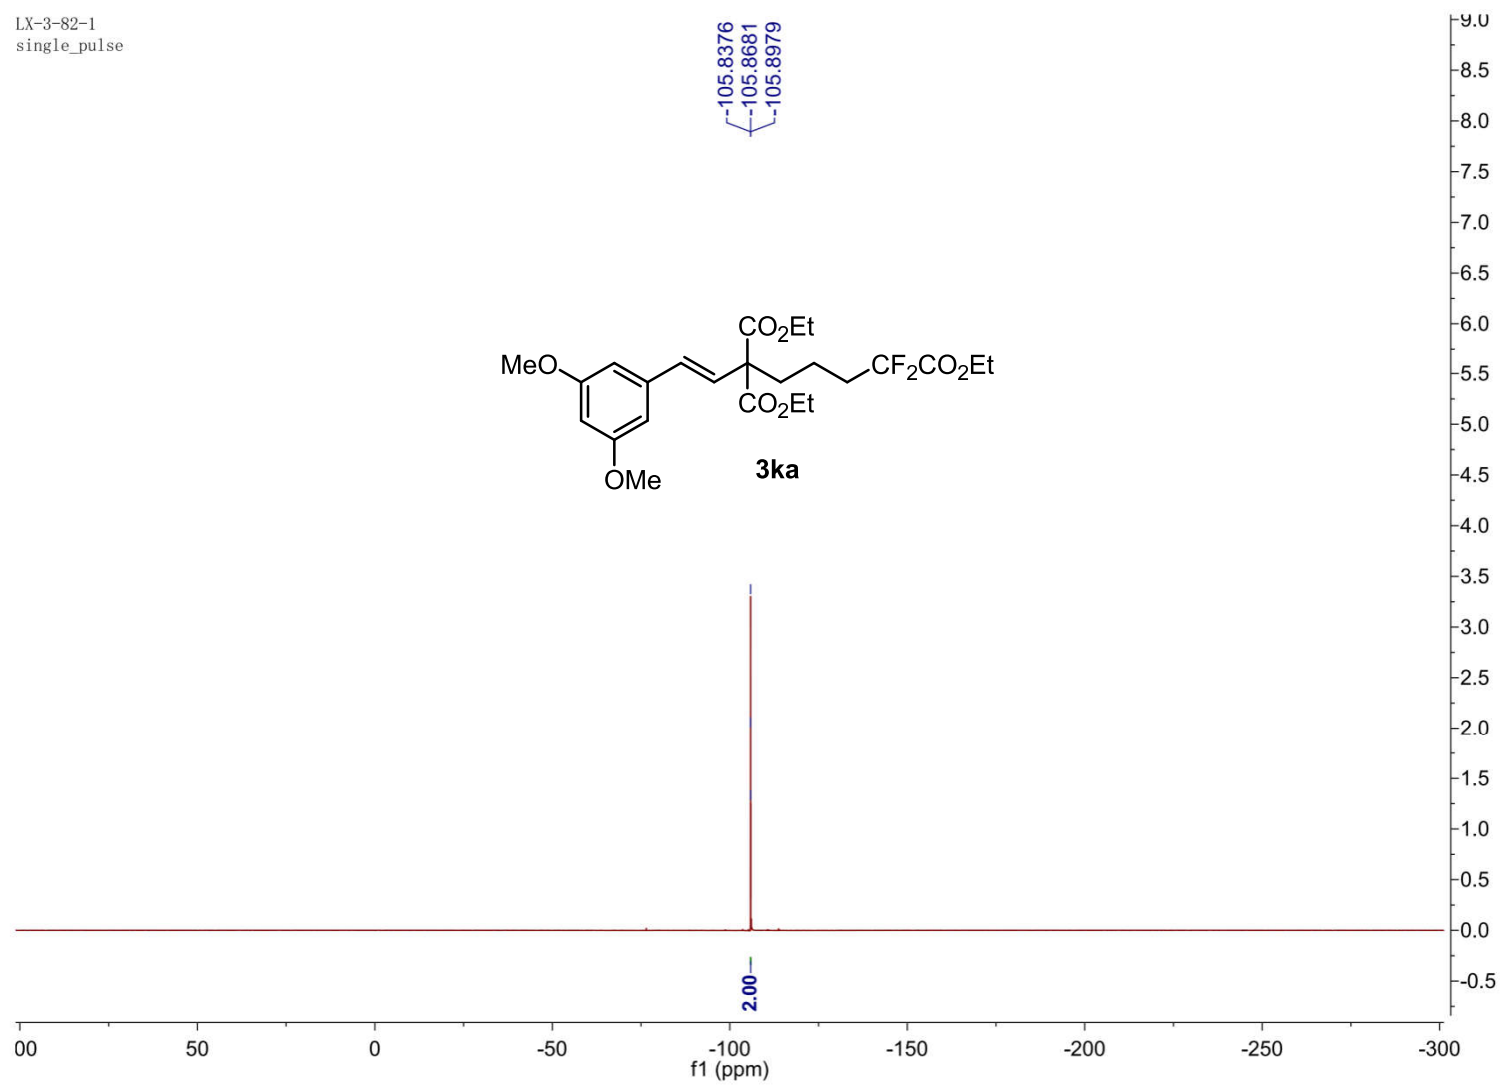

LX-3-82-1  
single pulse decoupled gated NOE

170.3082  
164.2862  
164.0690  
163.8528  
149.0634  
148.9638  
131.2933  
129.3400  
123.4504  
119.8990  
117.5269  
115.8684  
114.2110  
110.8940  
108.5995  
77.2123  
76.9999  
76.7878  
62.7761  
61.6682  
59.0849  
55.8753  
55.8287  
34.9596  
34.6207  
34.4677  
34.3134  
16.6120  
13.9760  
13.8527

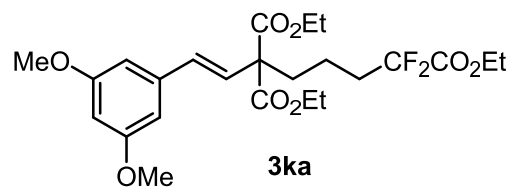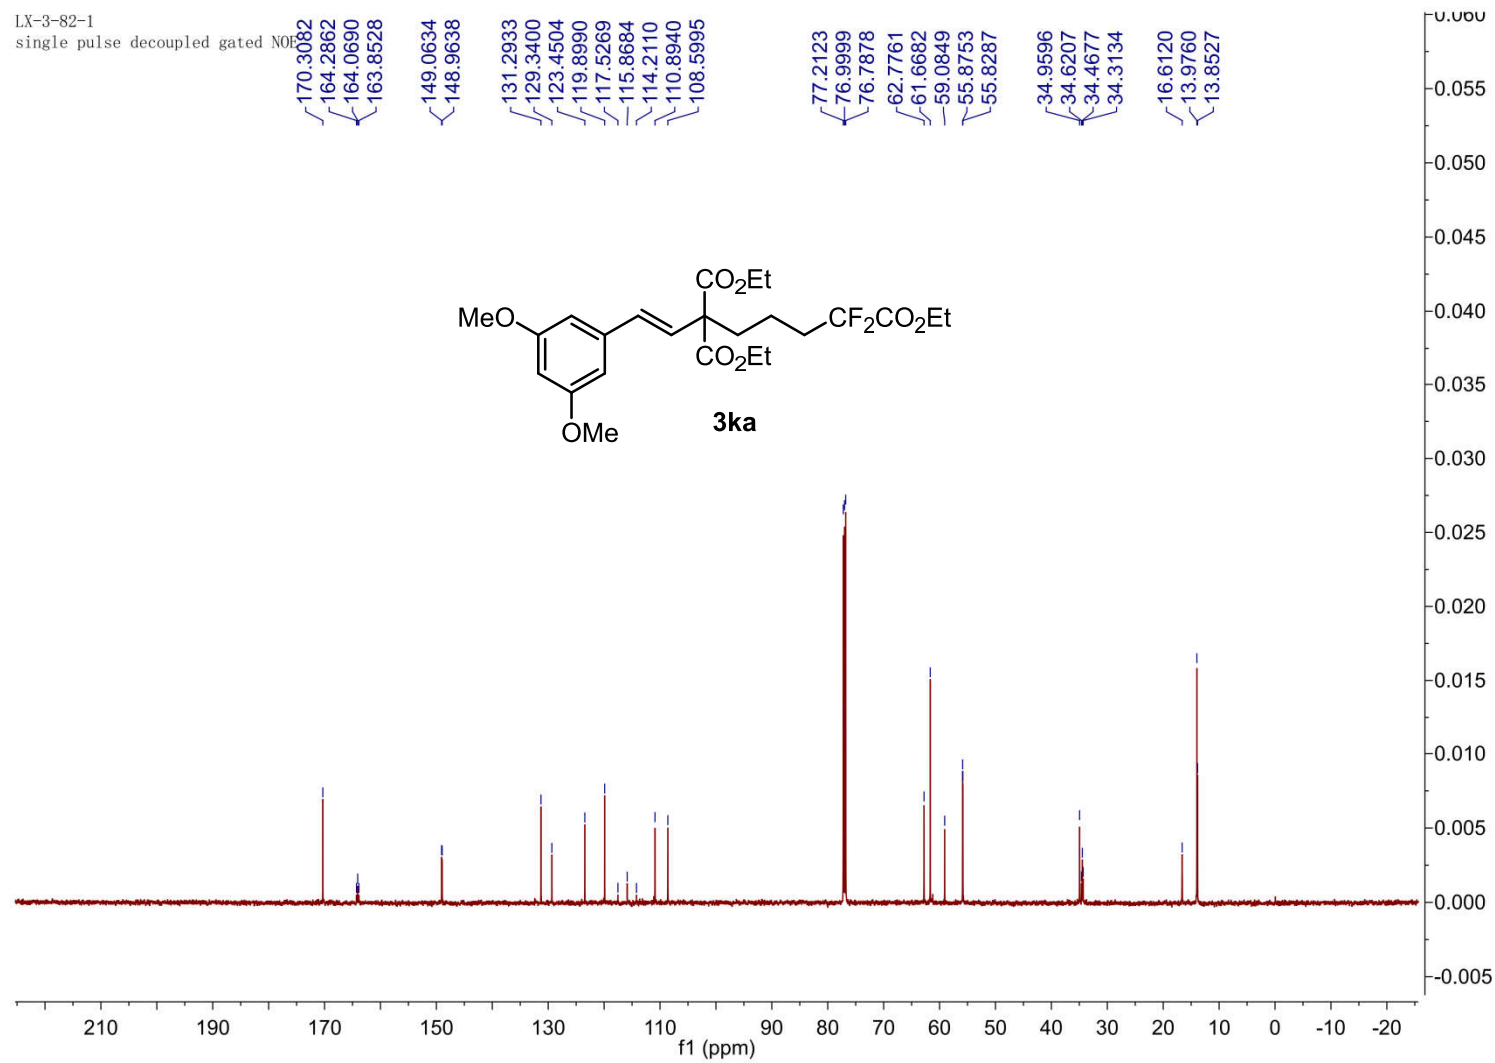

LX-3-84-2  
single\_pulse

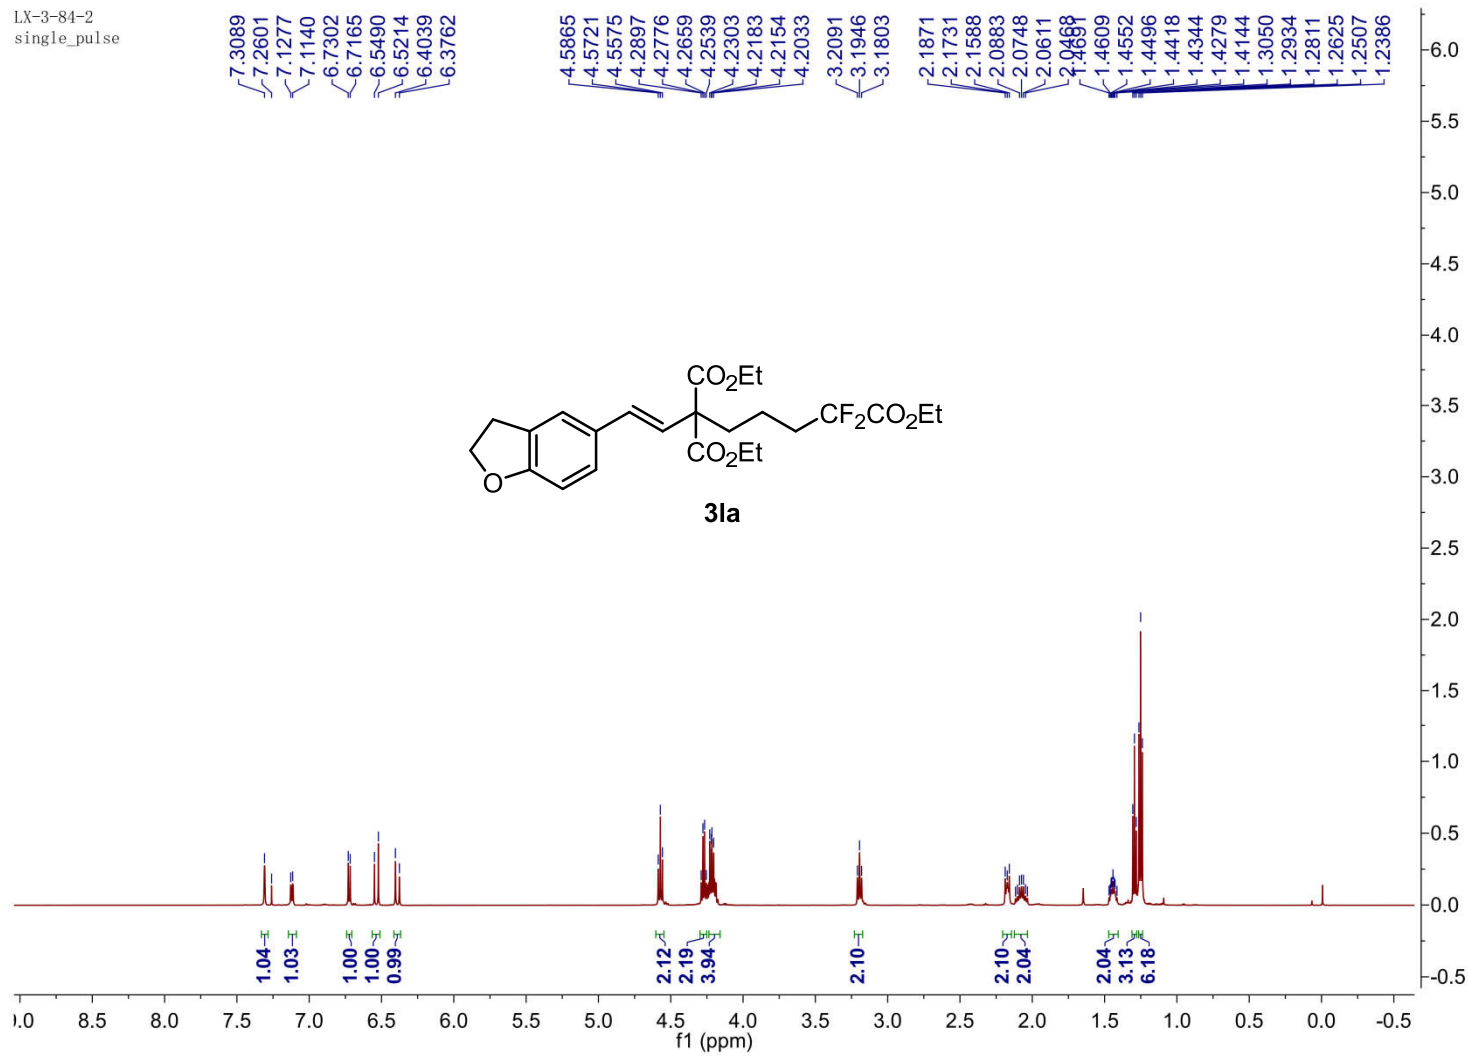

LX-3-84-2  
single\_pulse

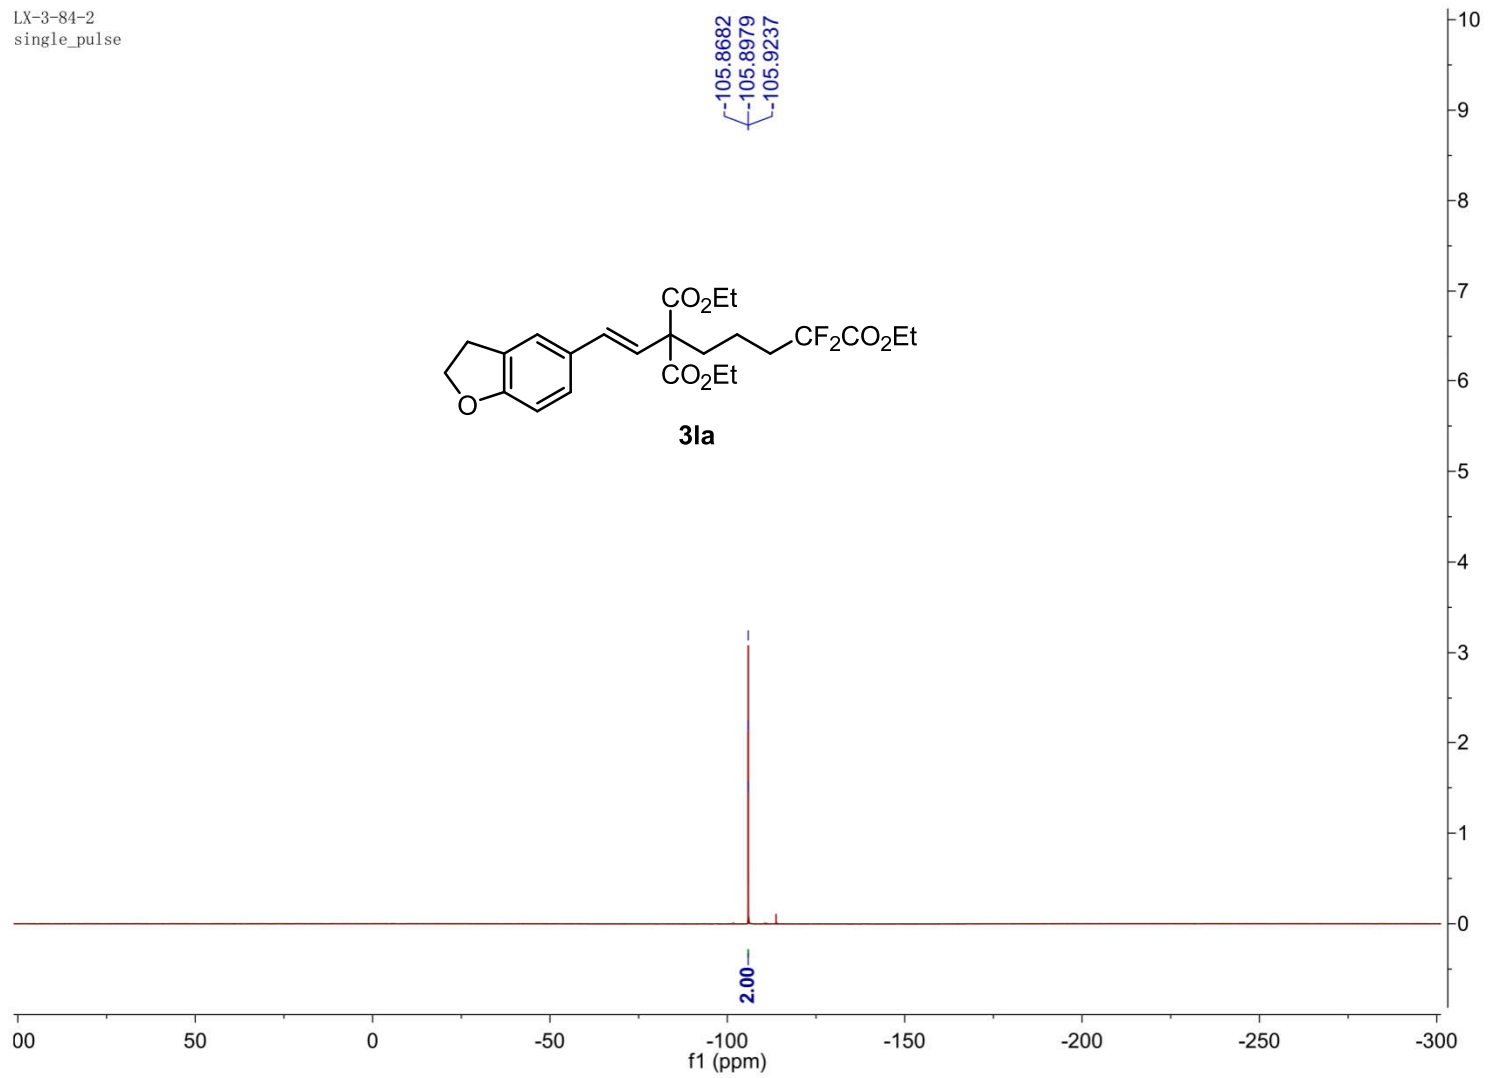

LX-3-84-2  
single pulse decoupled gate

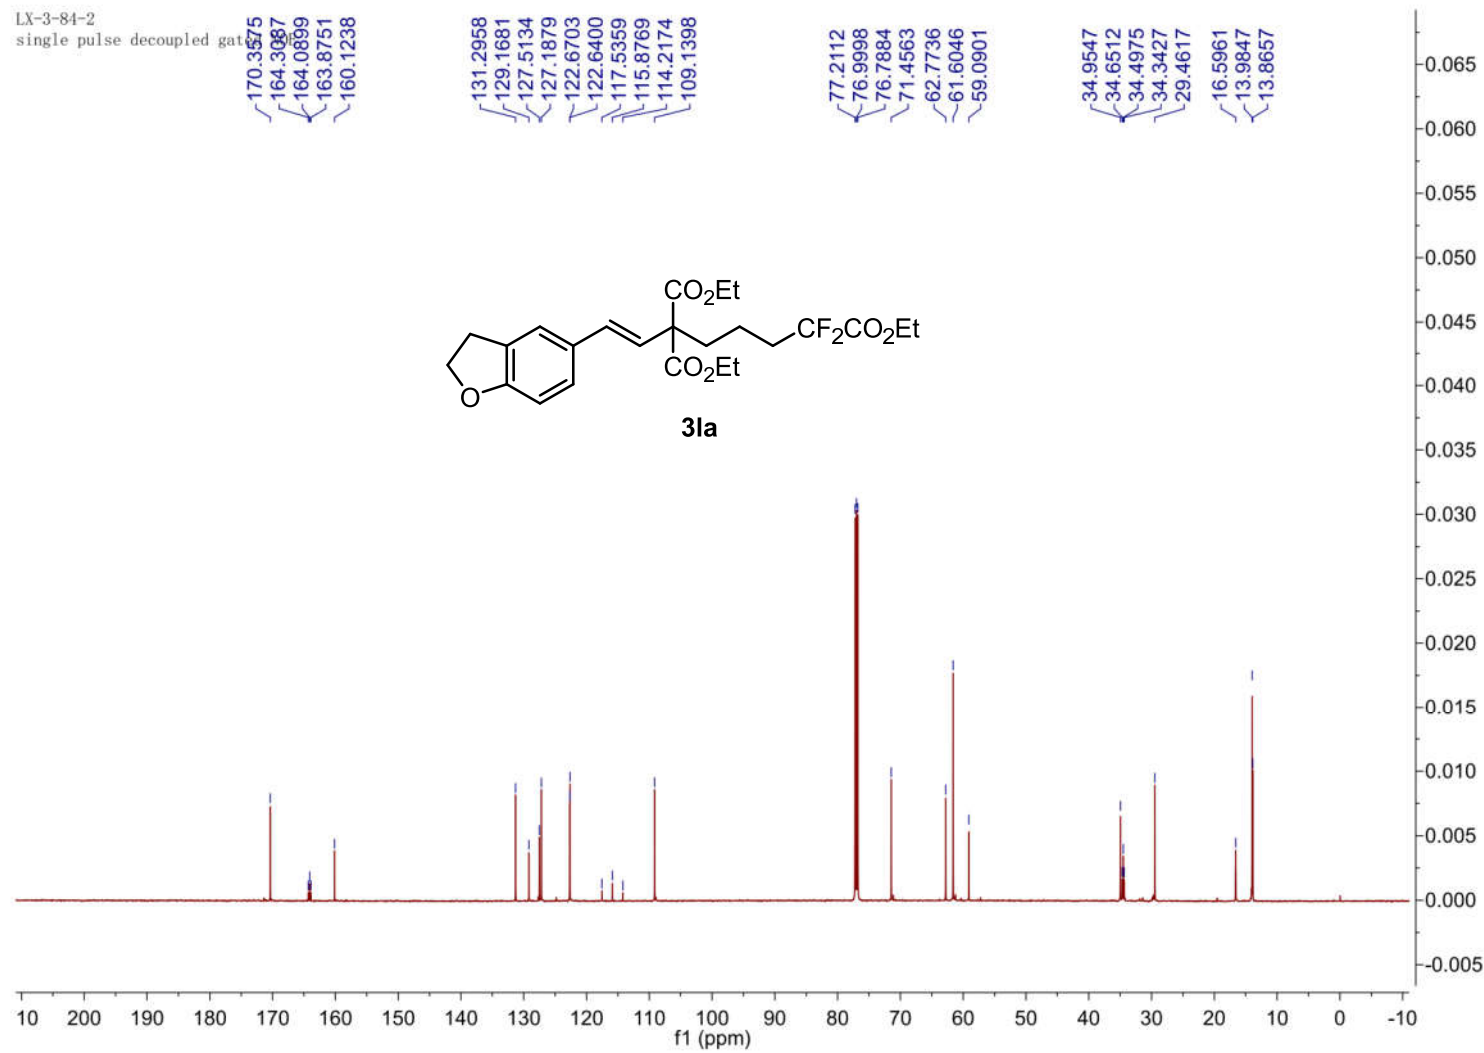

LX-3-113  
single\_pulse

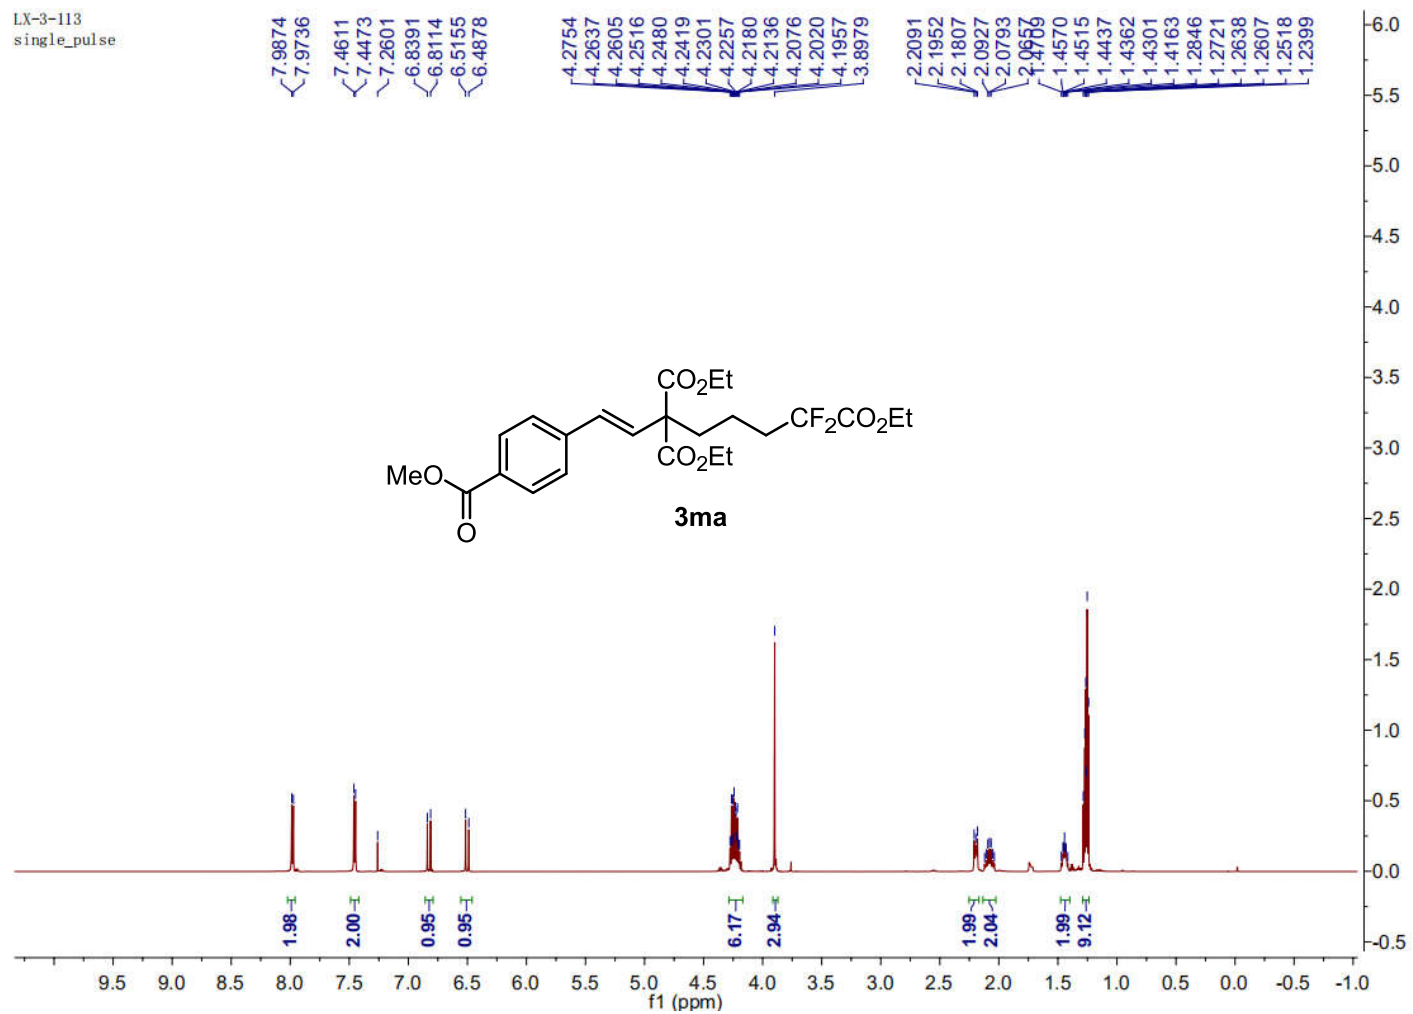

LX-3-113  
single\_pulse

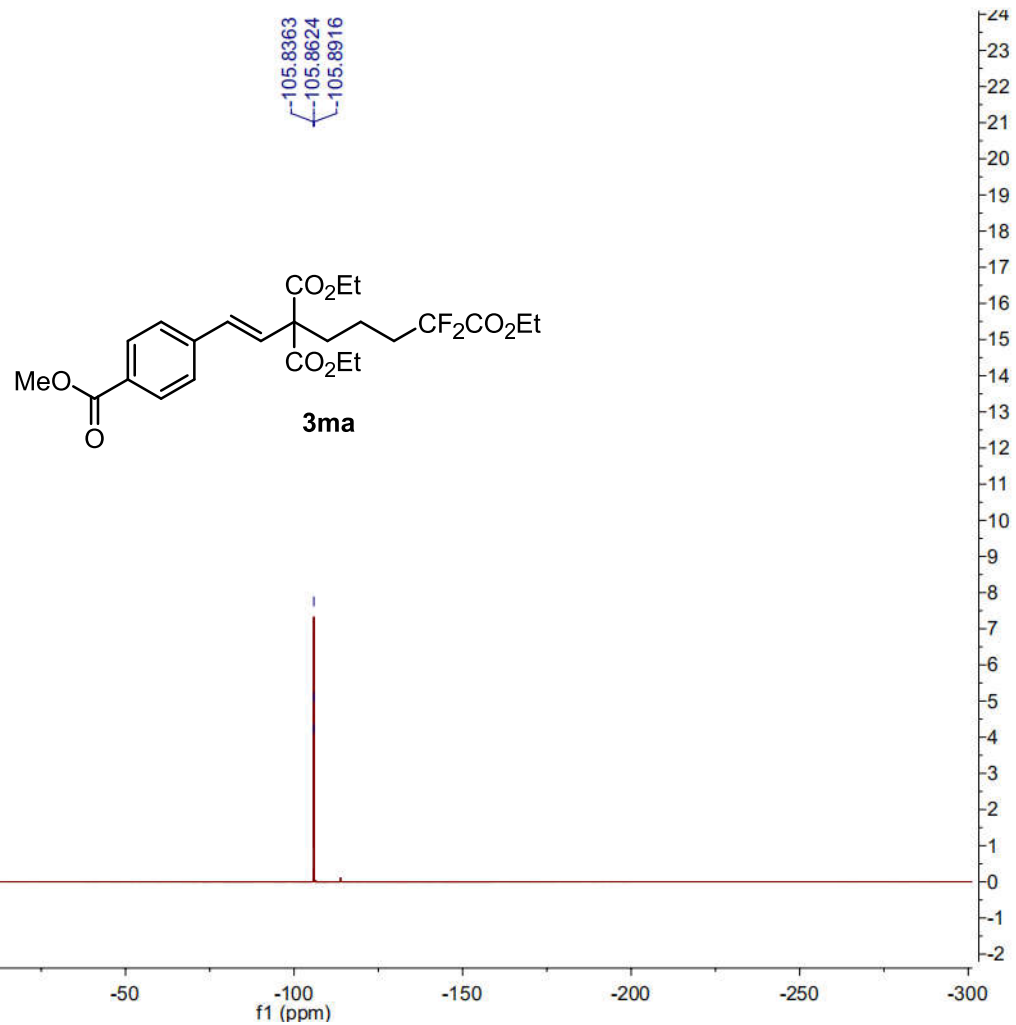

LX-3-113

single pulse decoupled gated N

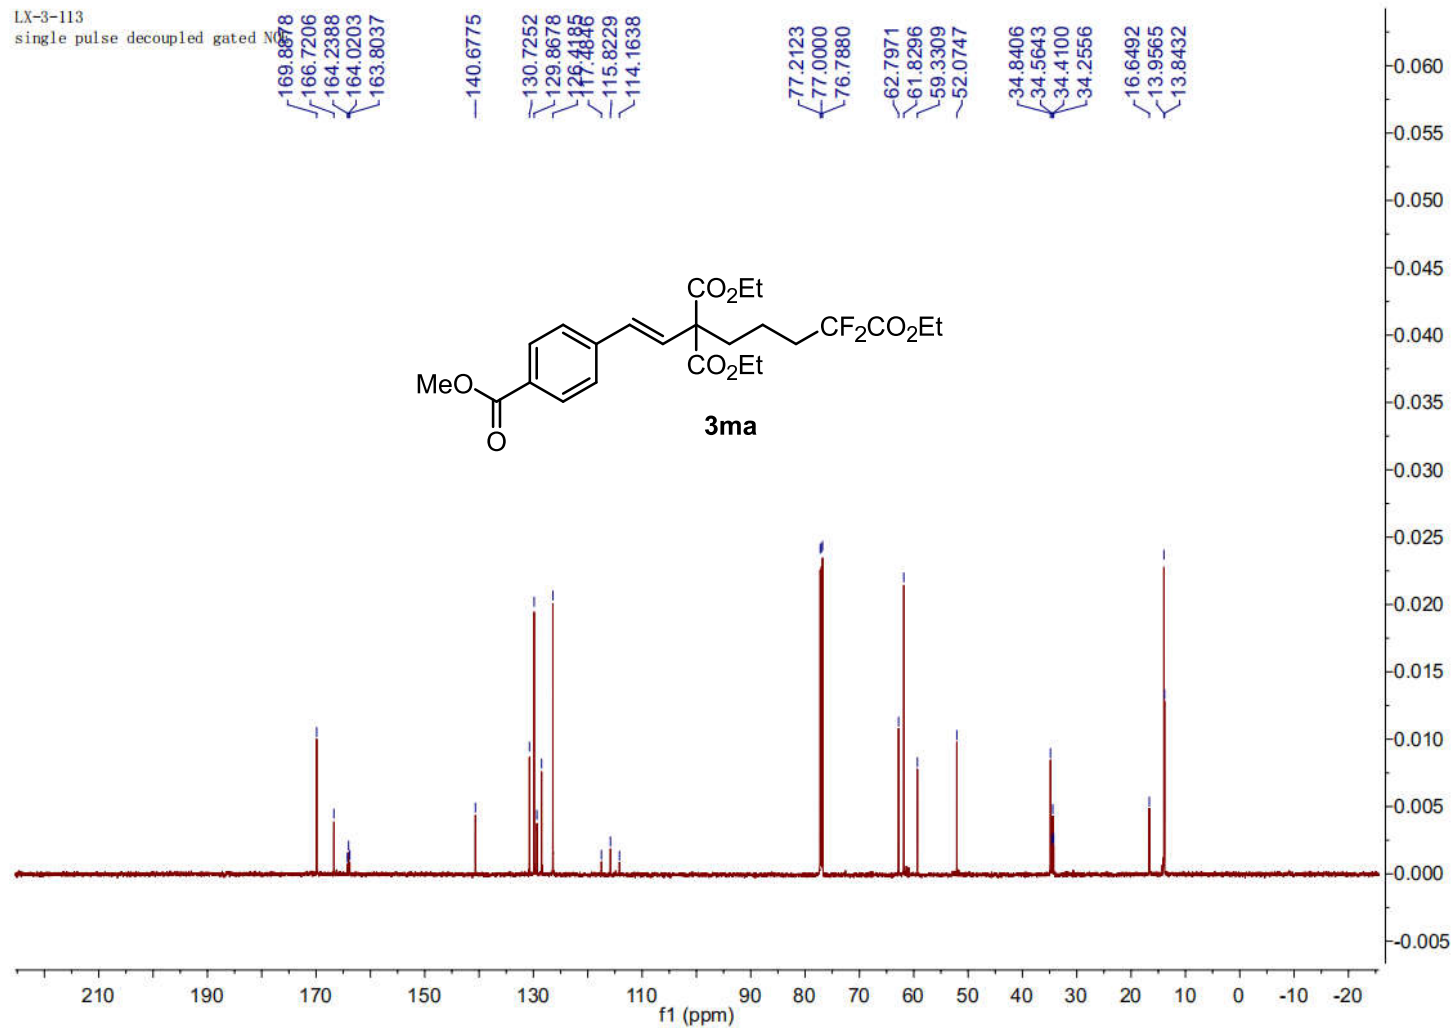



LX-3-81-1  
single\_pulse

7.4157  
7.4140  
7.4018  
7.3396  
7.3275  
7.3143  
7.2737  
7.2643  
7.2602  
7.2488  
6.7131  
6.6854  
6.4773  
6.4495

4.2921  
4.2789  
4.2682  
4.2564  
3.7659

2.2193  
2.2052  
2.1909  
2.1140  
2.0996  
2.0862  
2.0725  
2.0583  
2.0449  
1.4744  
1.4664  
1.4607  
1.4548  
1.4470  
1.4395  
1.4328  
1.4279  
1.4198  
1.3015  
1.2893  
1.2775

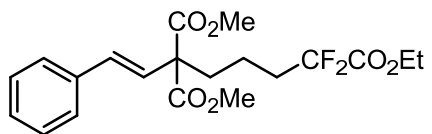

3na

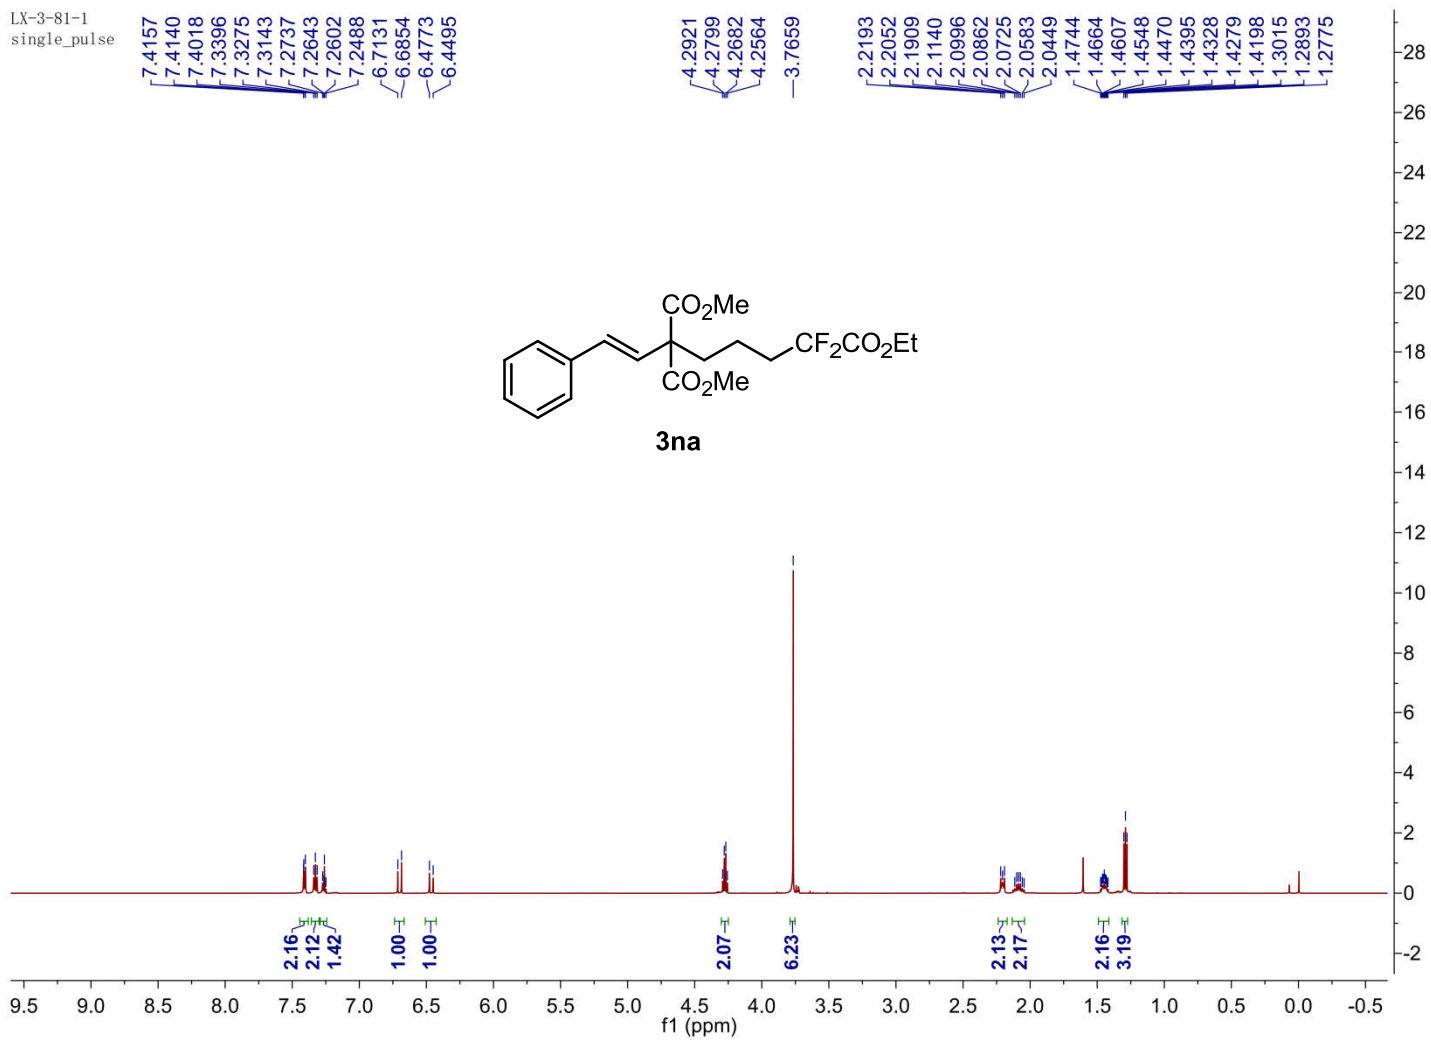

LX-3-81-1  
single\_pulse

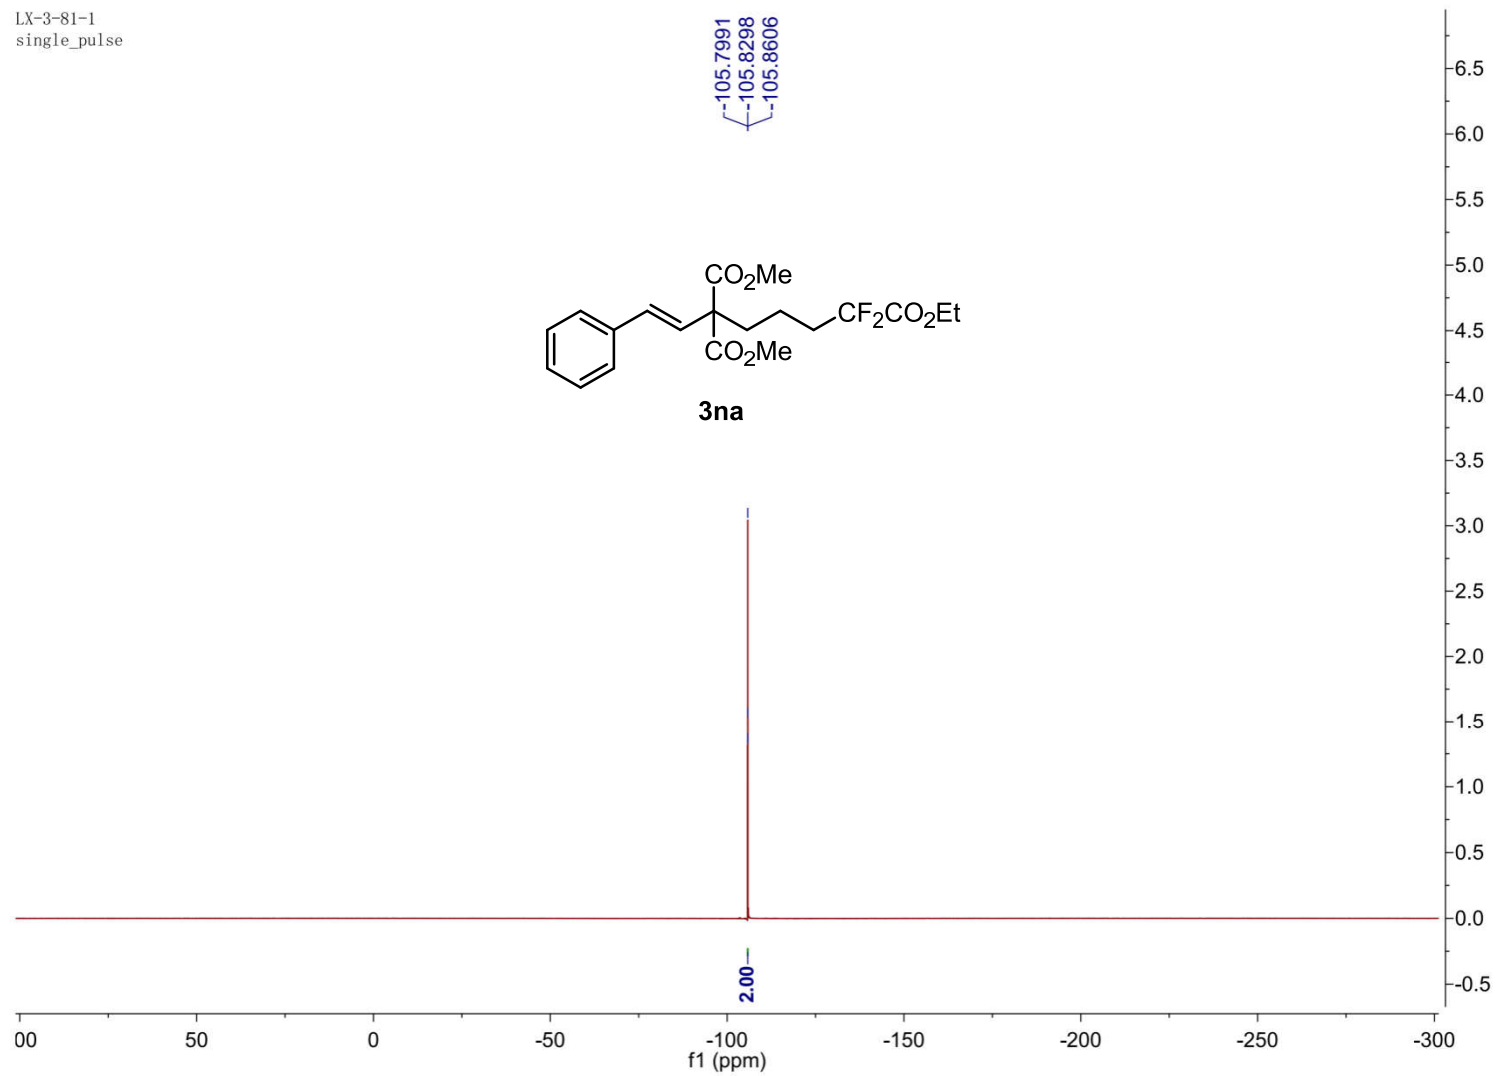

LX-3-81-1

single pulse decoupled gated NOE

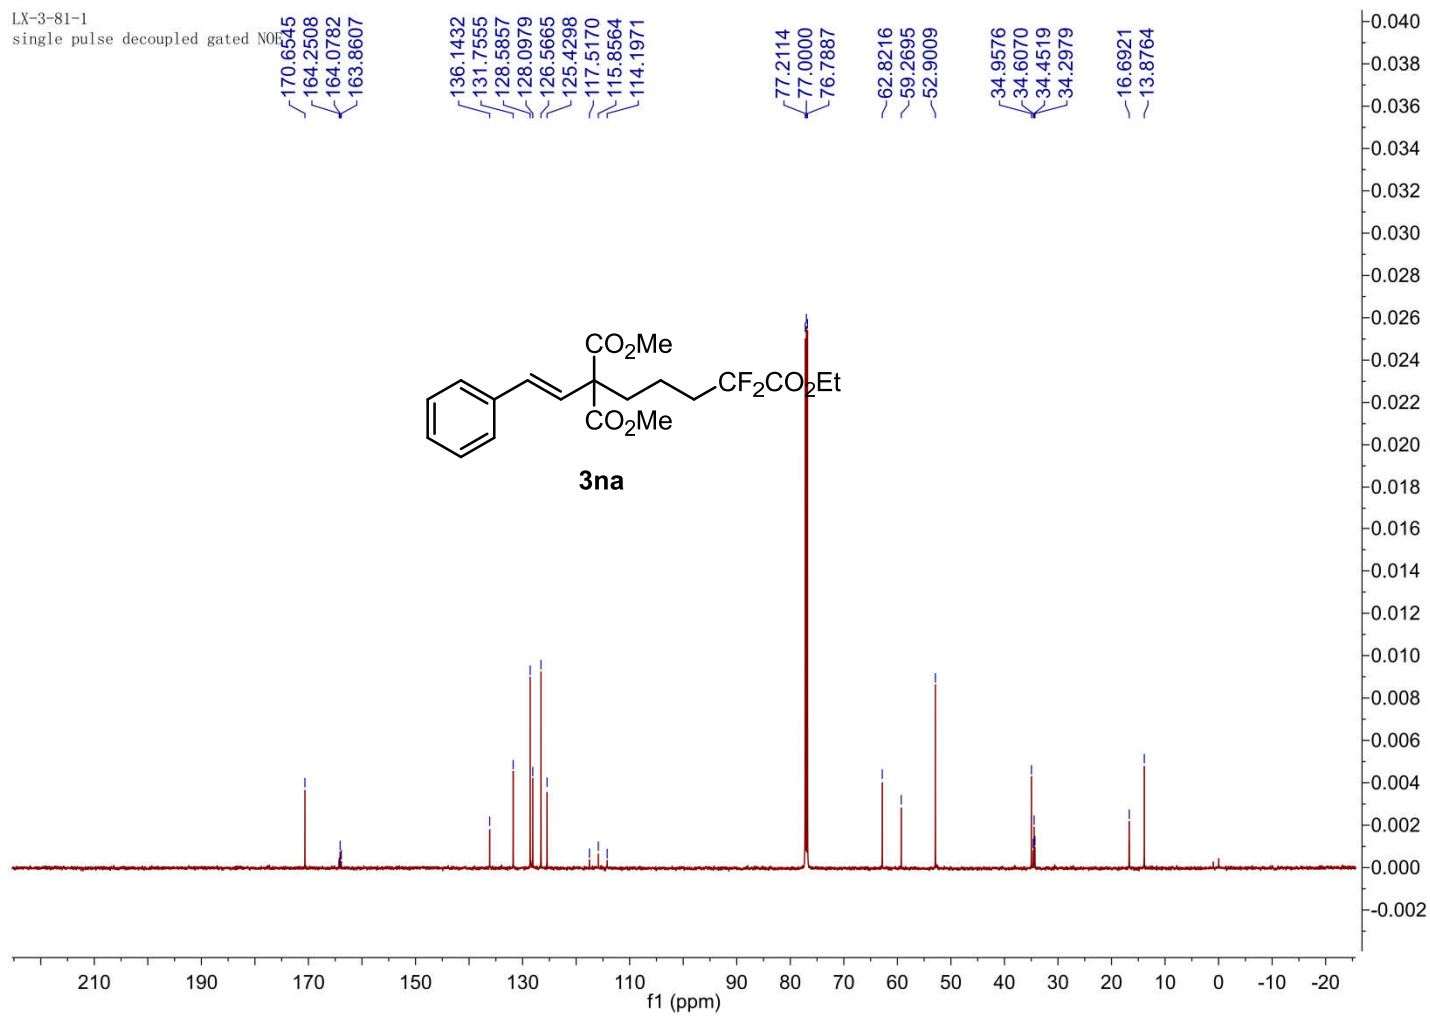

LX-3-82-3  
single\_pulse

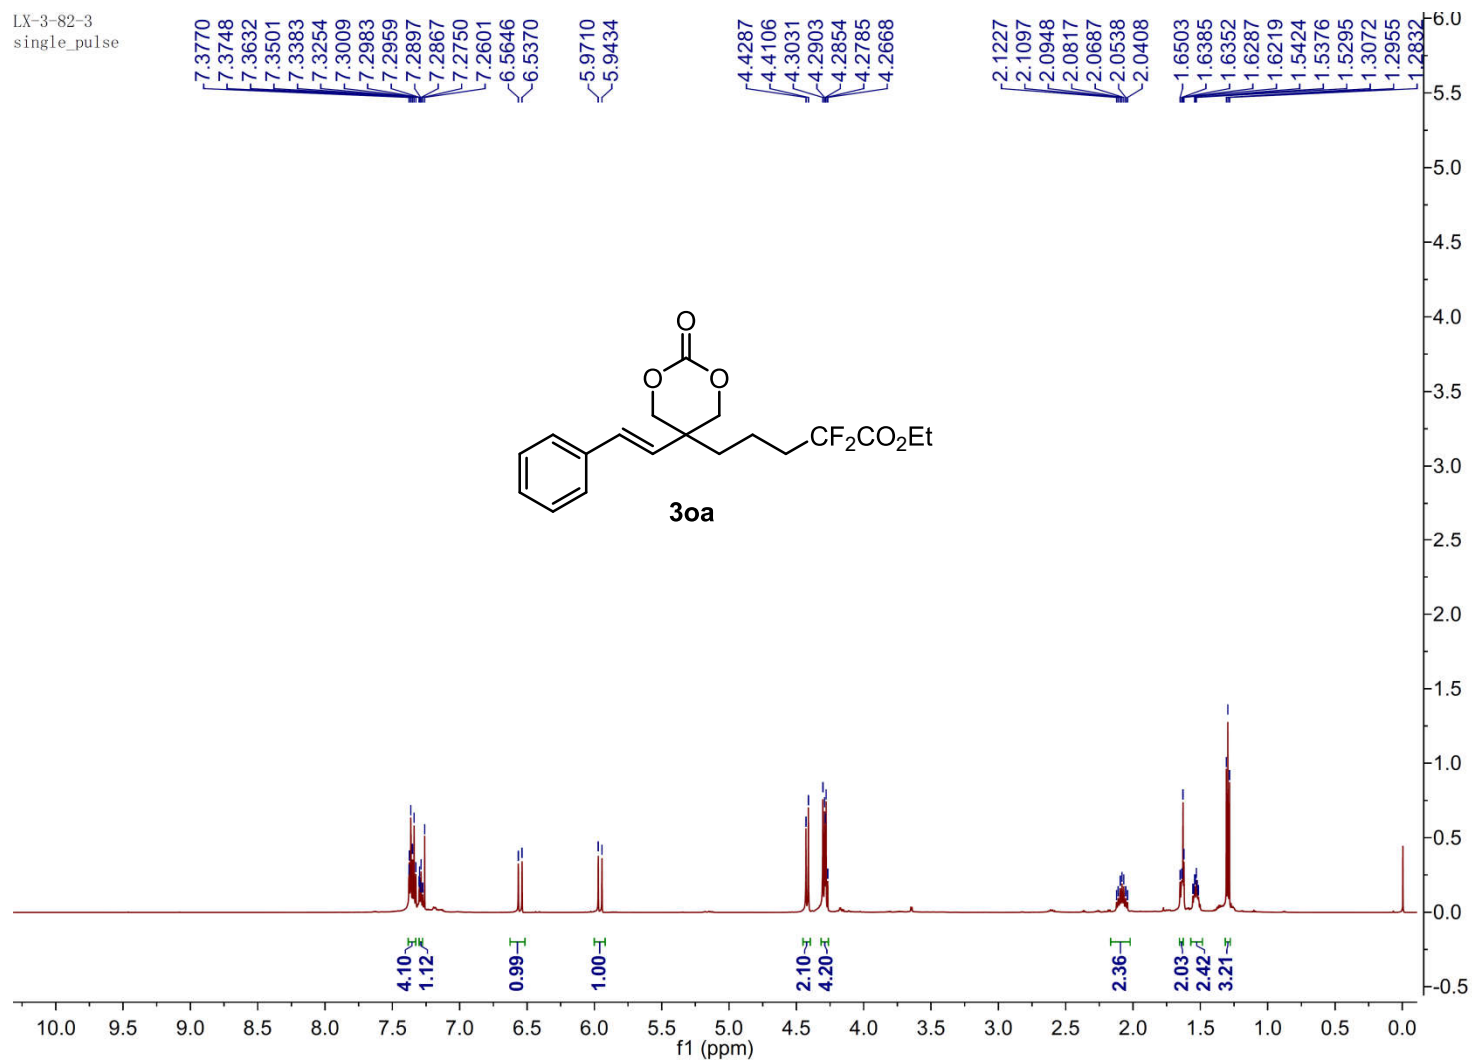

LX-3-82-3  
single\_pulse

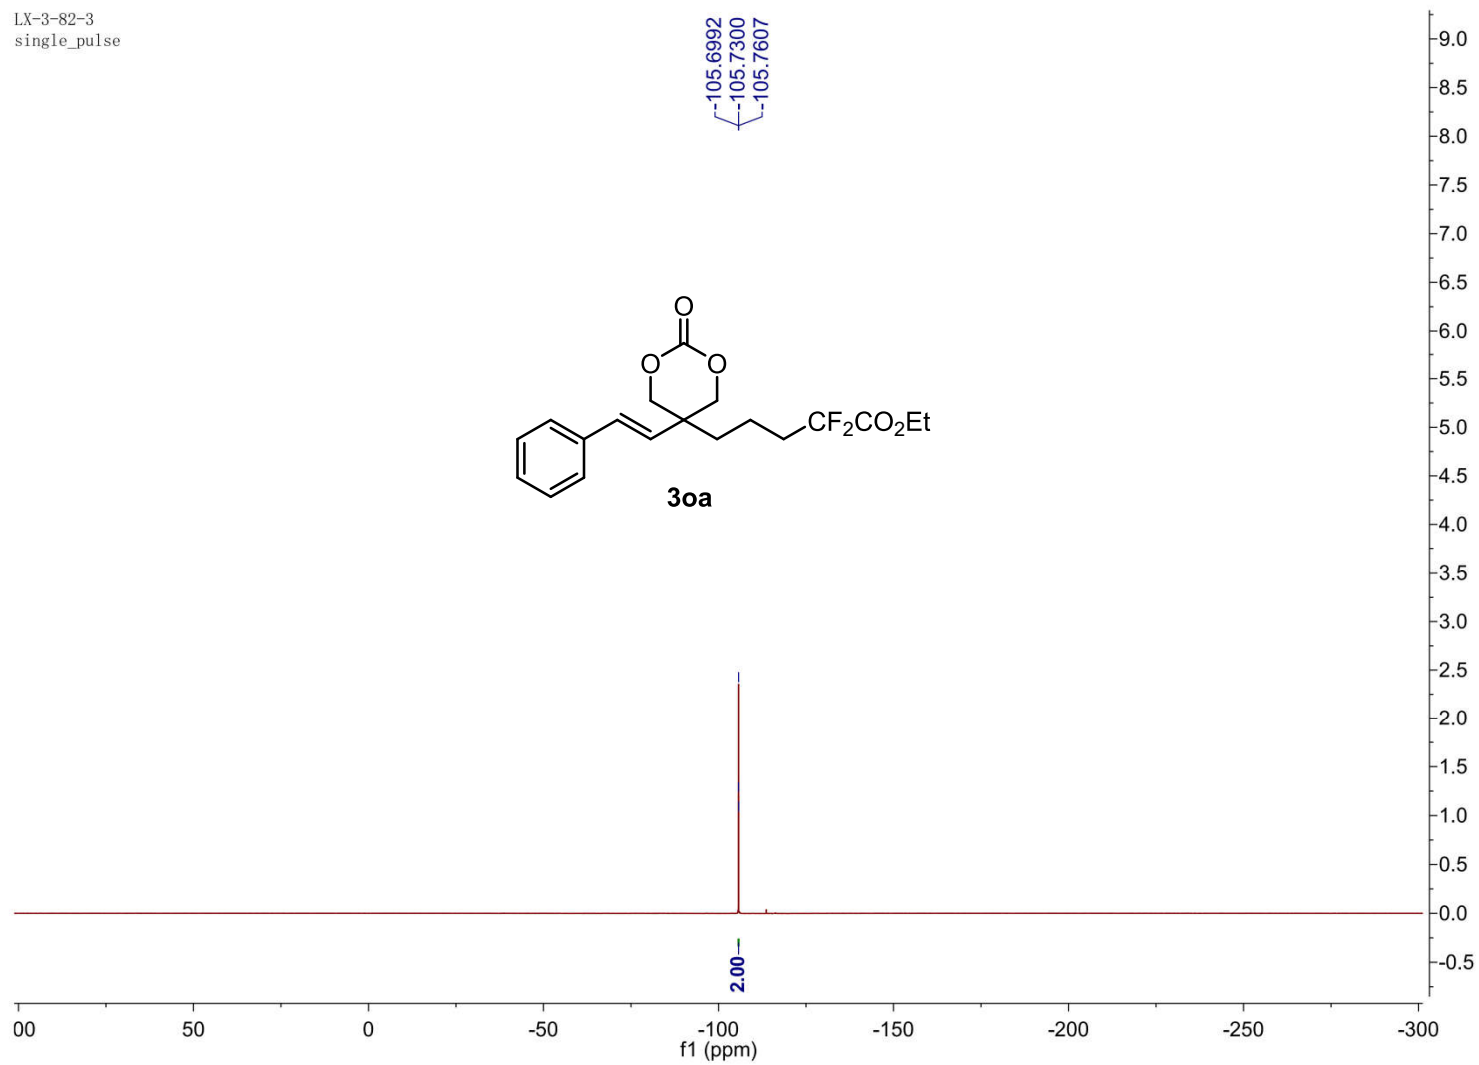

LX-3-82-3  
single pulse decoupled NOE

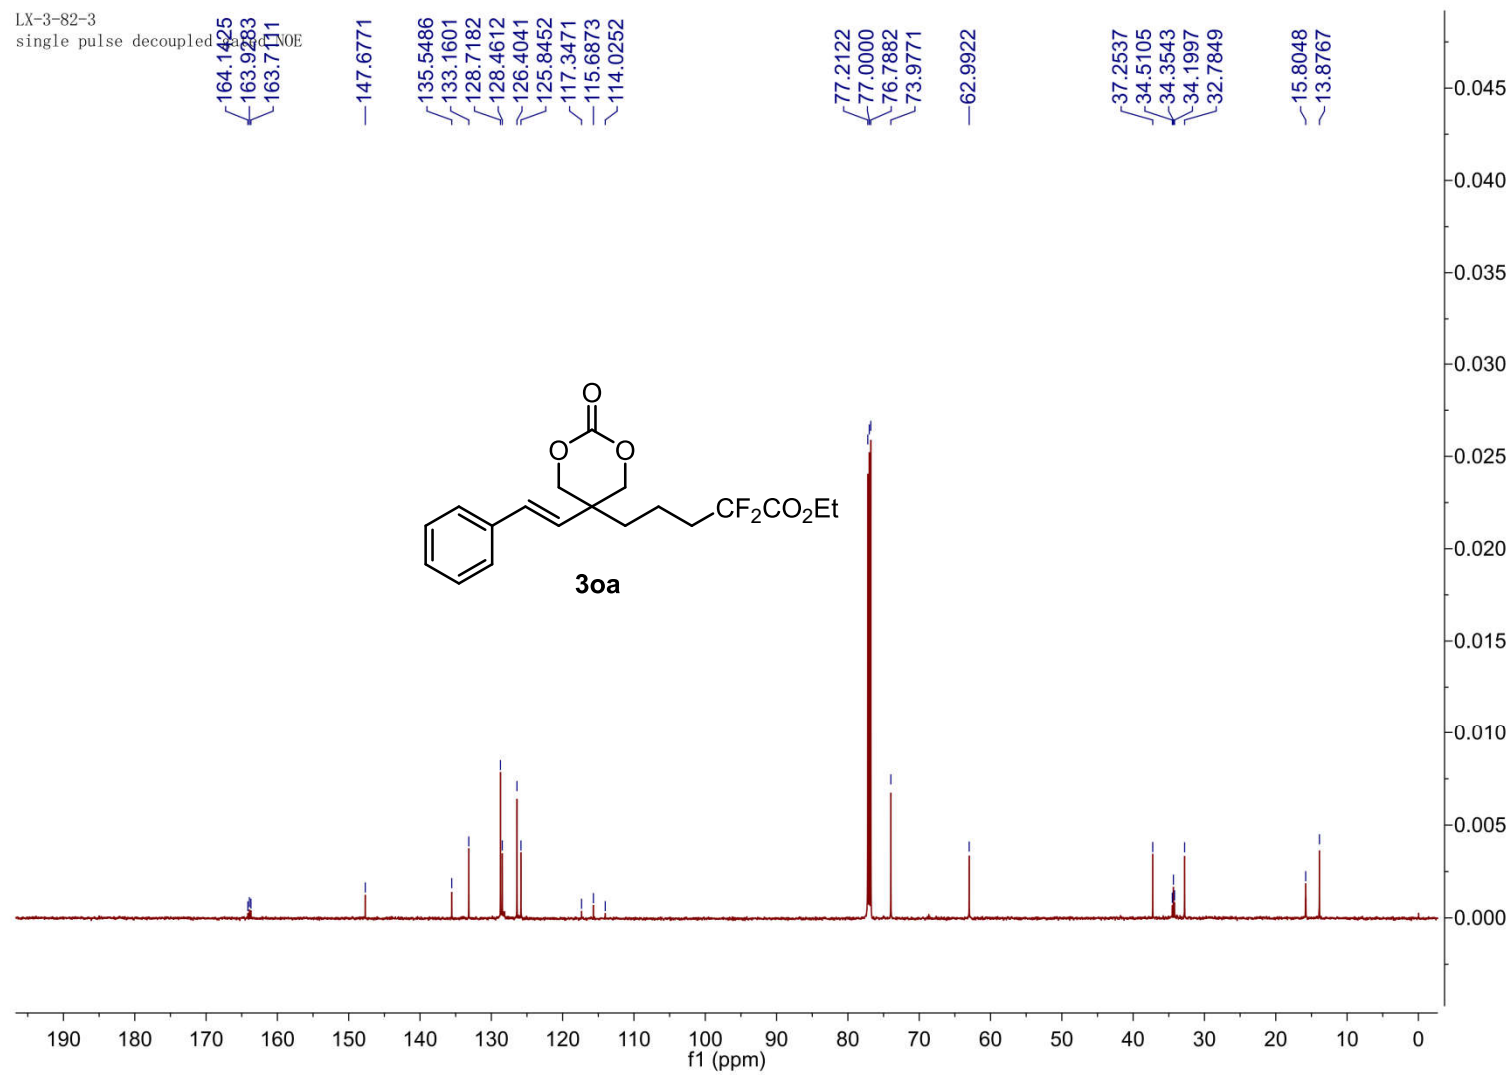

LX-3-82-5  
single\_pulse

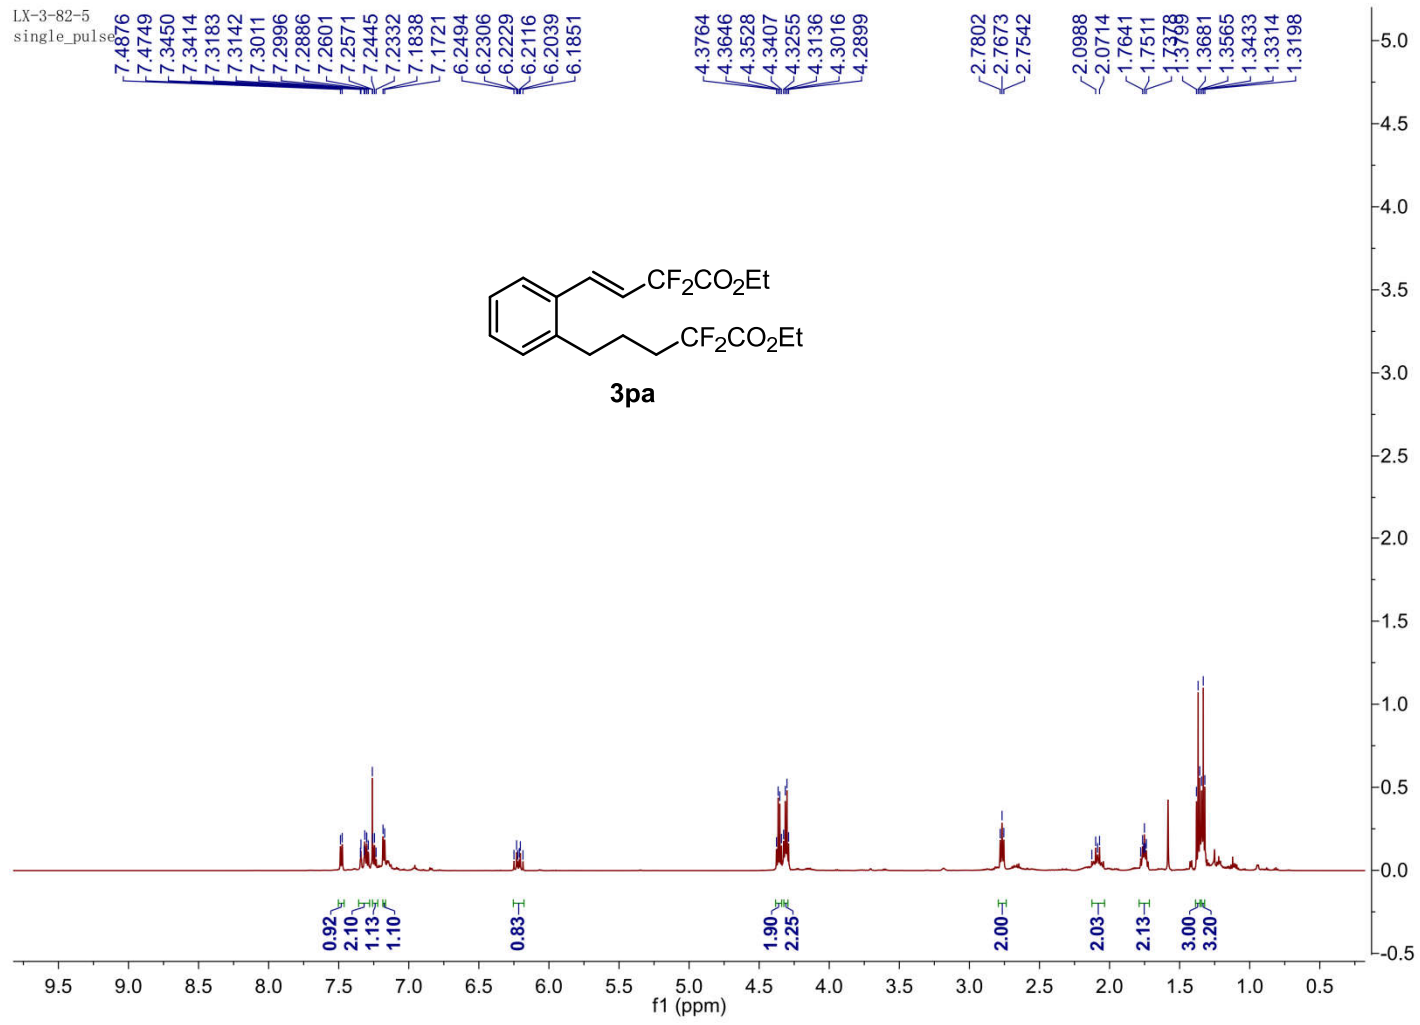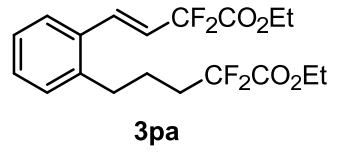

LX-3-82-2  
single\_pulse

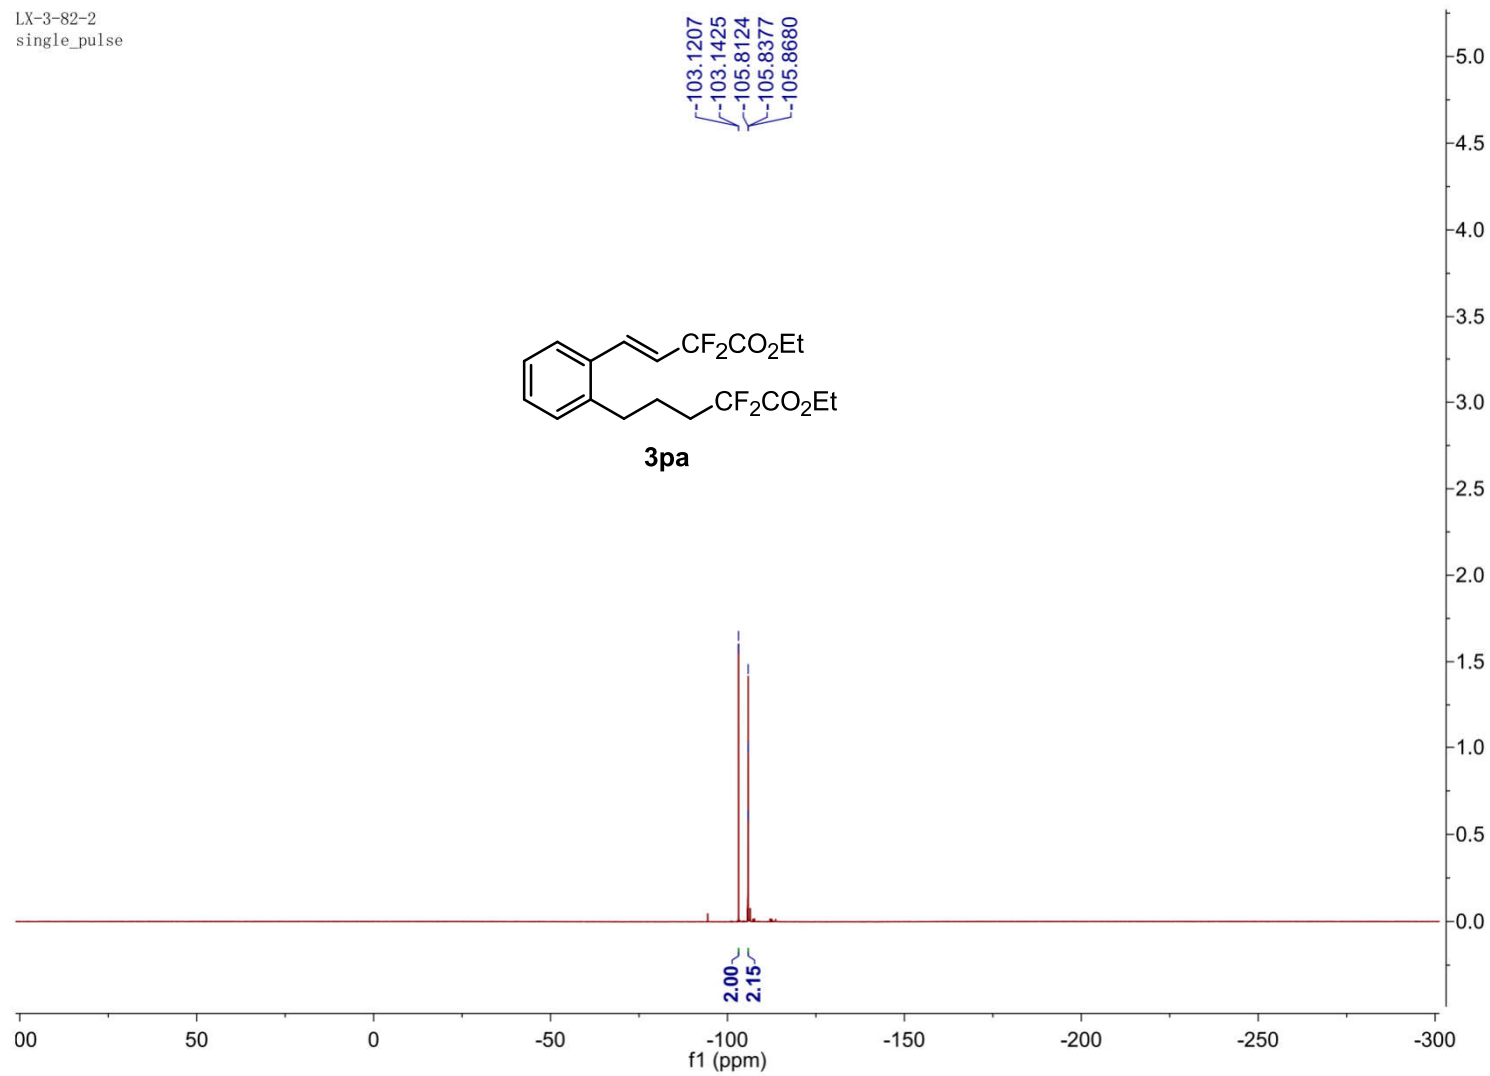



LX-3-82-5  
single pulse decoupled gated NO

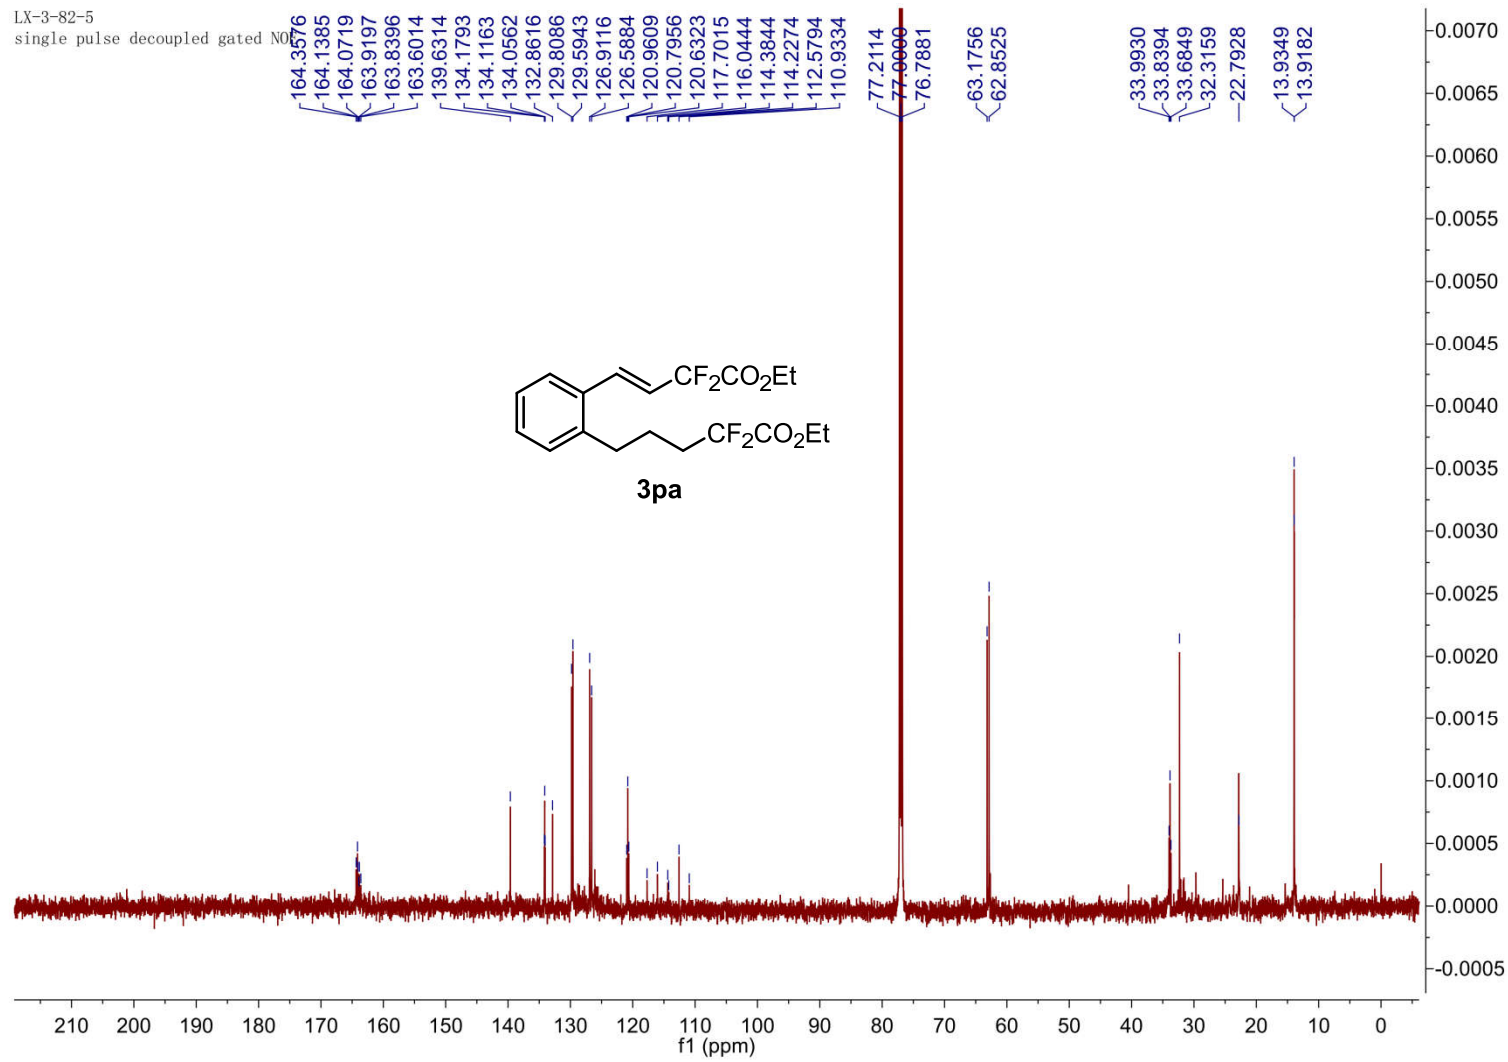

lx-3-87-1  
single\_pulse

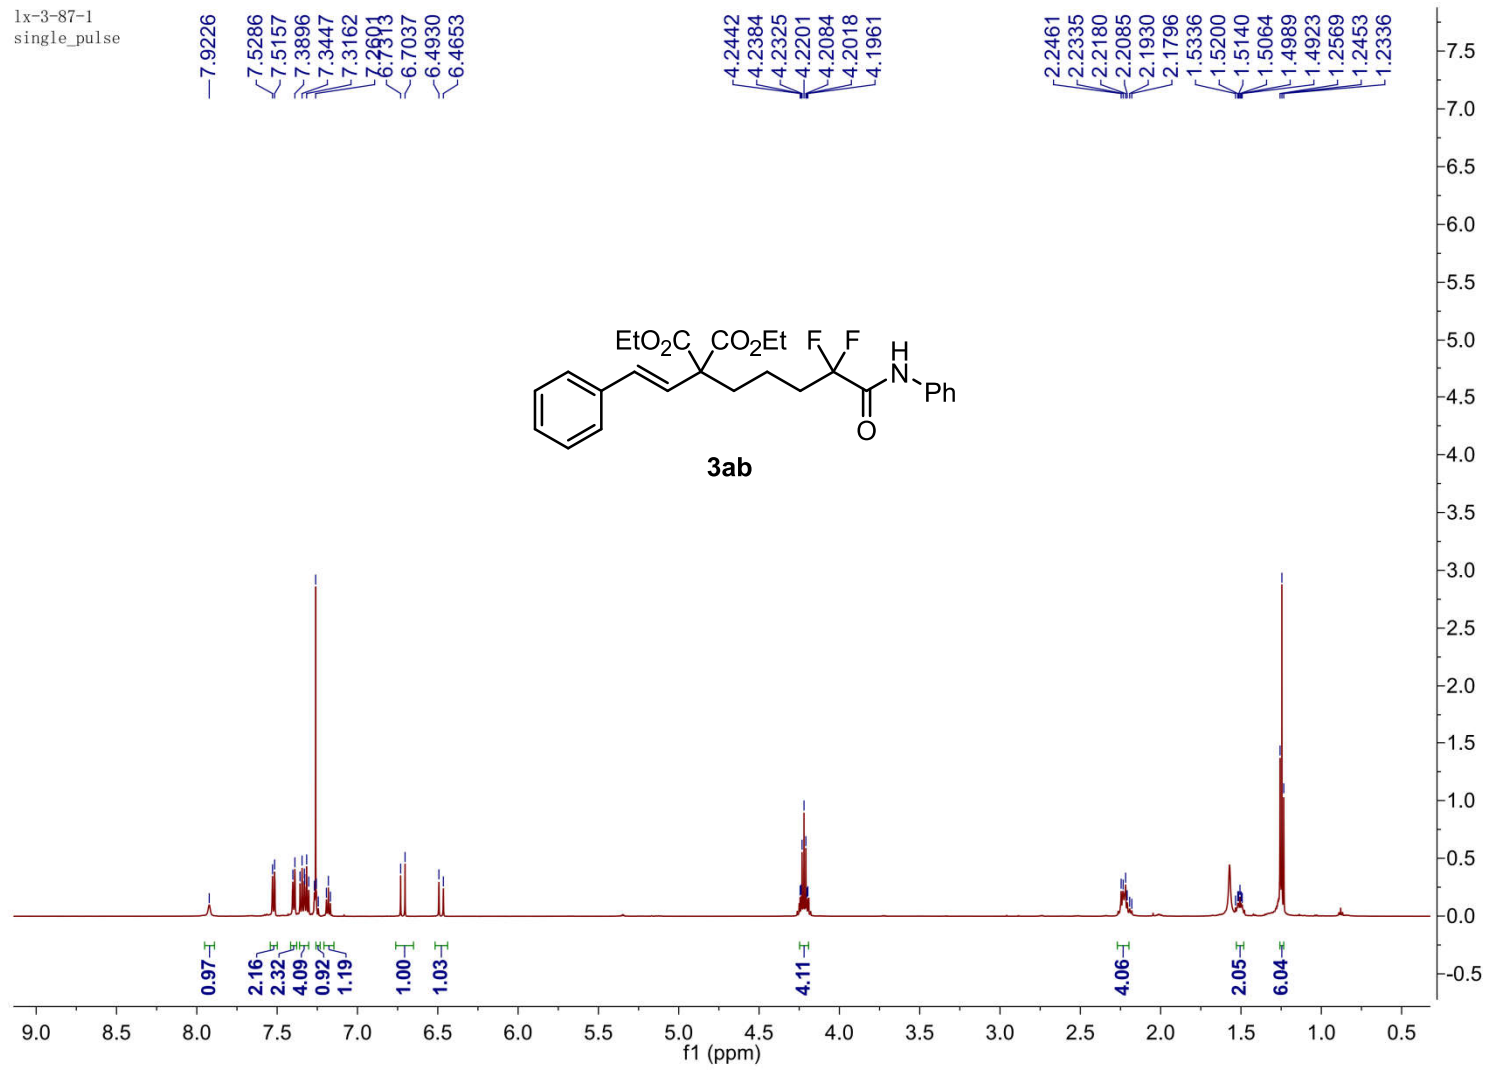

LX-3-87-1  
single\_pulse

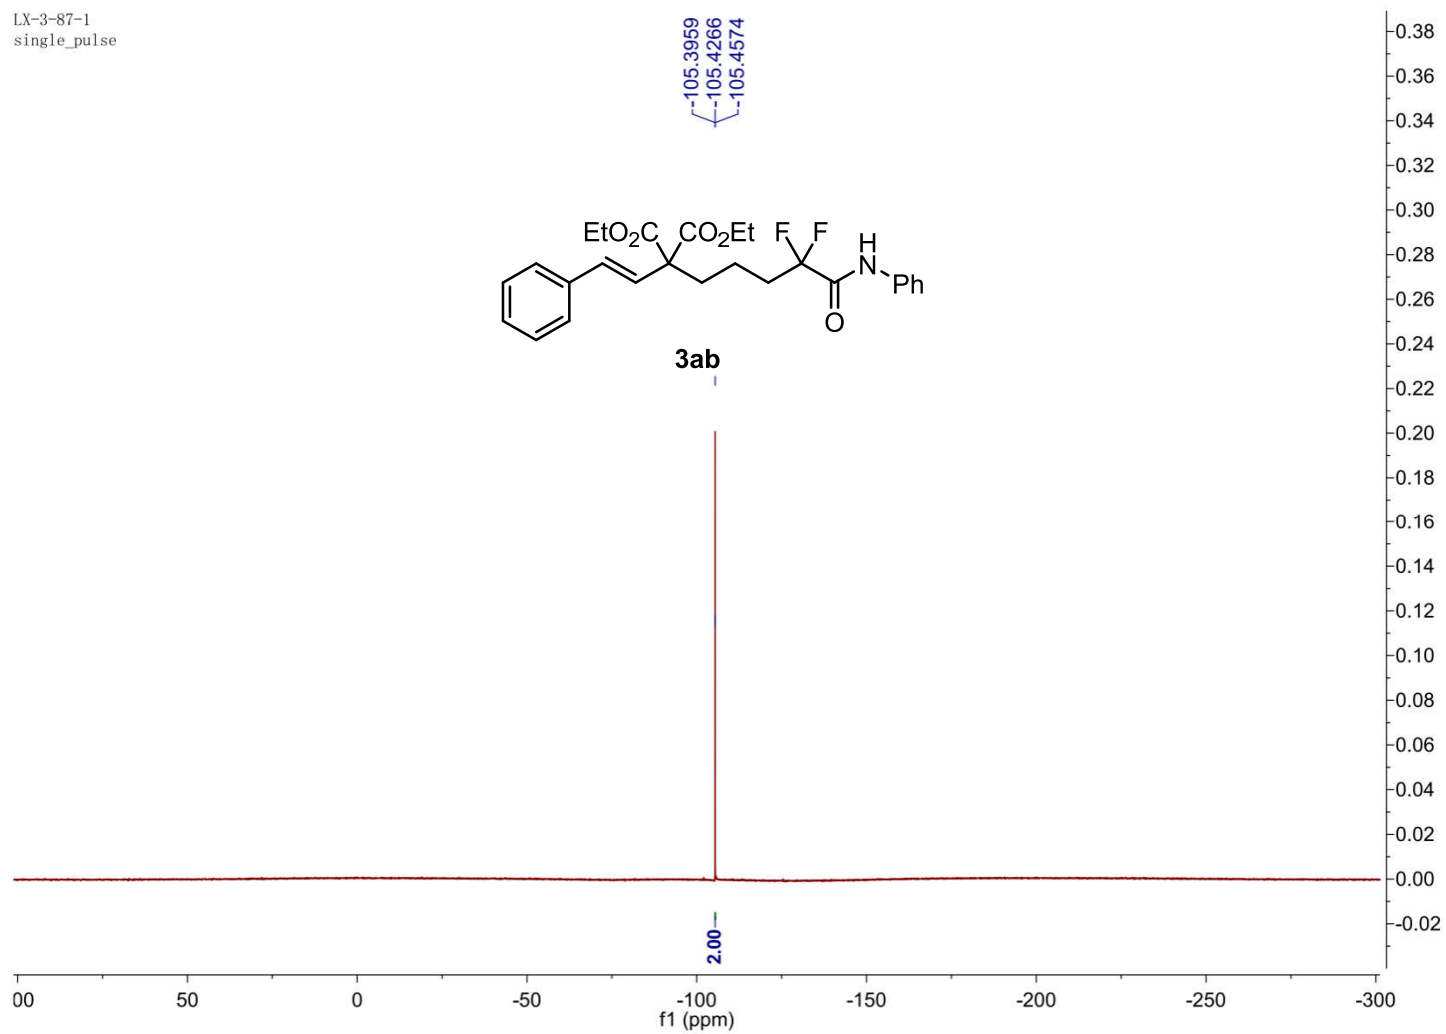

LX-3-87-1  
single pulse decoupled gated

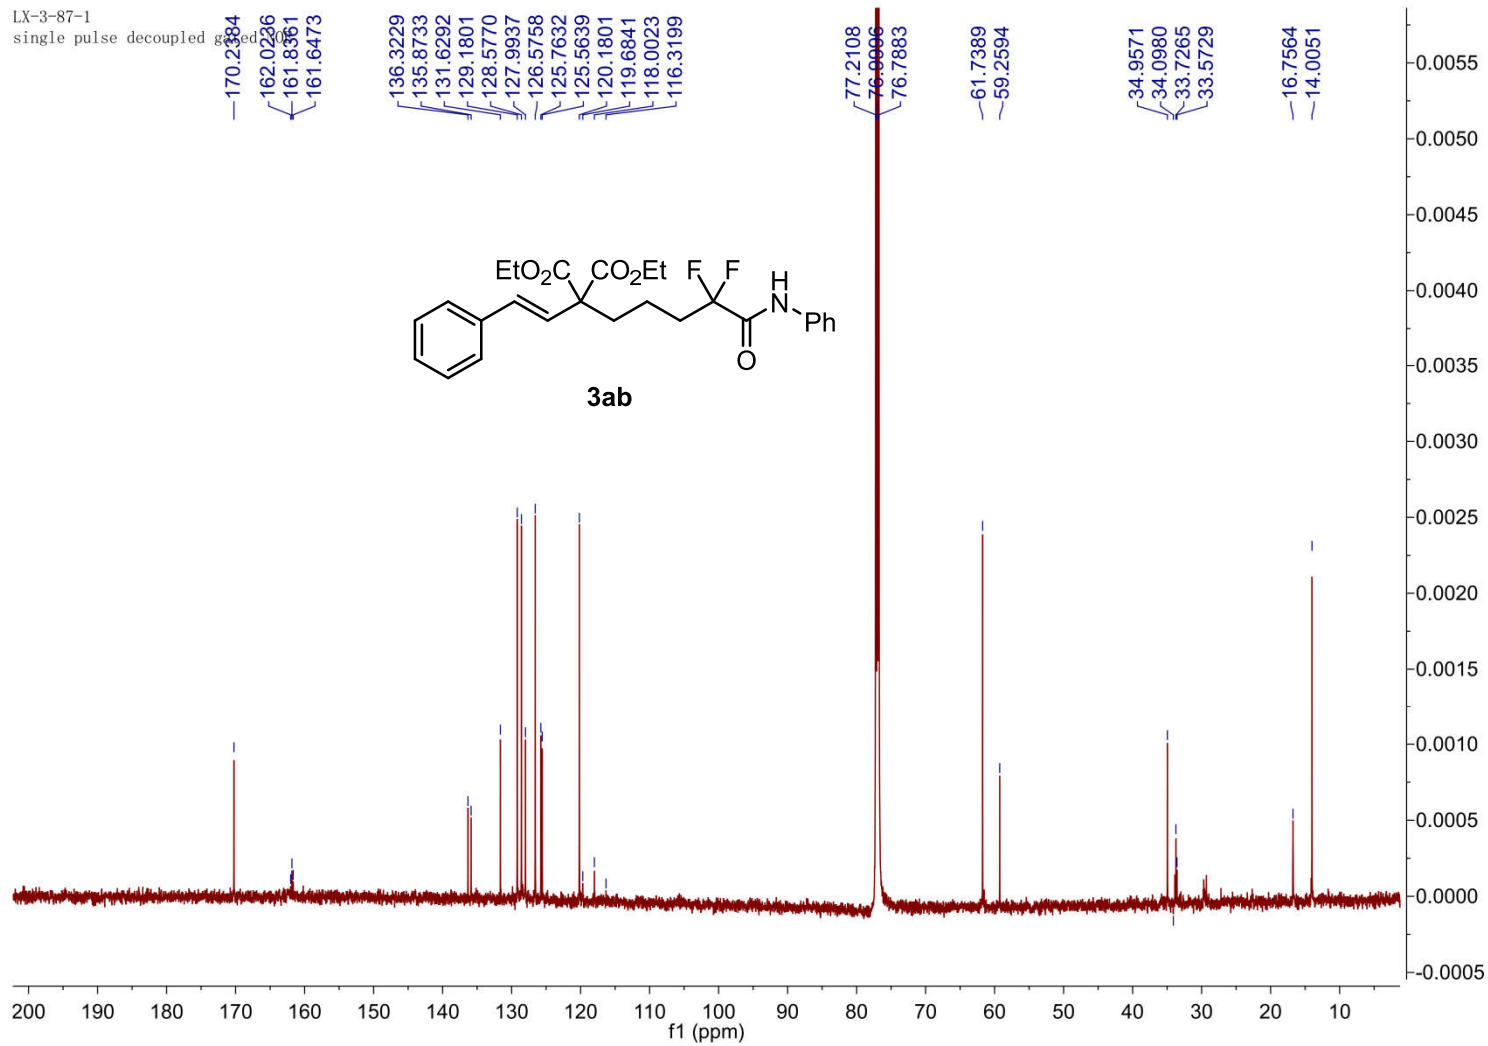

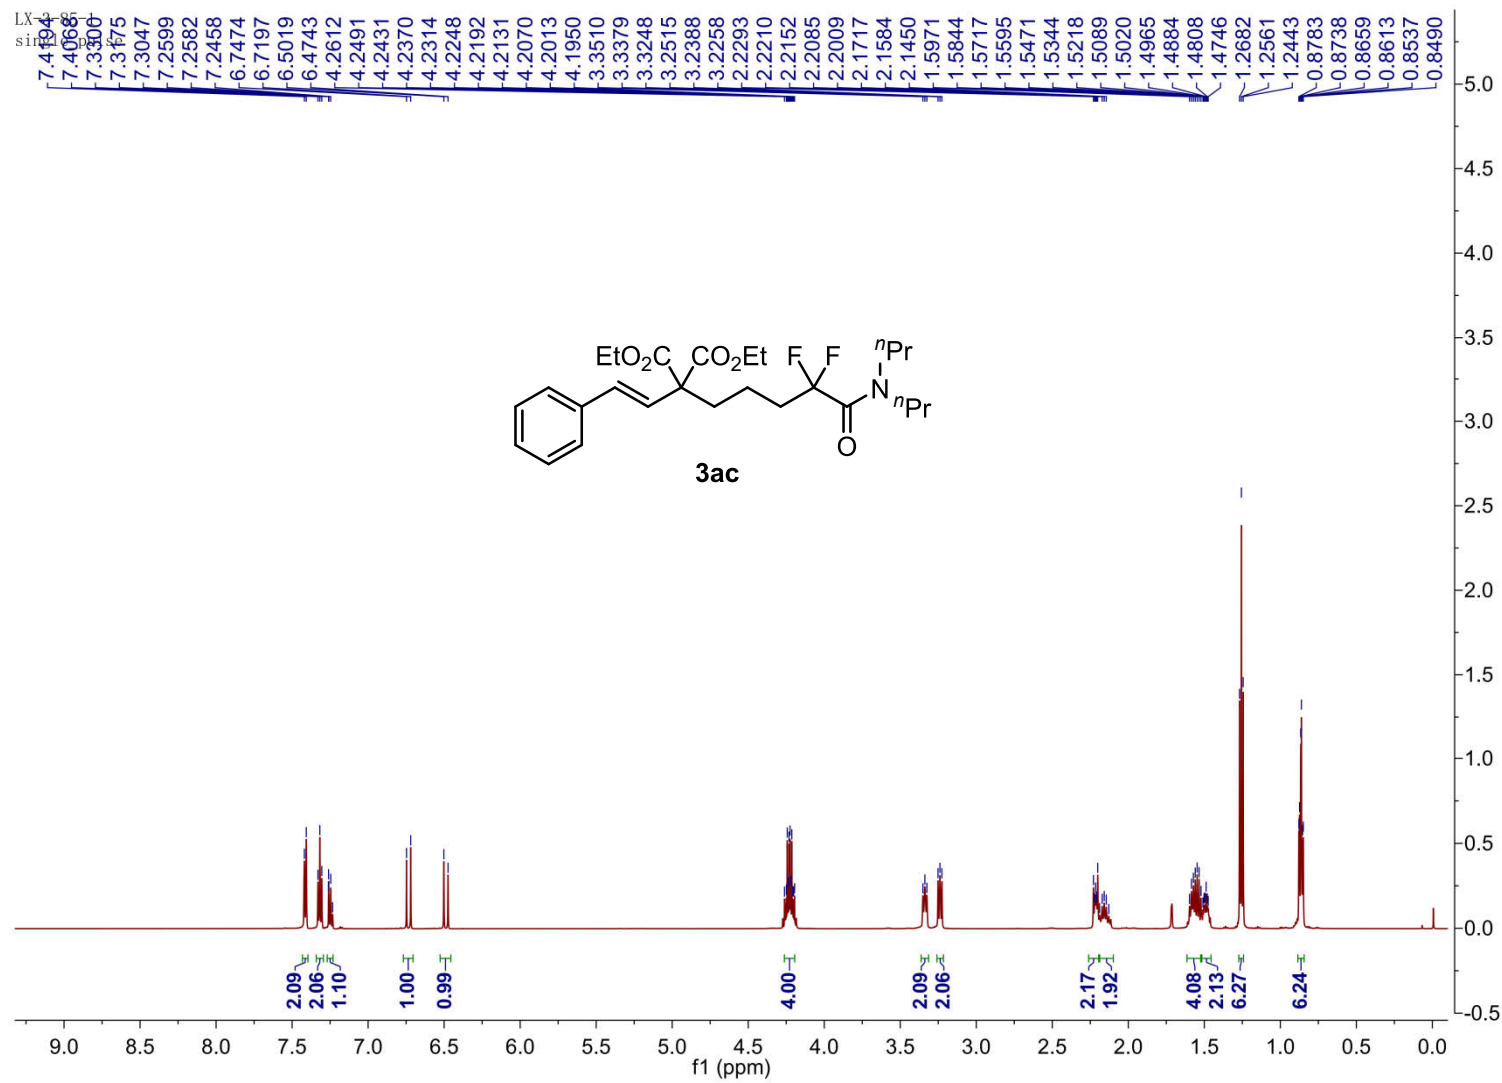

LX-3-85-1  
single\_pulse

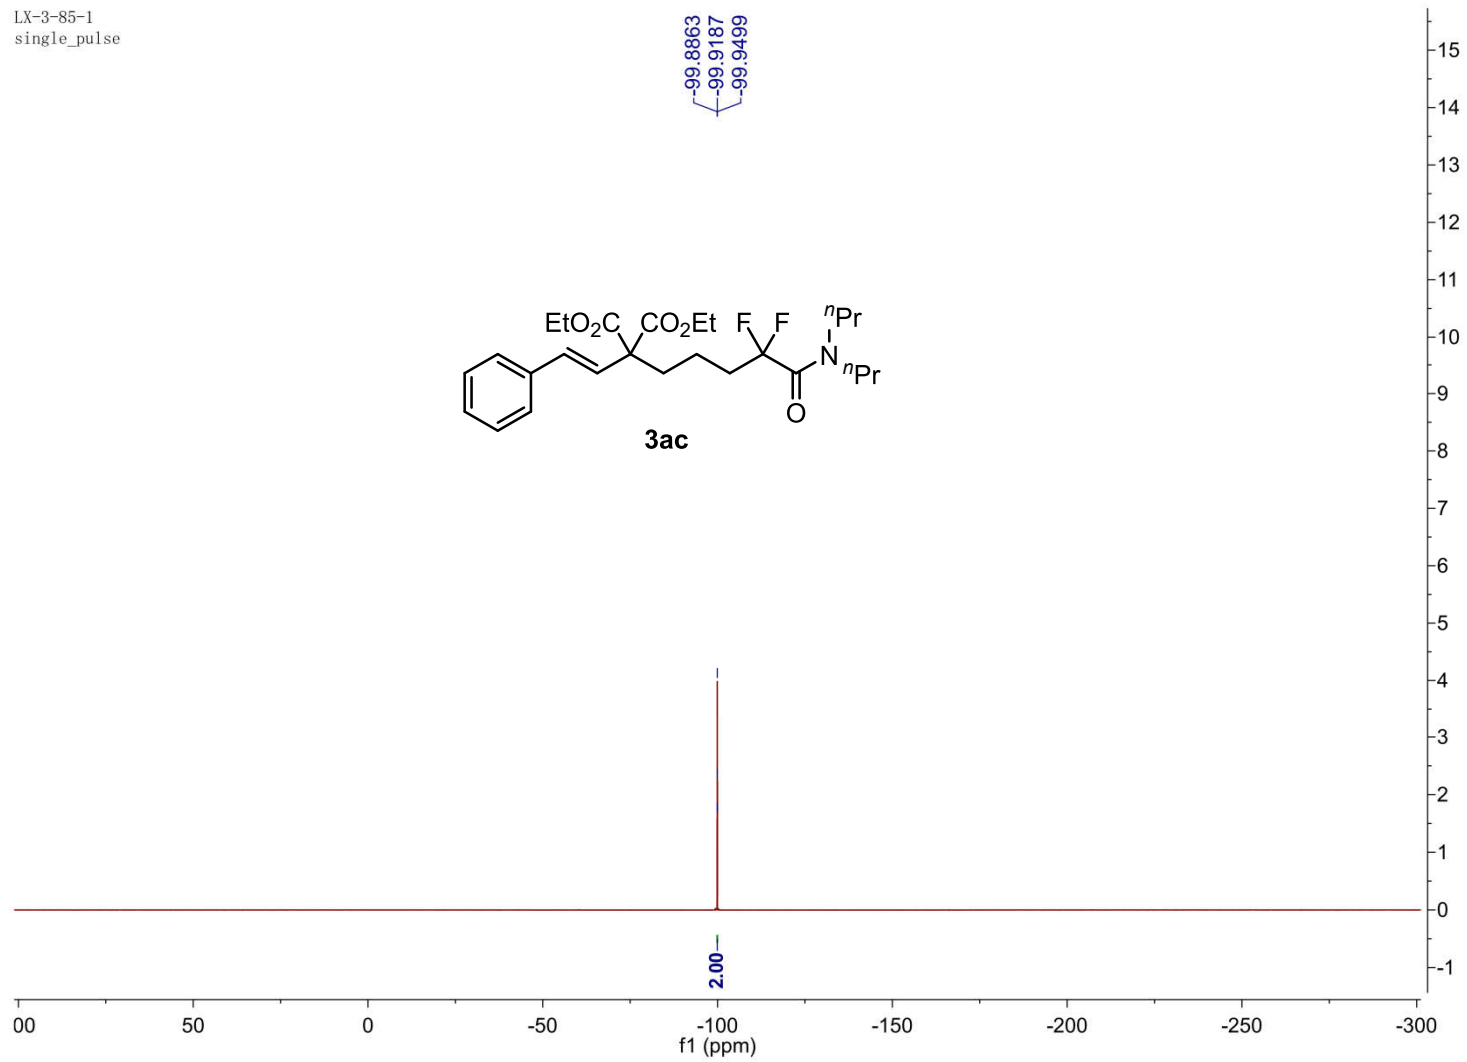

LX-3-85-1  
single pulse decoupled gated

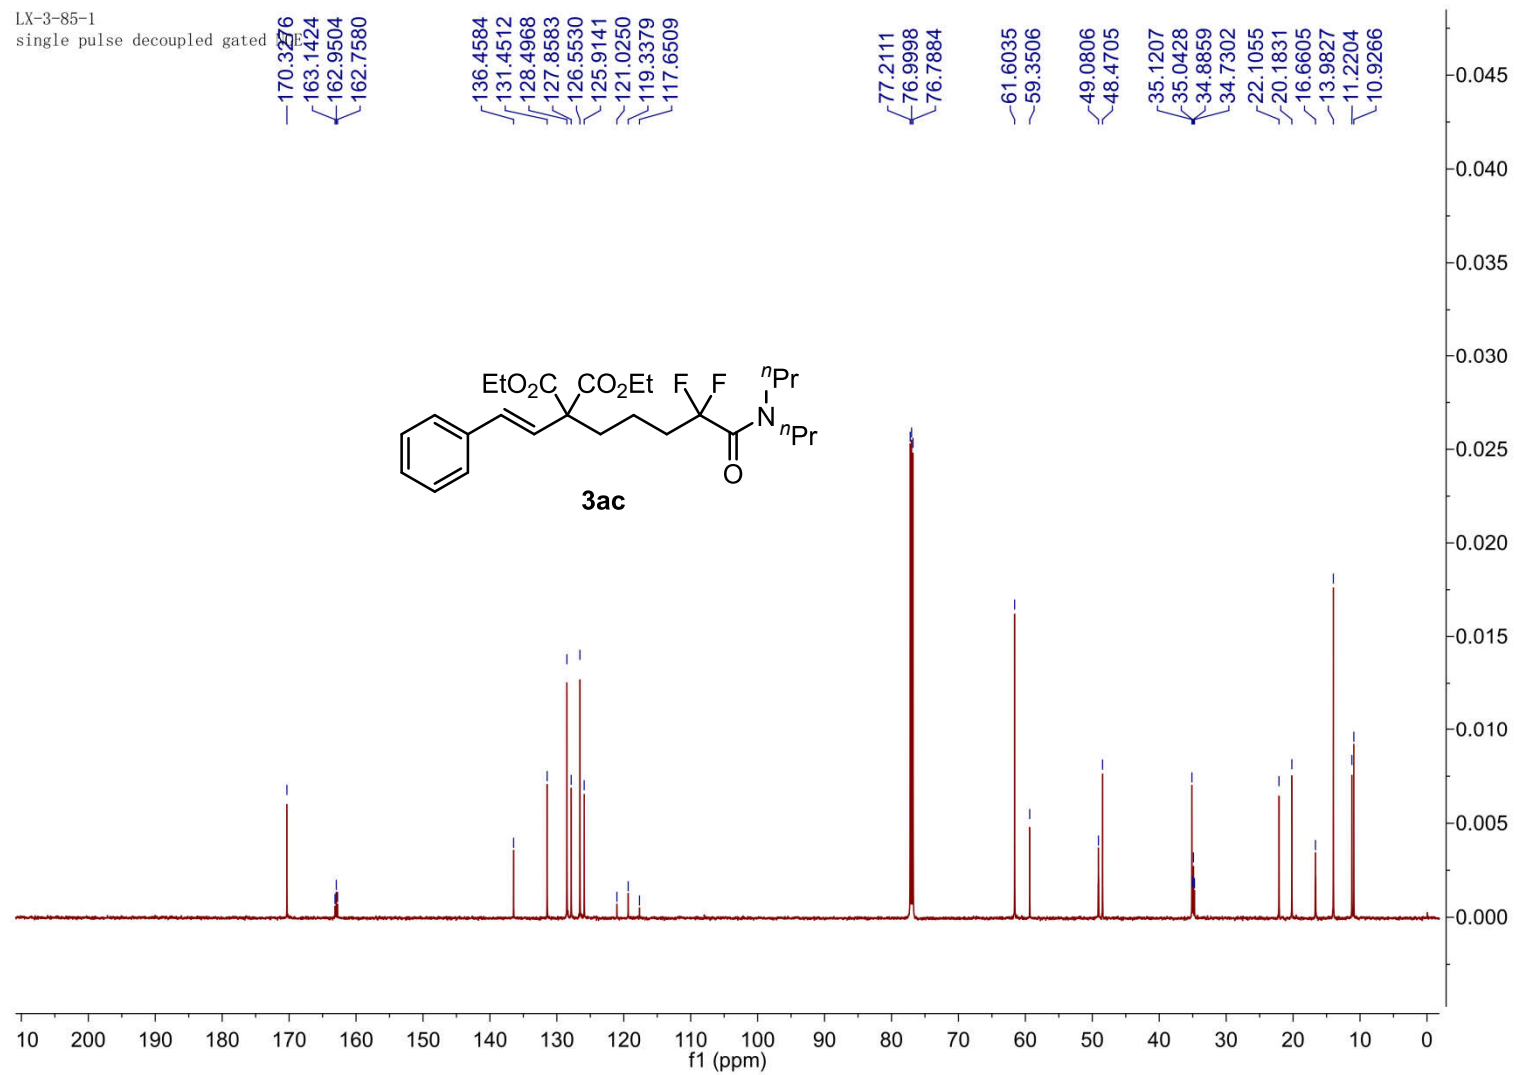

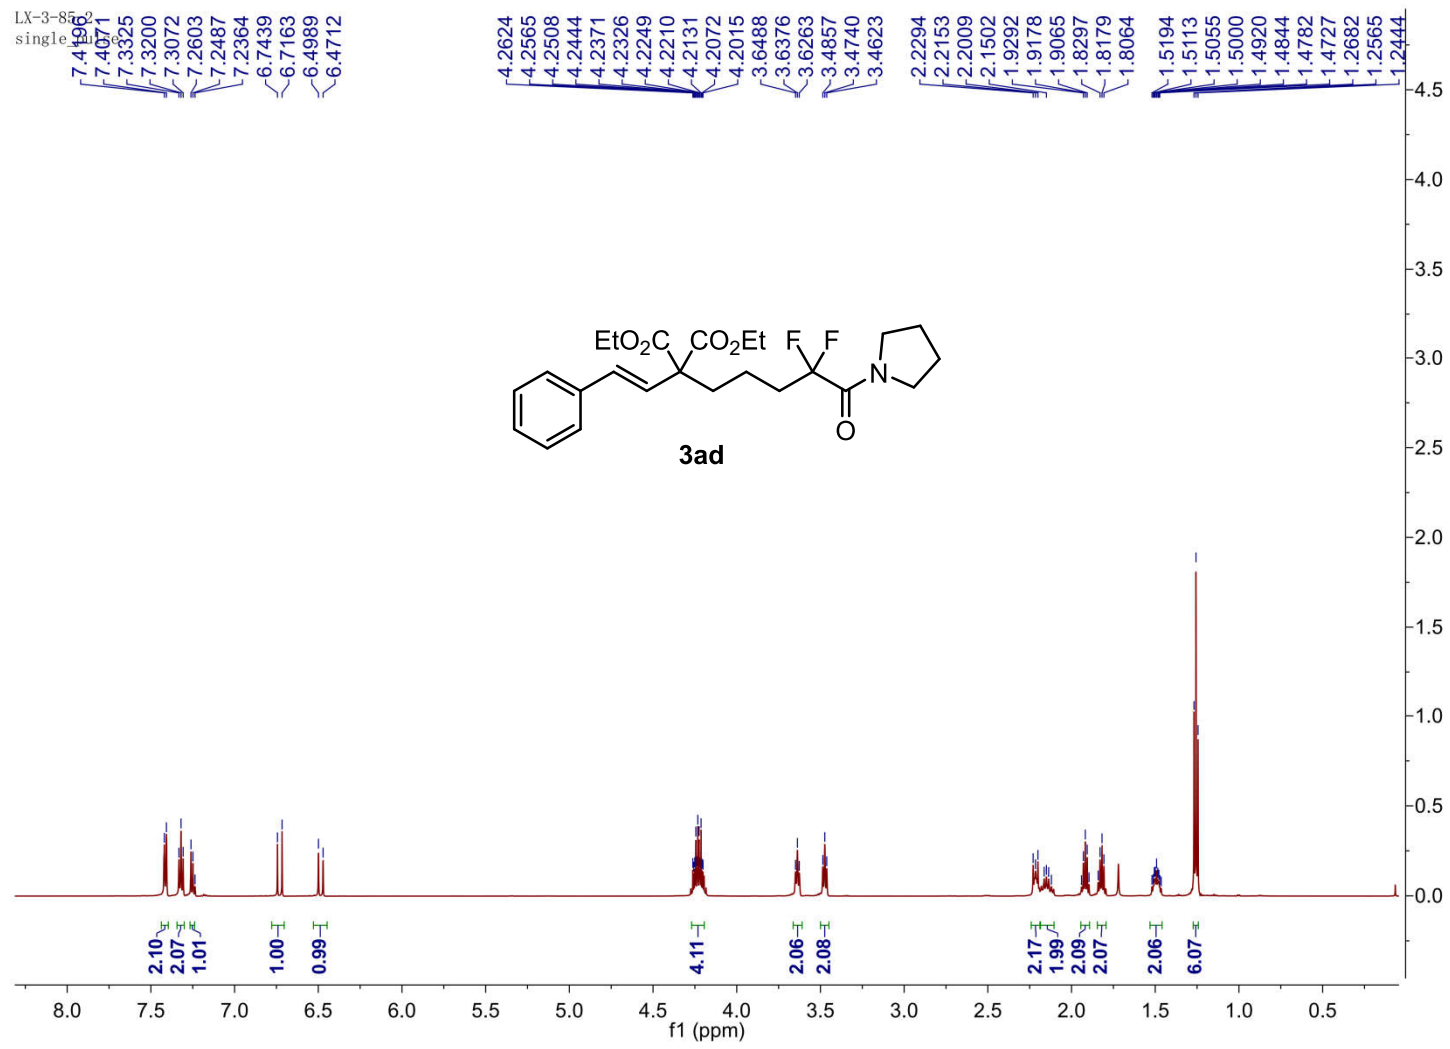



LX-3-85-2  
single\_pulse

103.3984  
103.4316  
103.4644

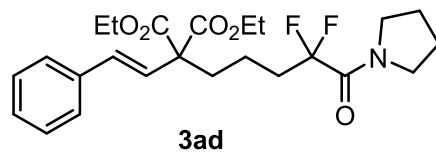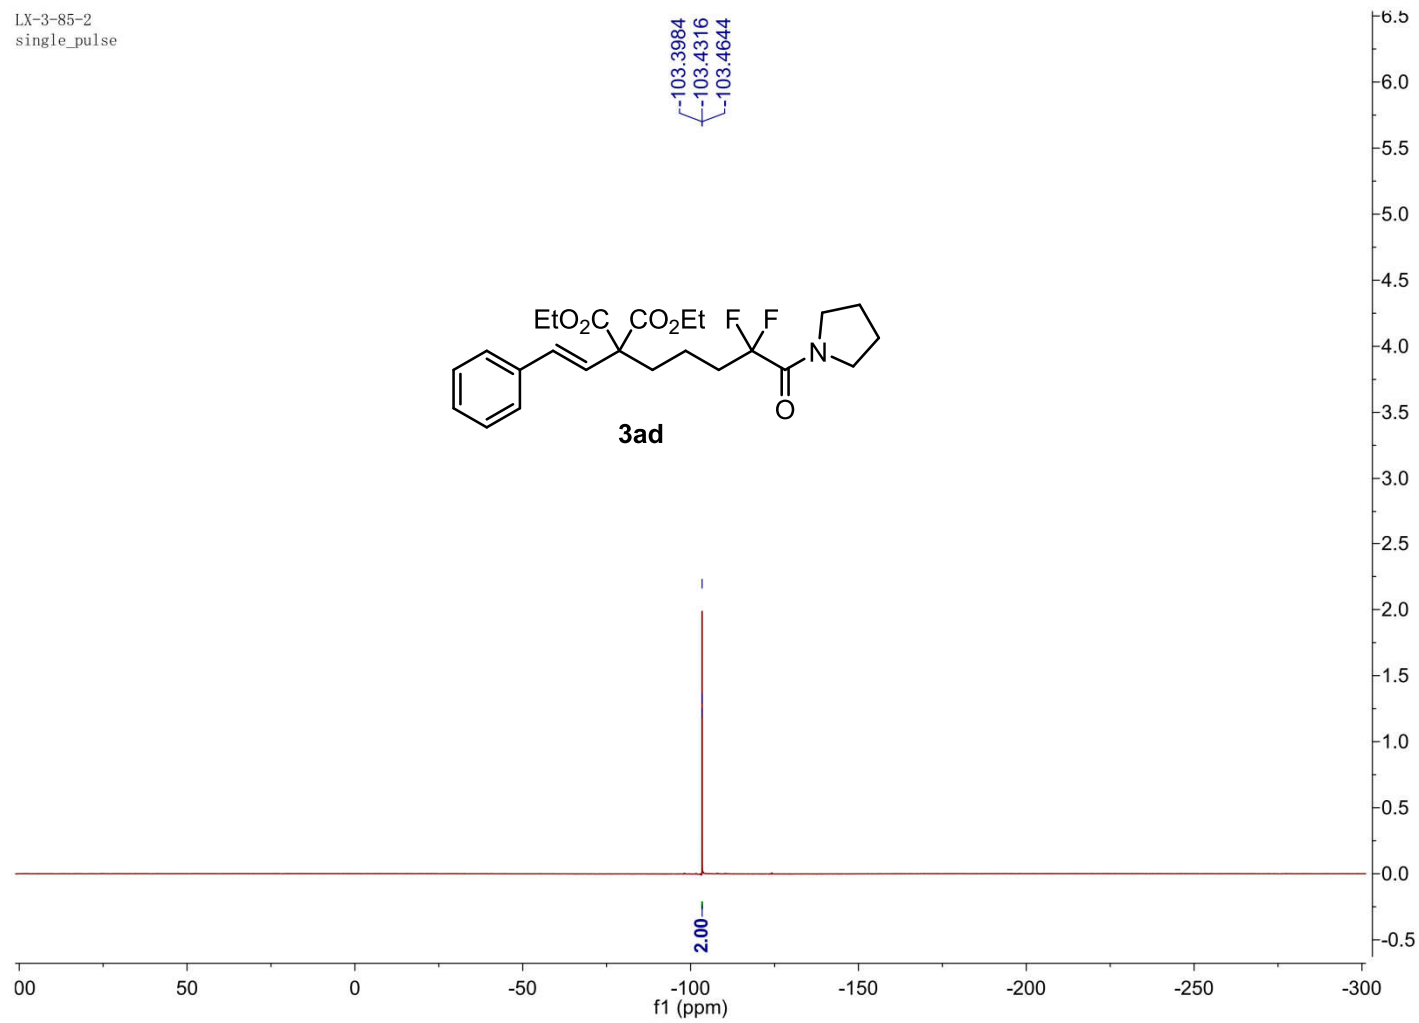

LX-3-85-2  
single pulse decoupled gated NOE

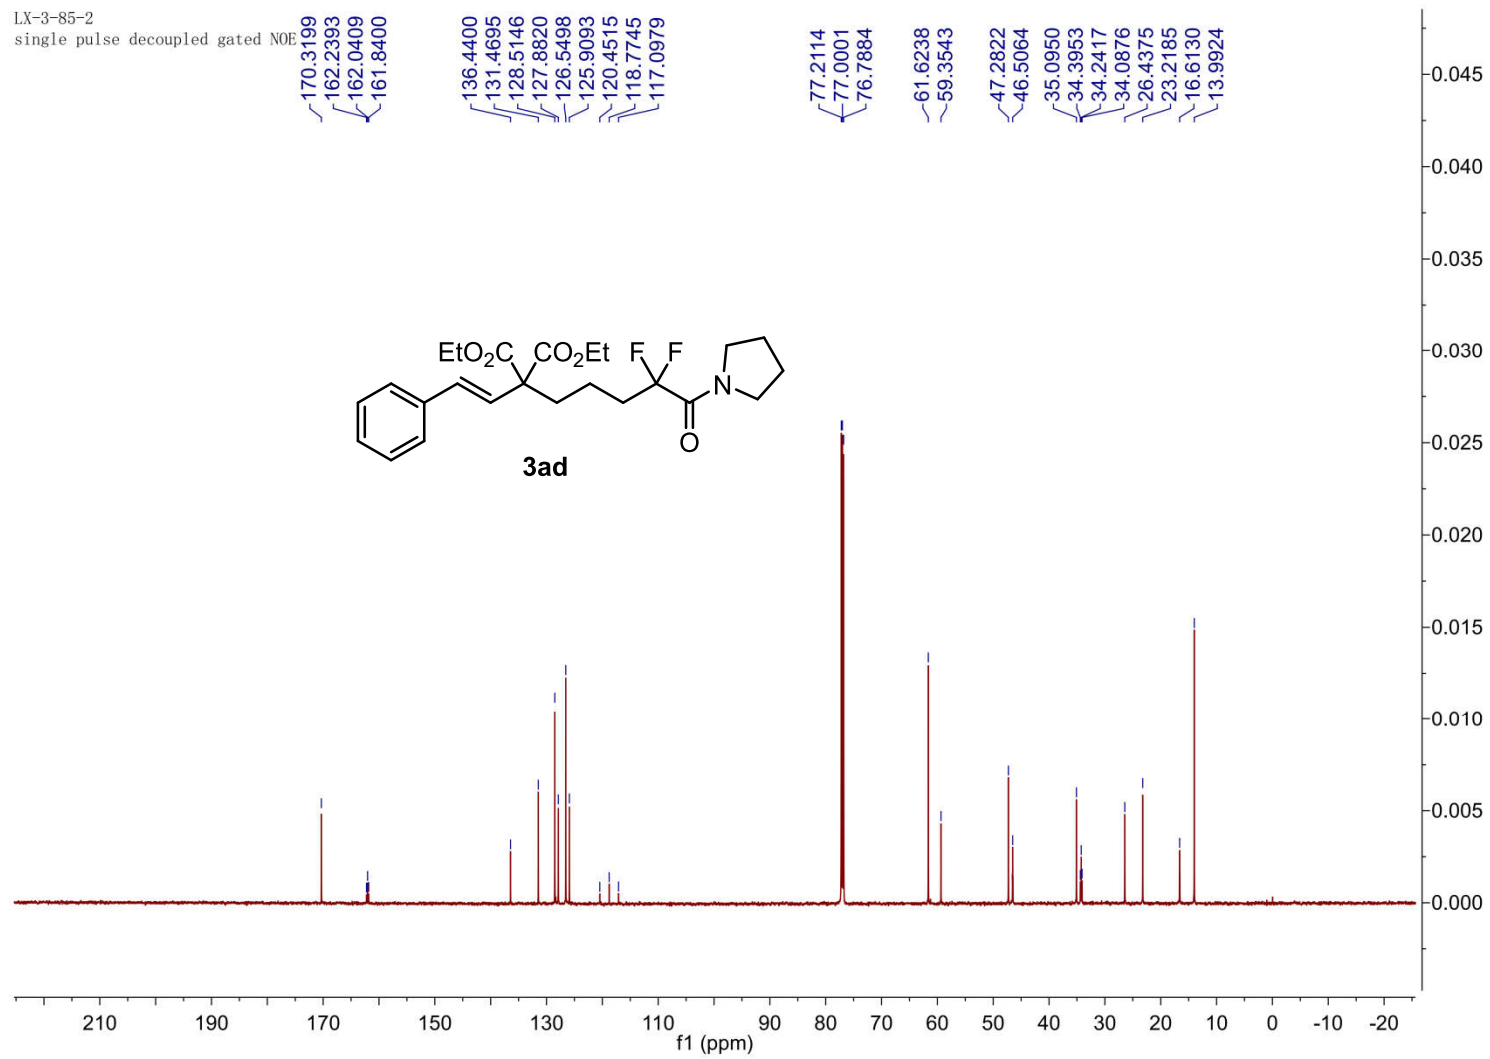

LX-3-85-4  
single\_pulse

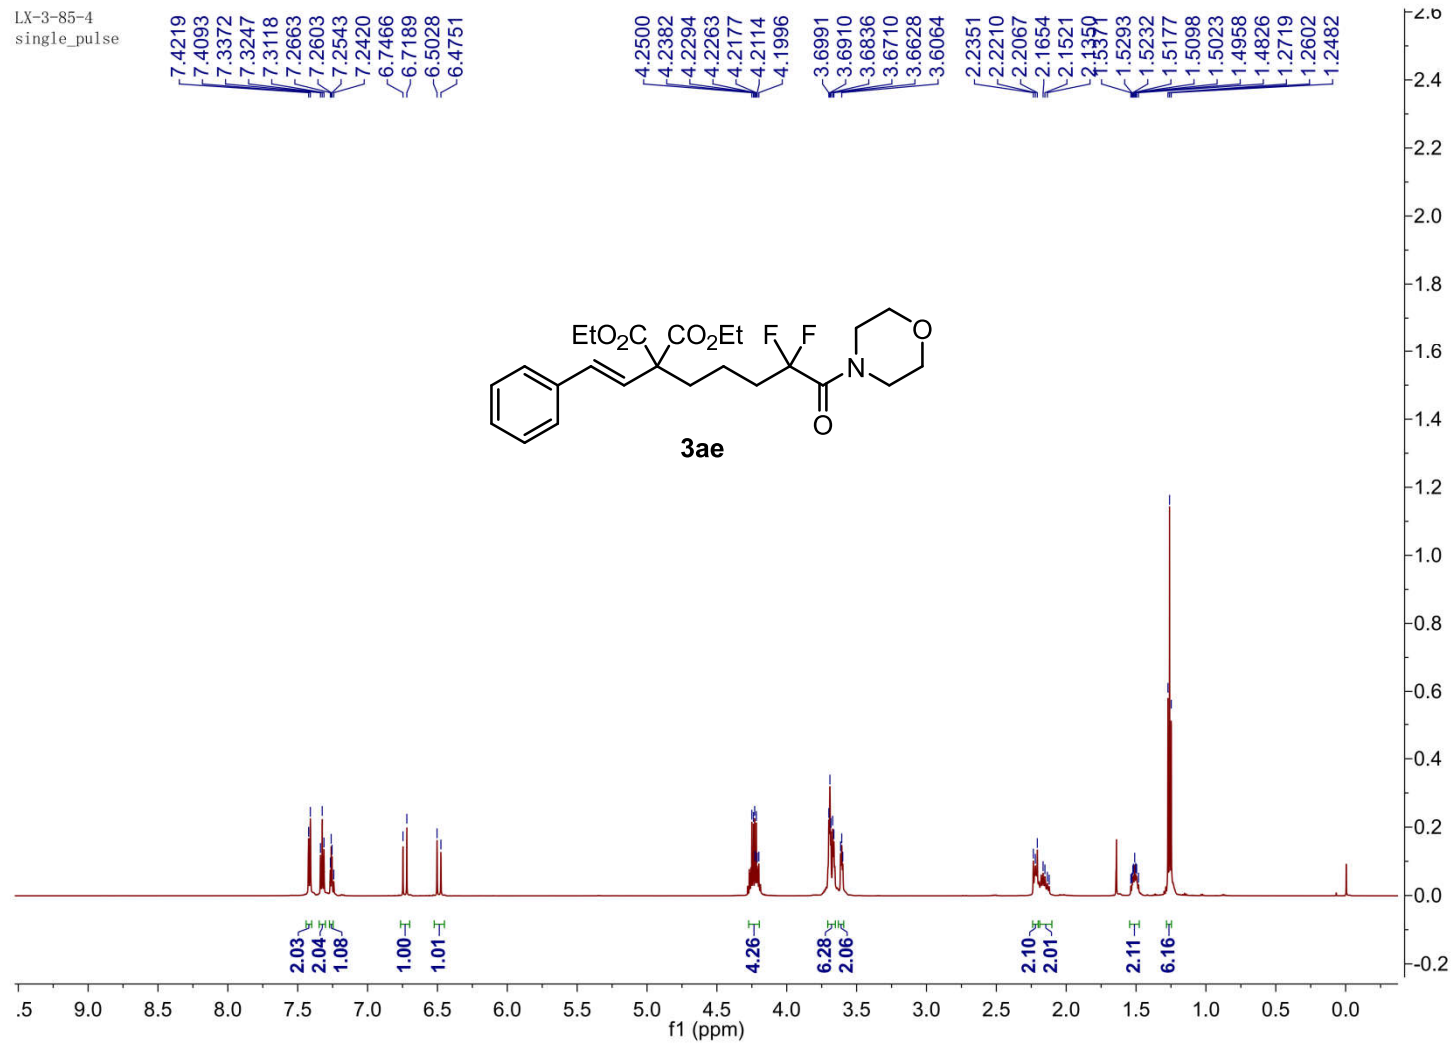

LX-3-85-4  
single\_pulse

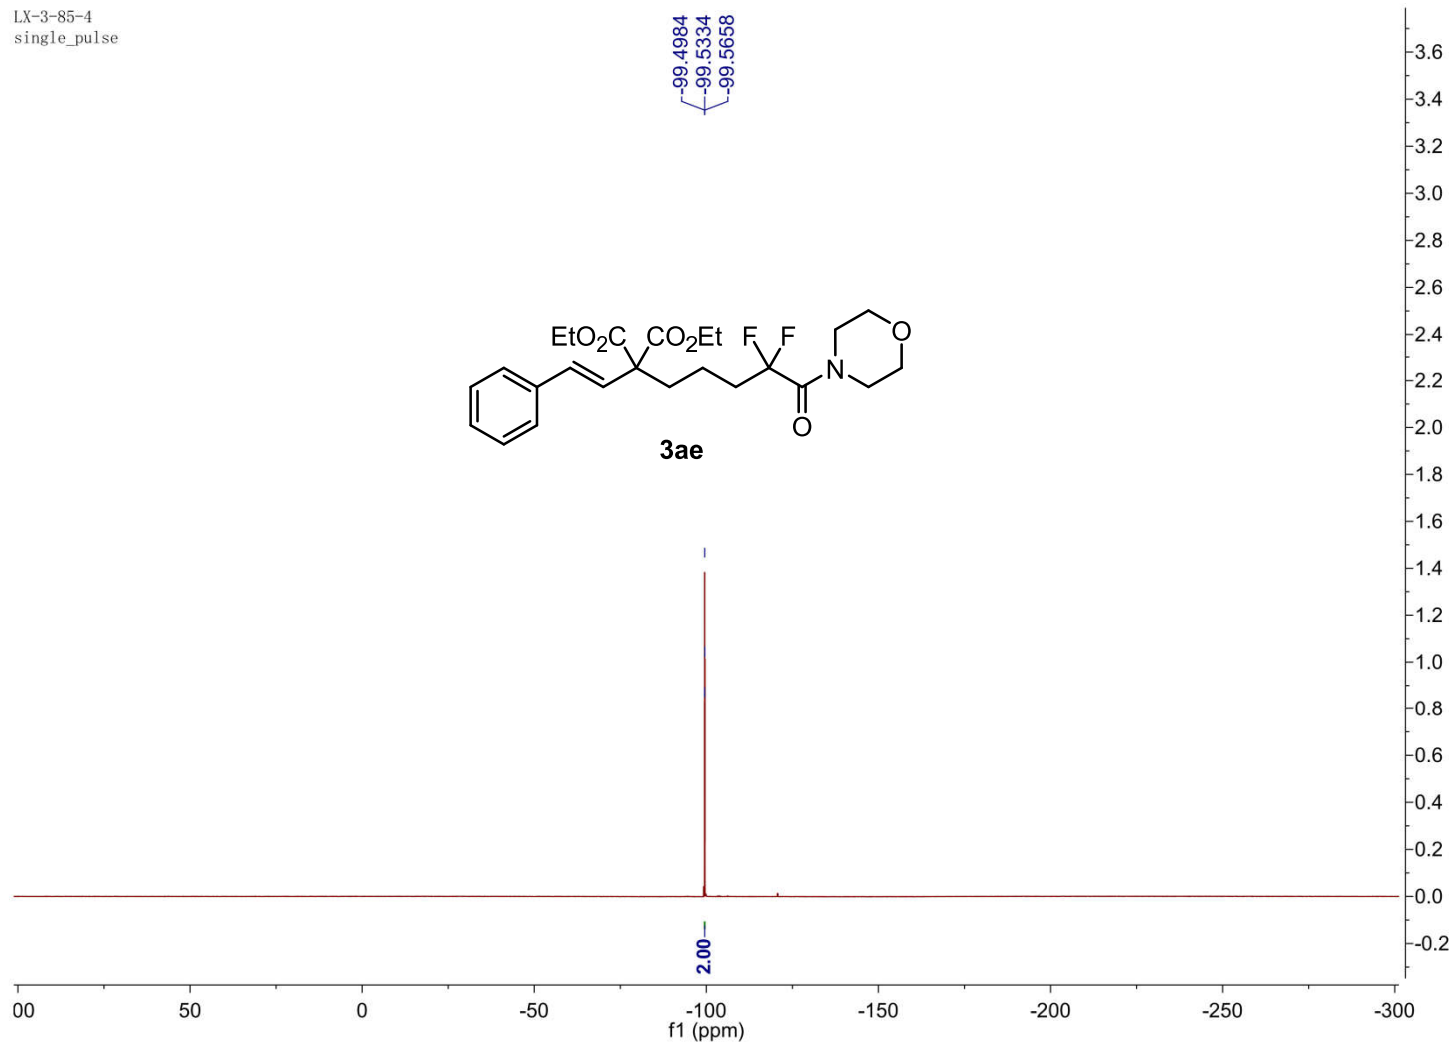

LX-3-85-4  
single pulse decoupled gated NOE

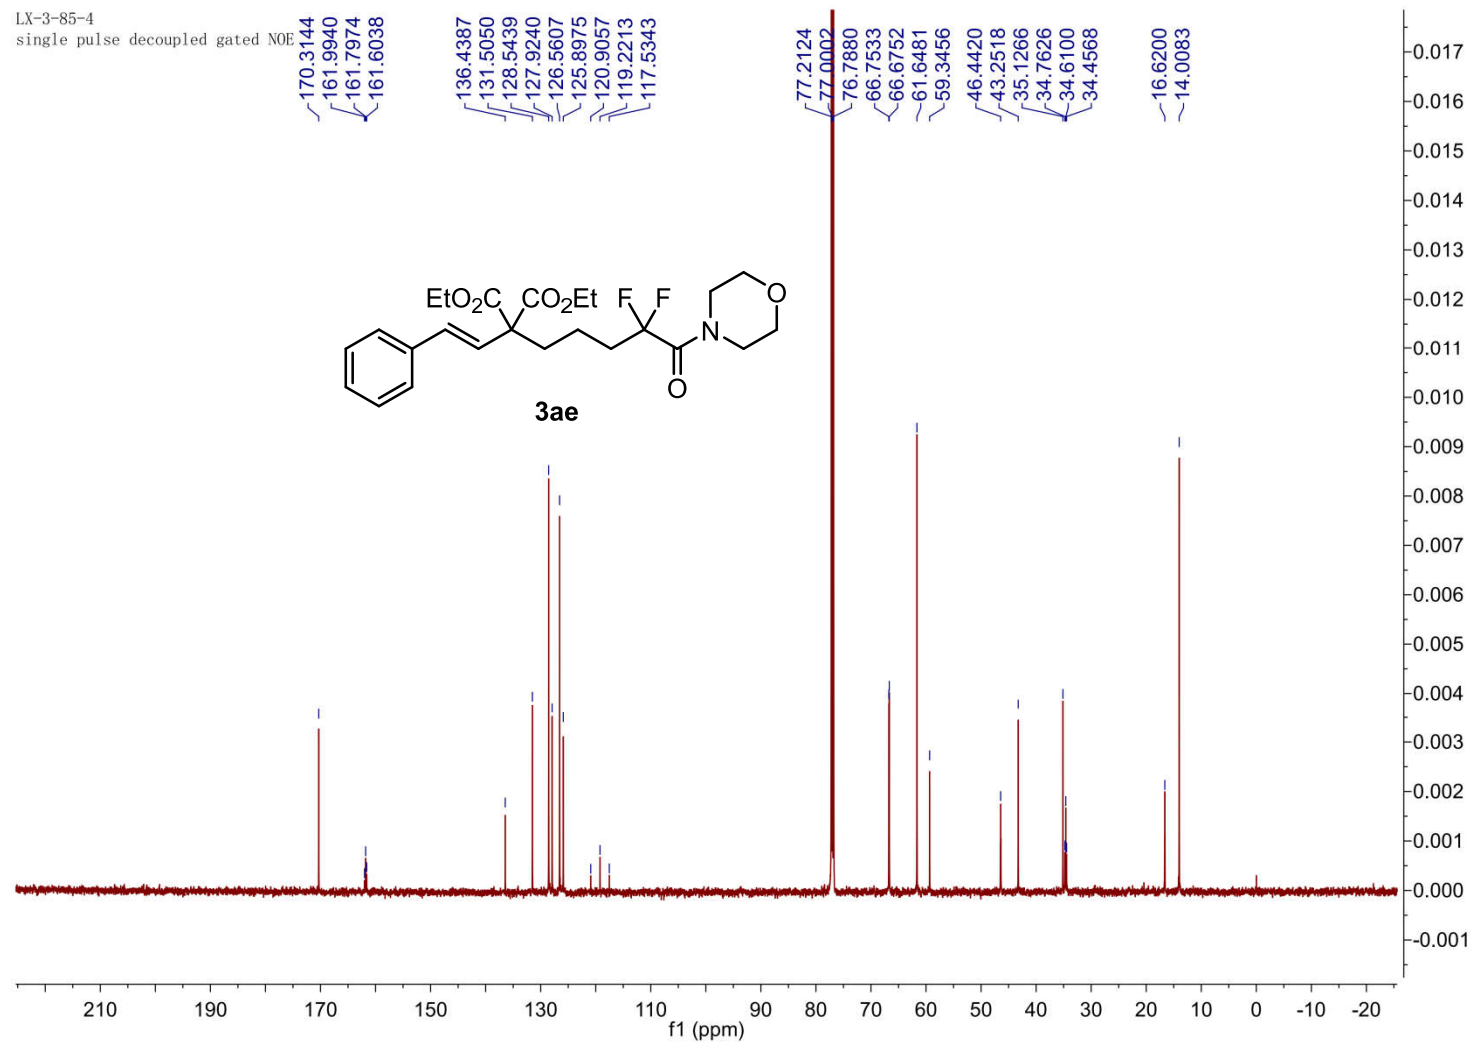

LX-3-85-3  
single\_pulse

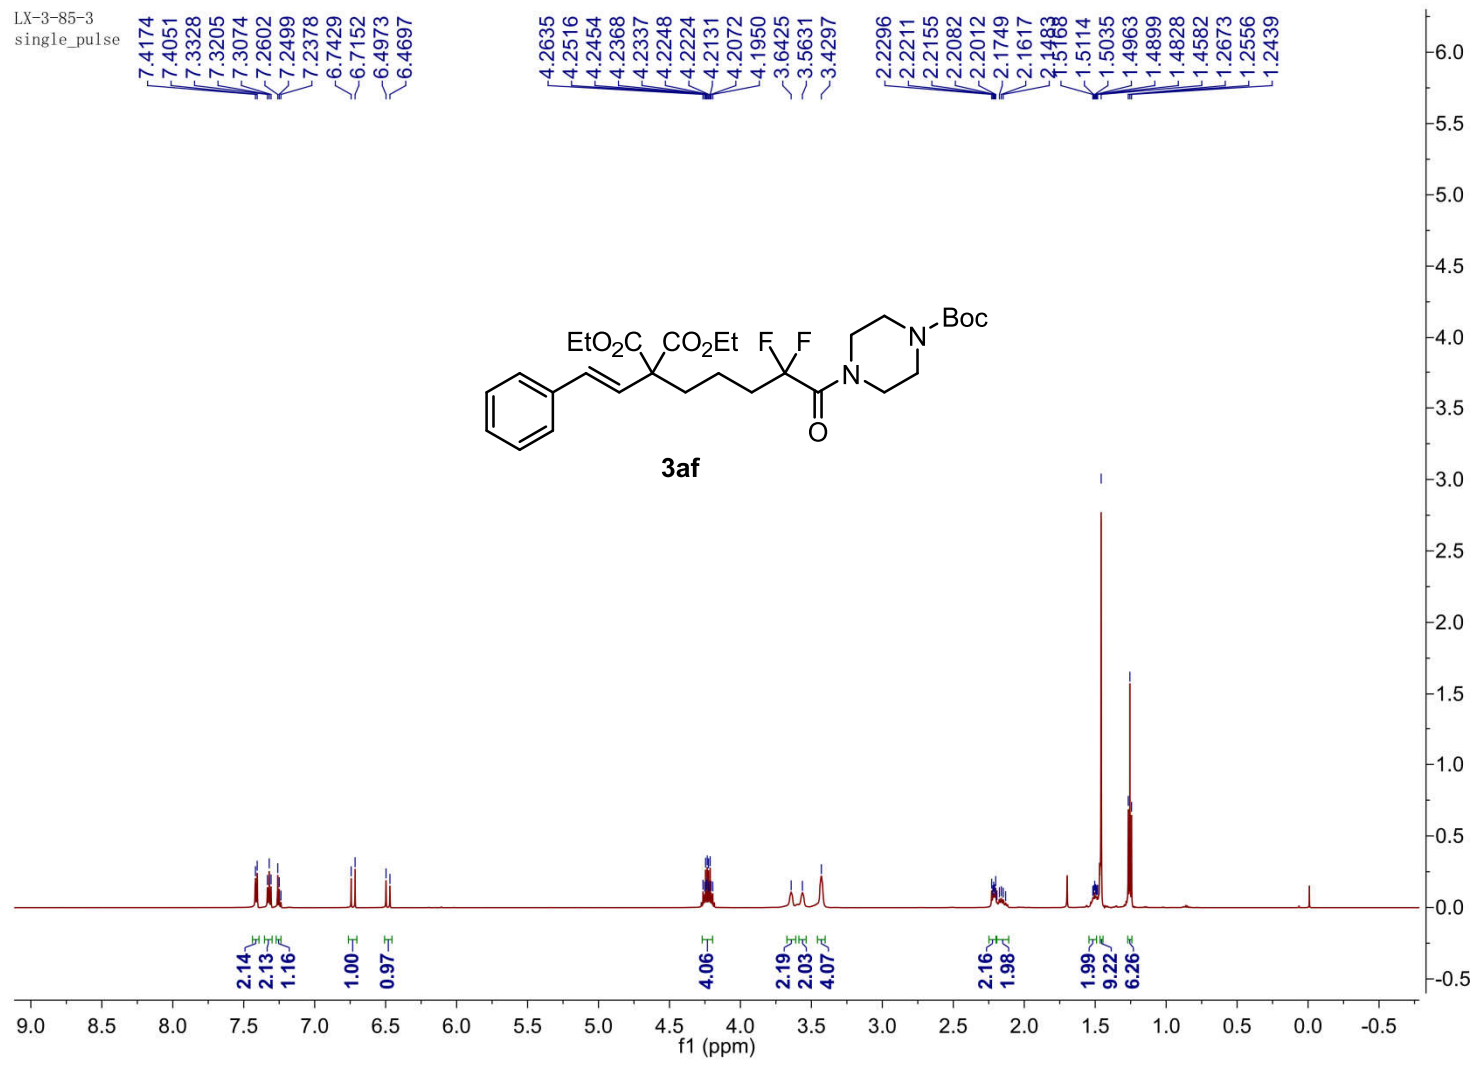

LX-3-85-3  
single\_pulse

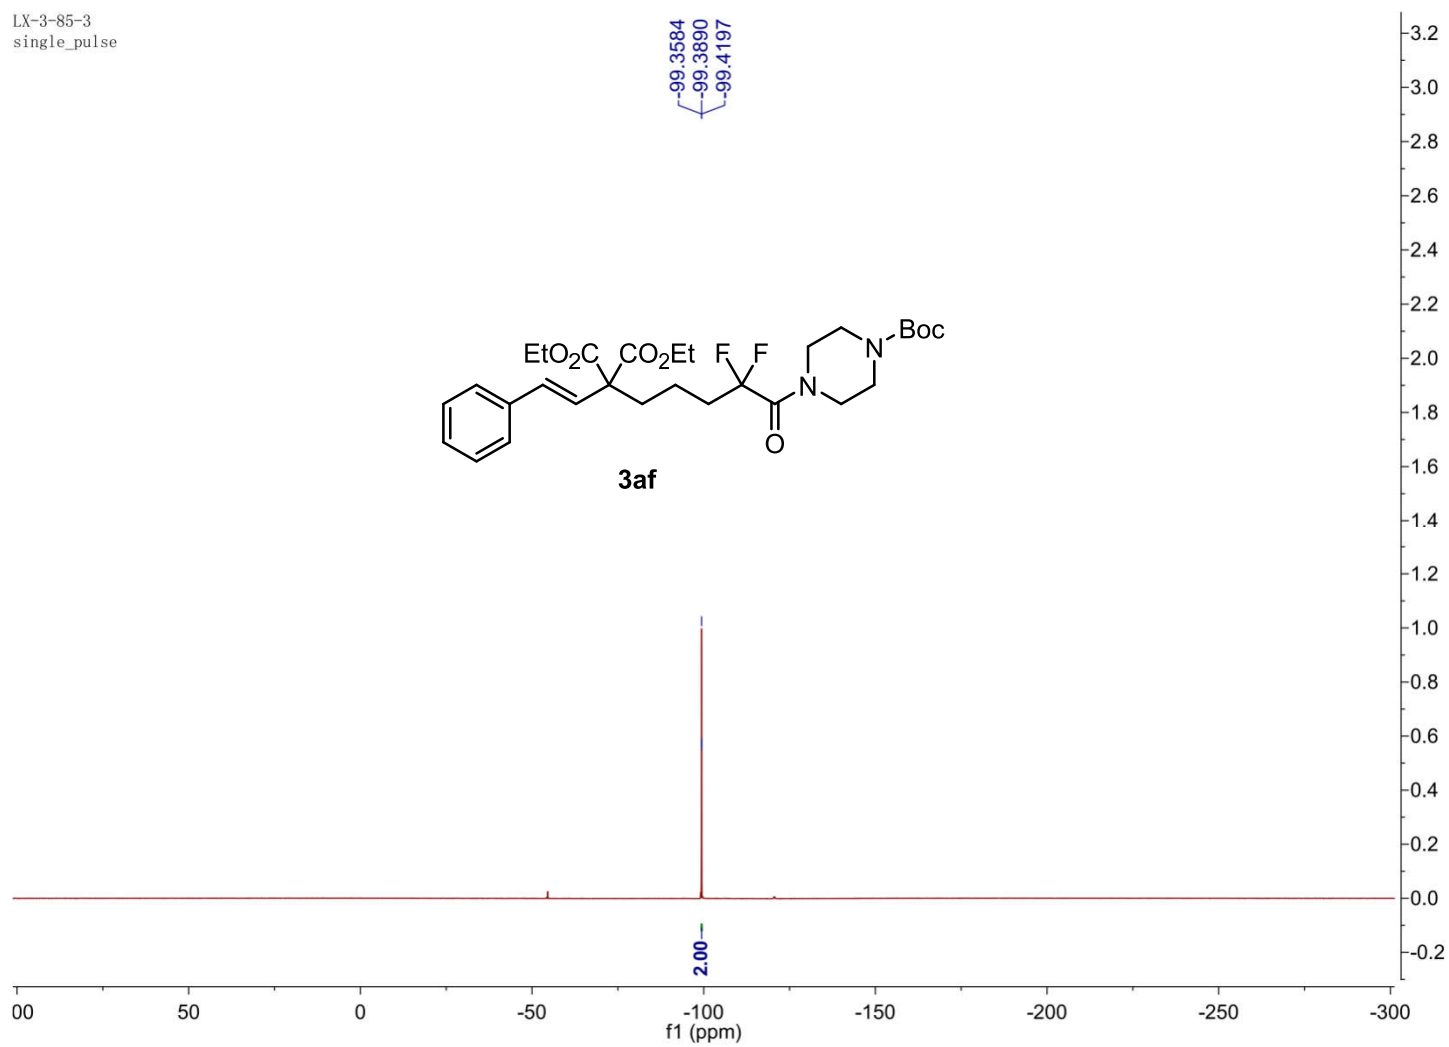

LX-3-85-3  
single pulse decoupled gated NOE

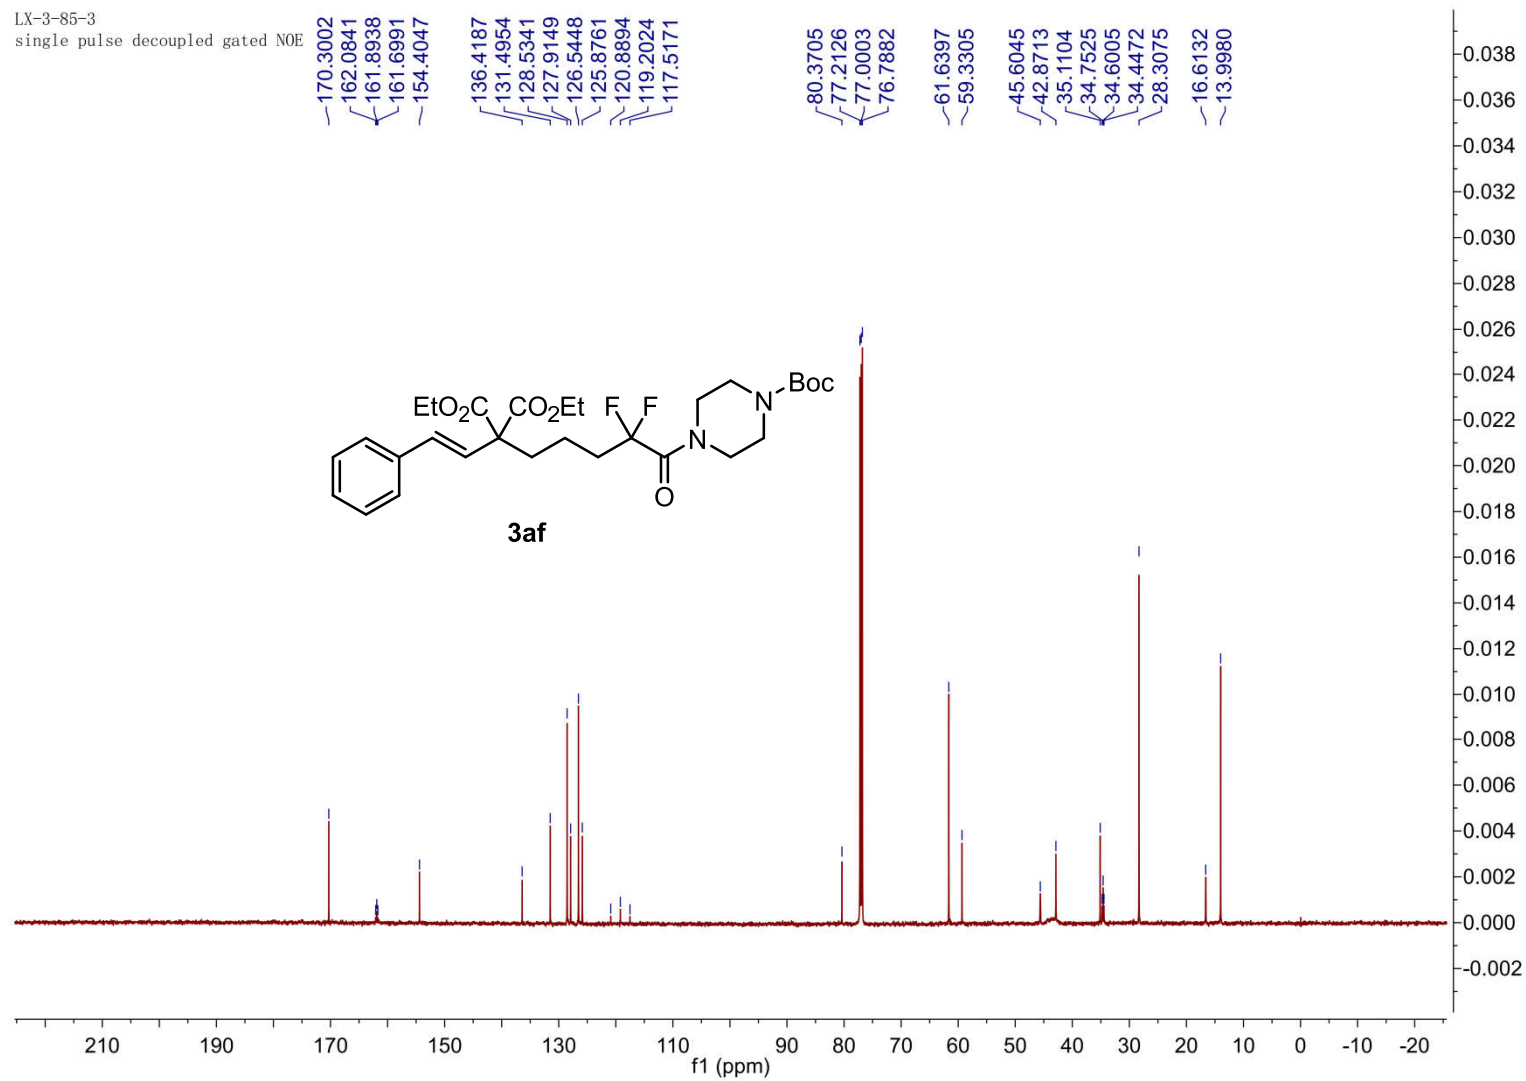



LX-3-83-2  
single\_pulse

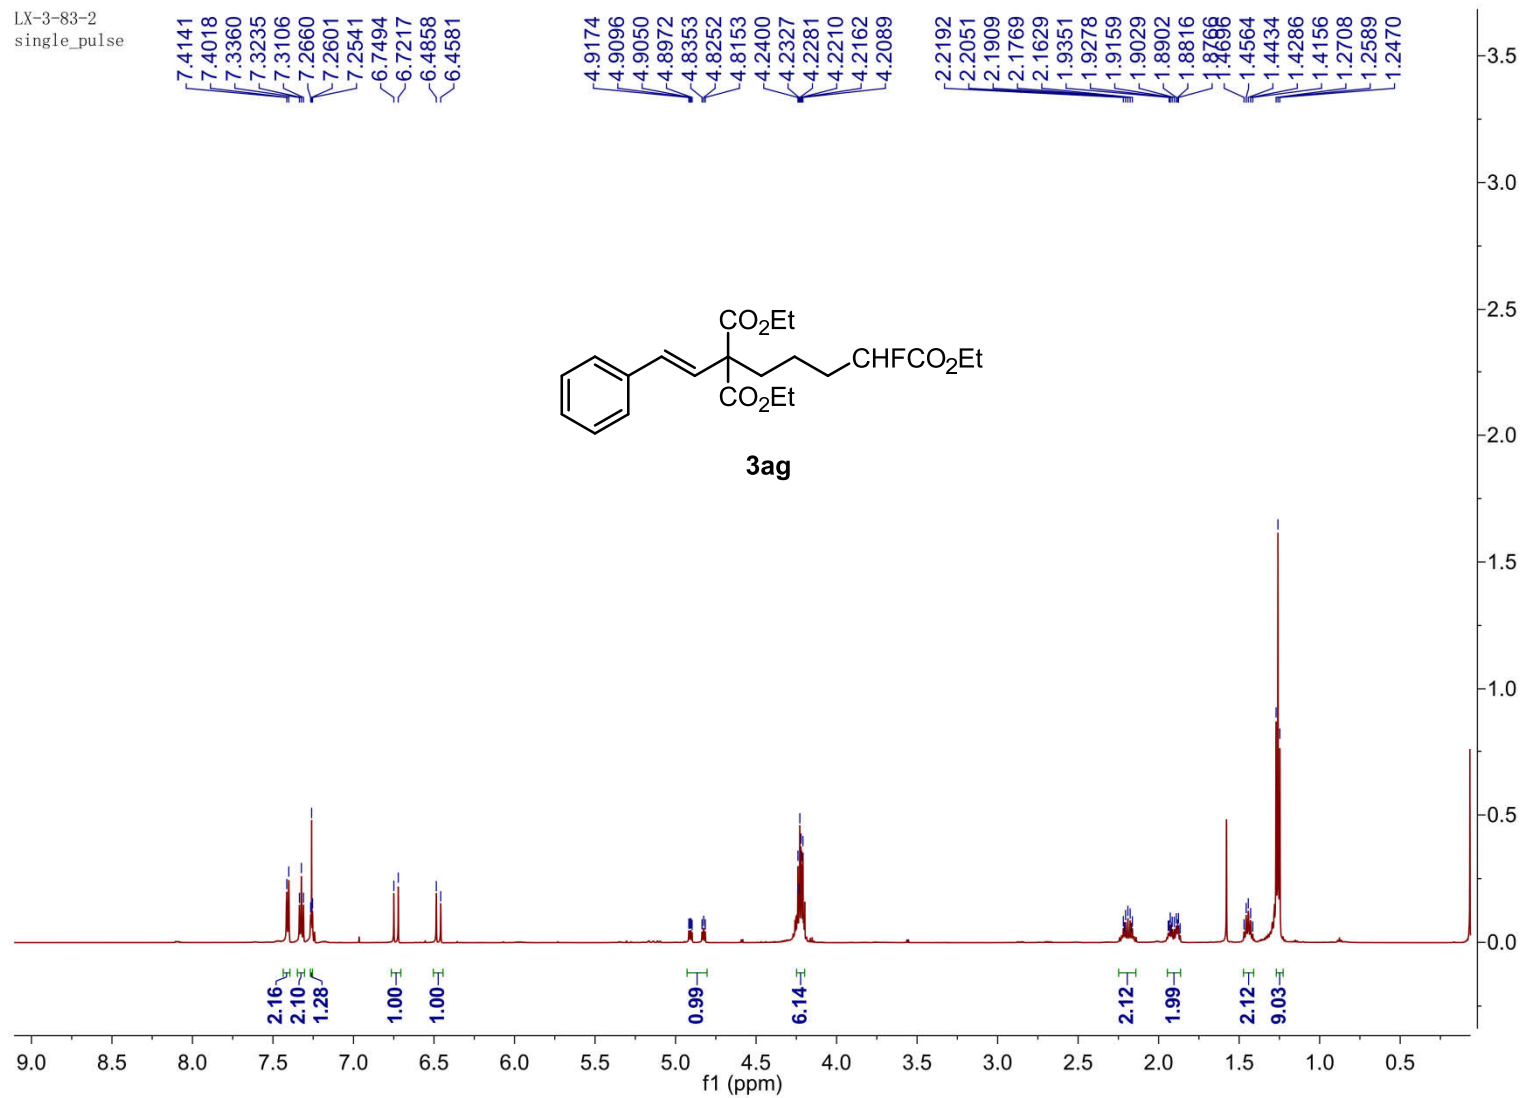

LX-3-83-2  
single\_pulse

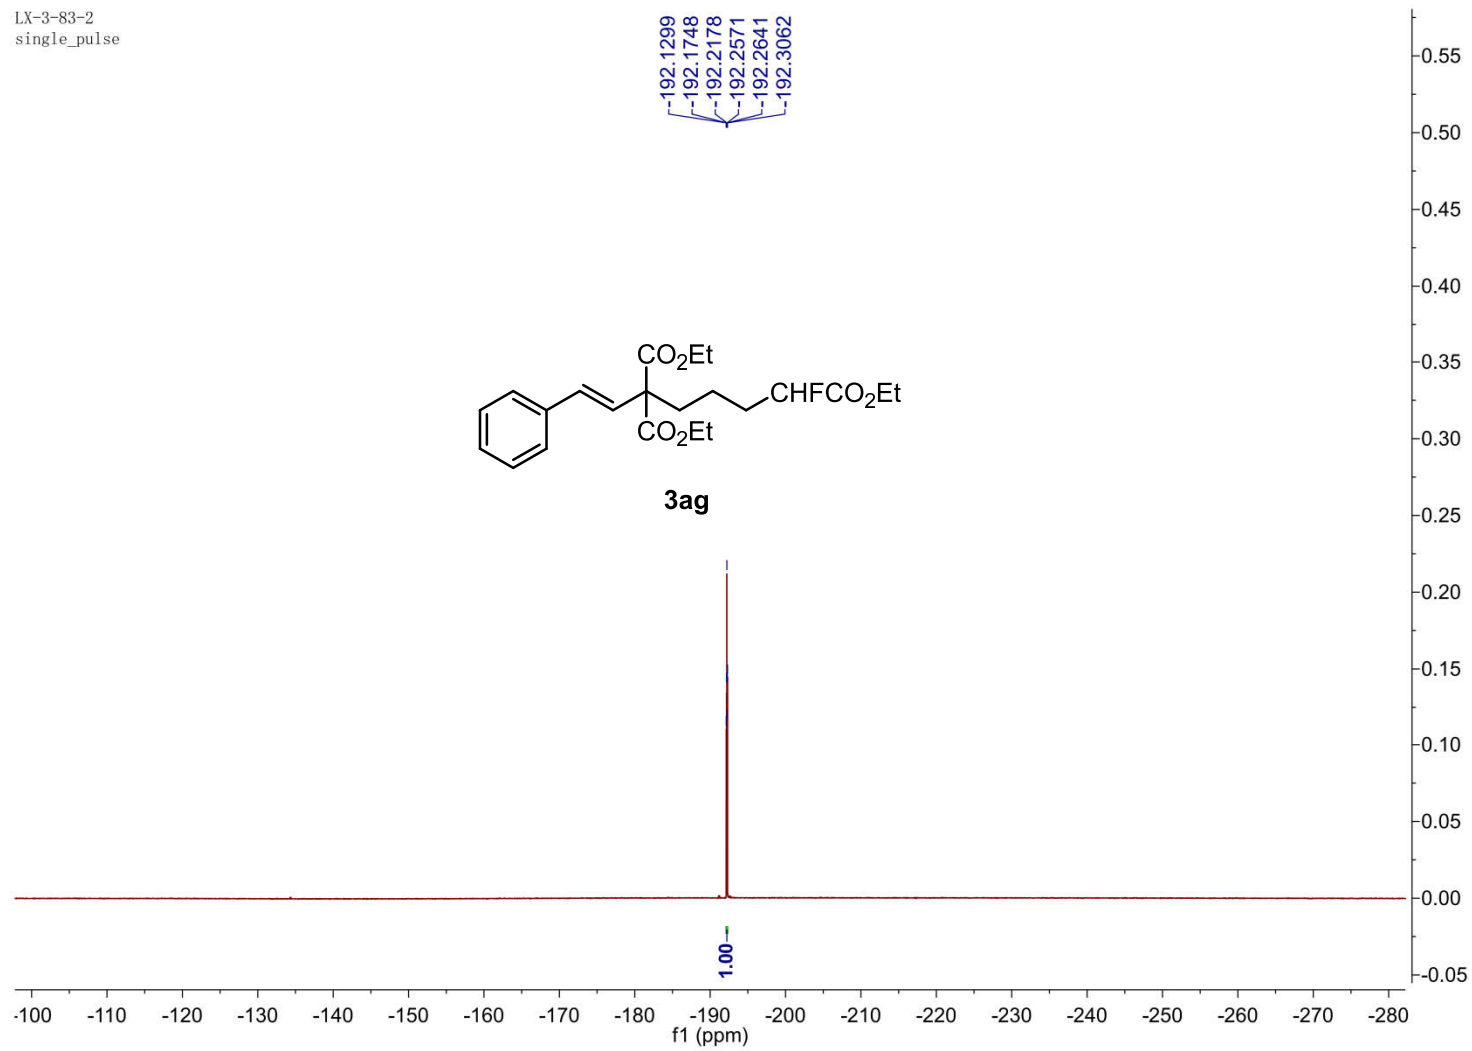

LX-3-83-2  
single pulse decoupled

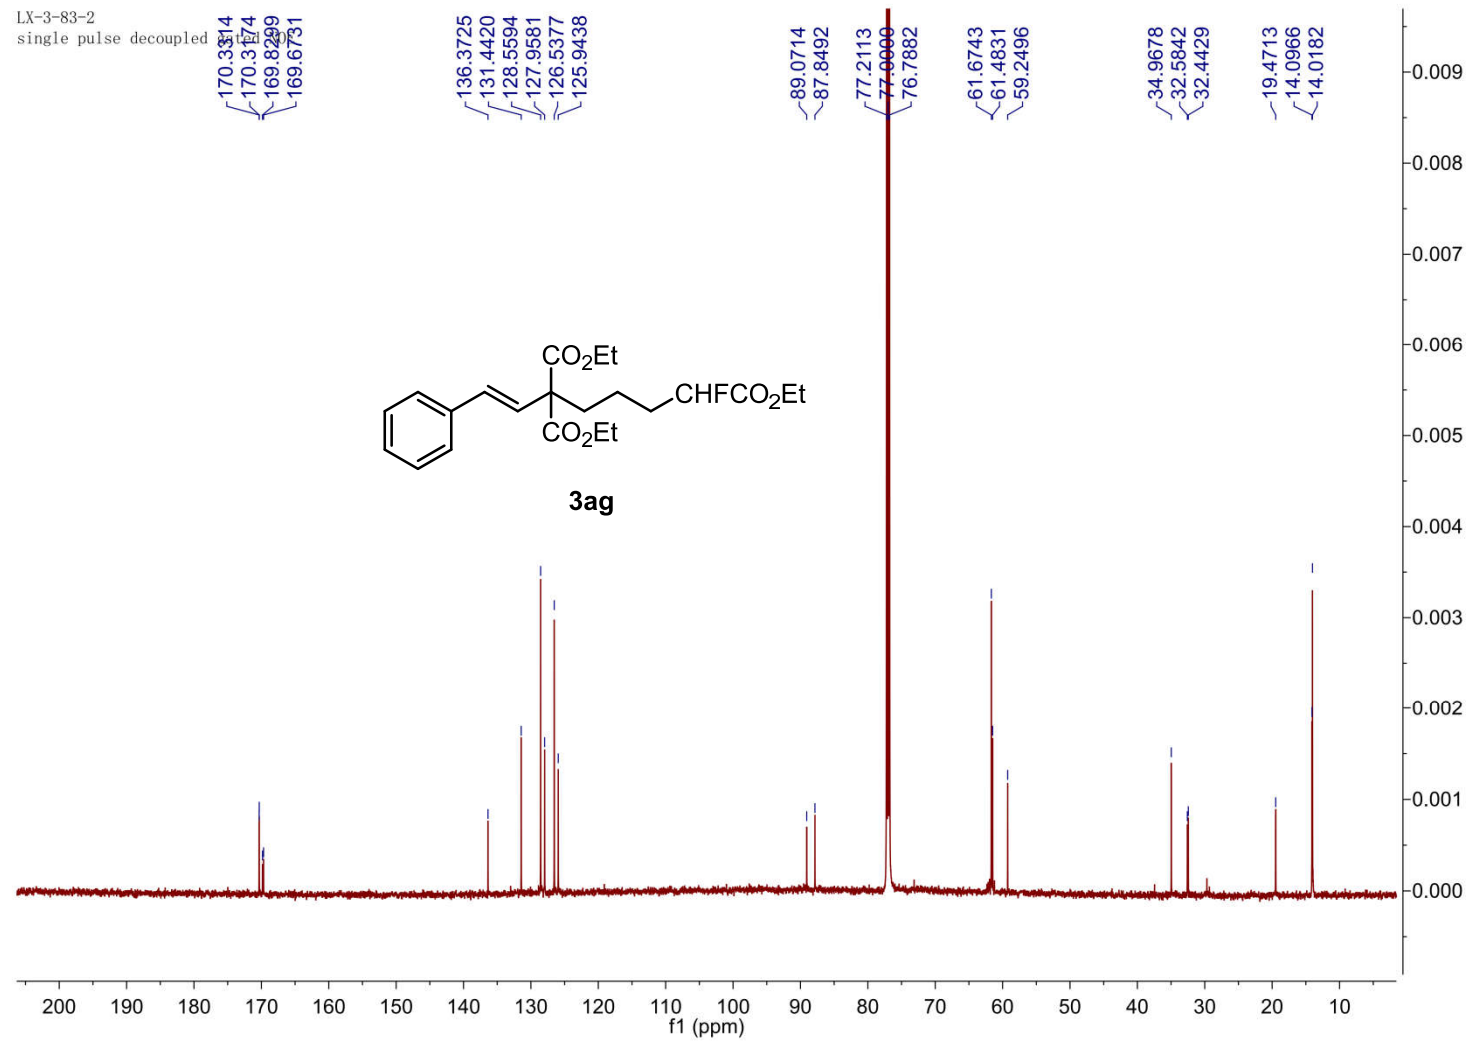

LX-3-83-1  
single\_pulse

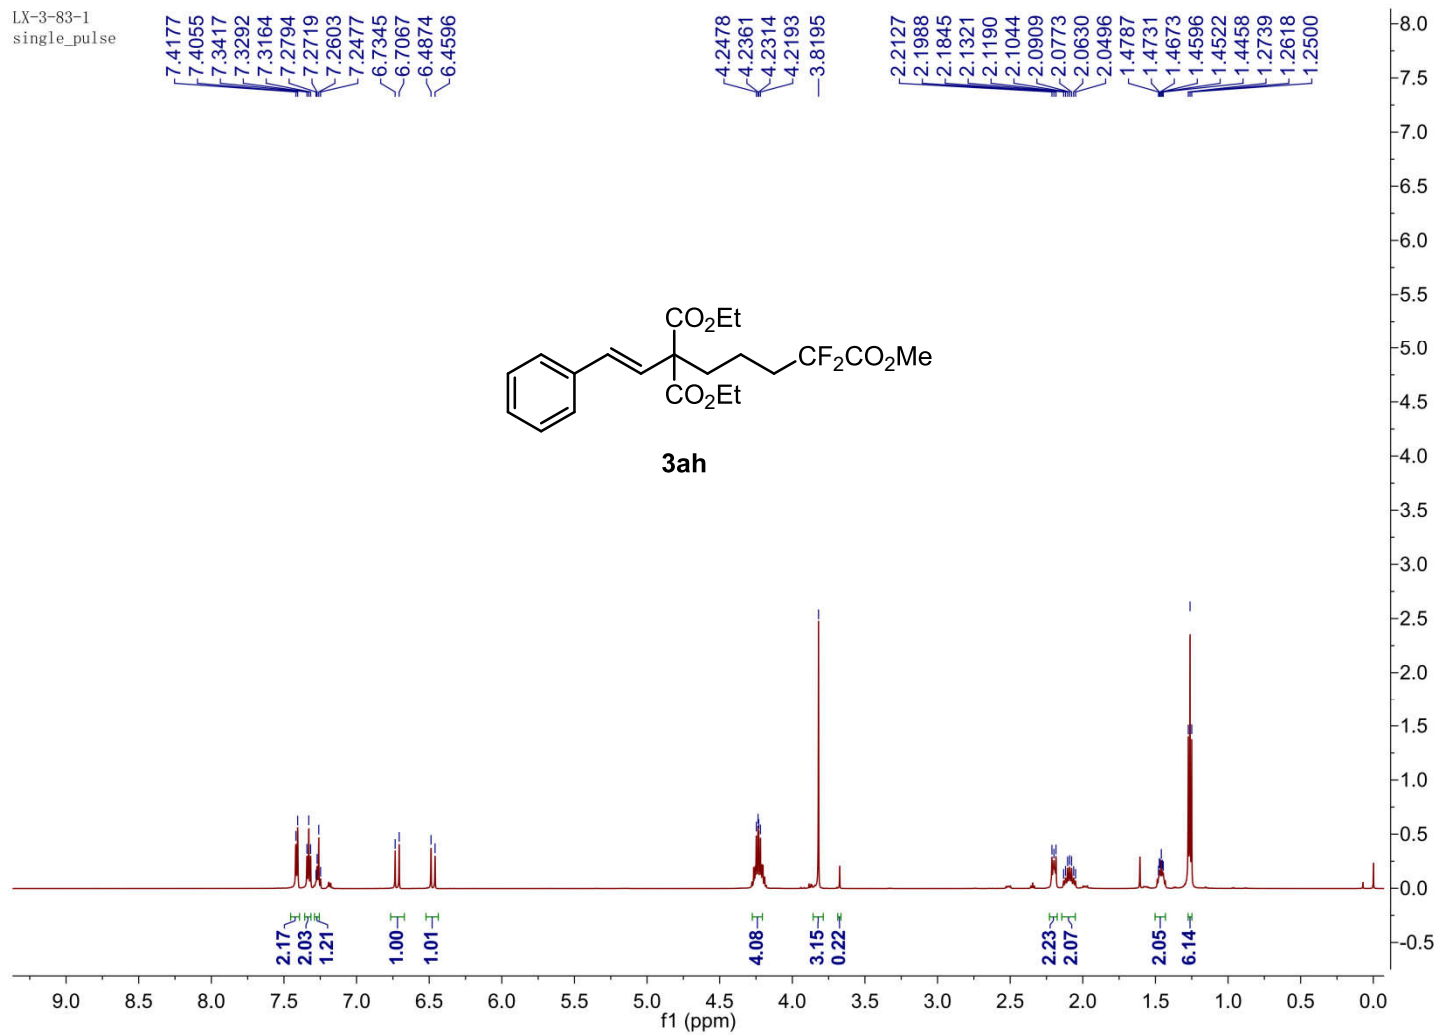

LX-3-83-1  
single\_pulse

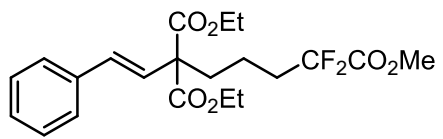

**3ah**

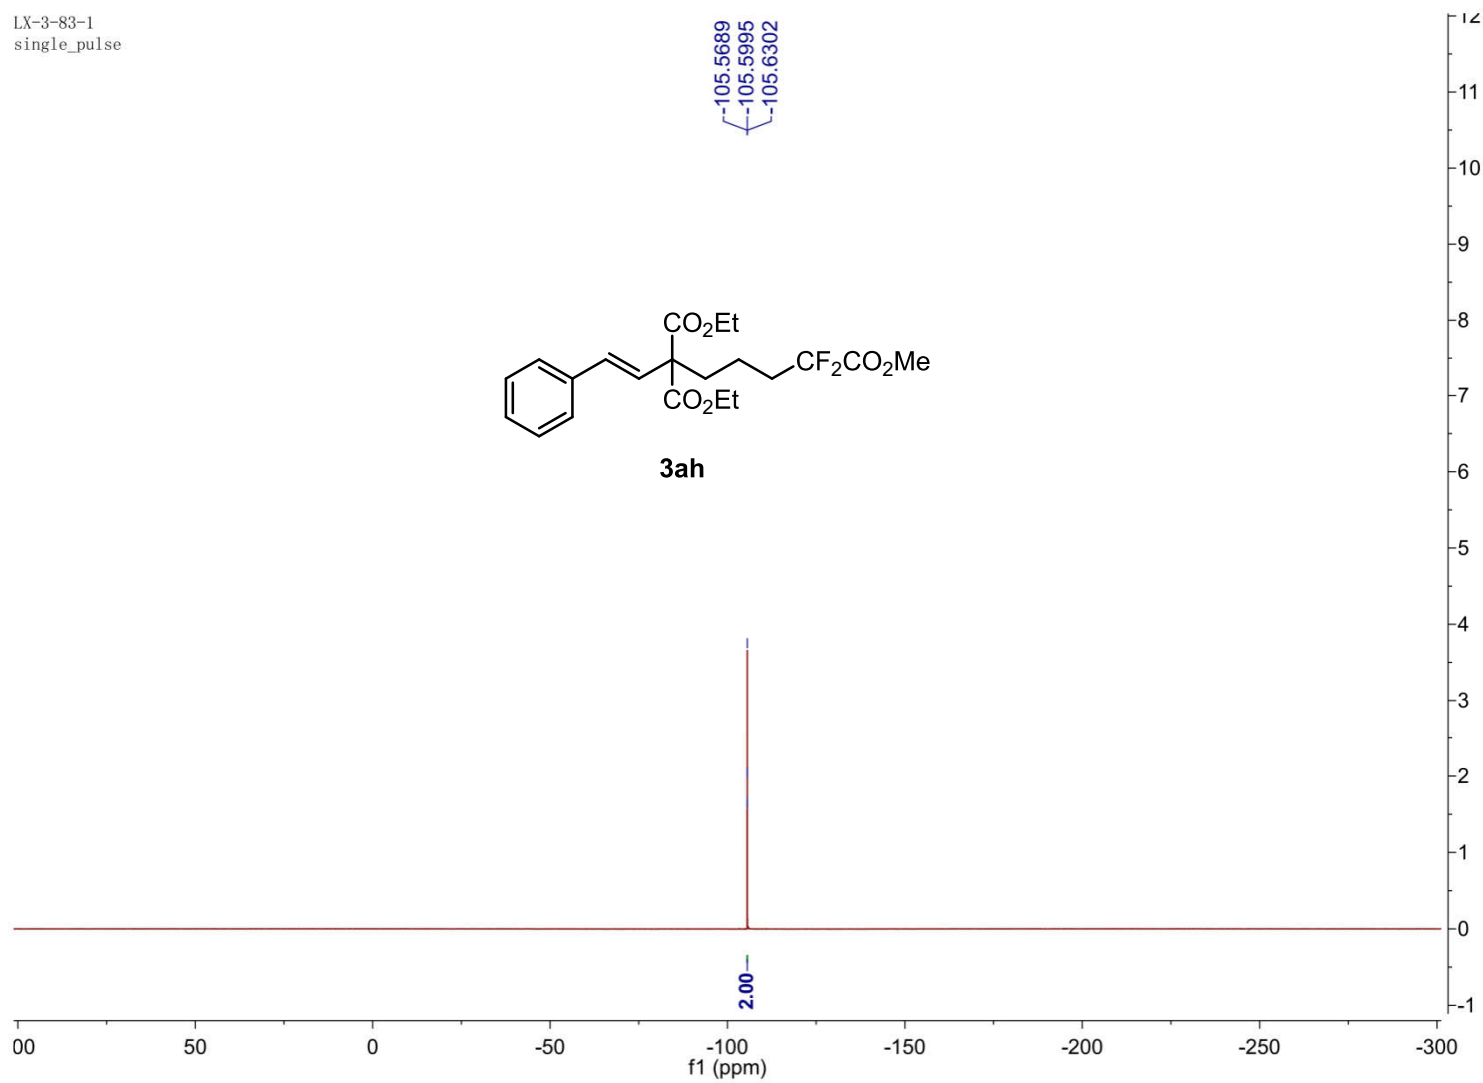

LX-3-83-1

single pulse decoupled gated NO

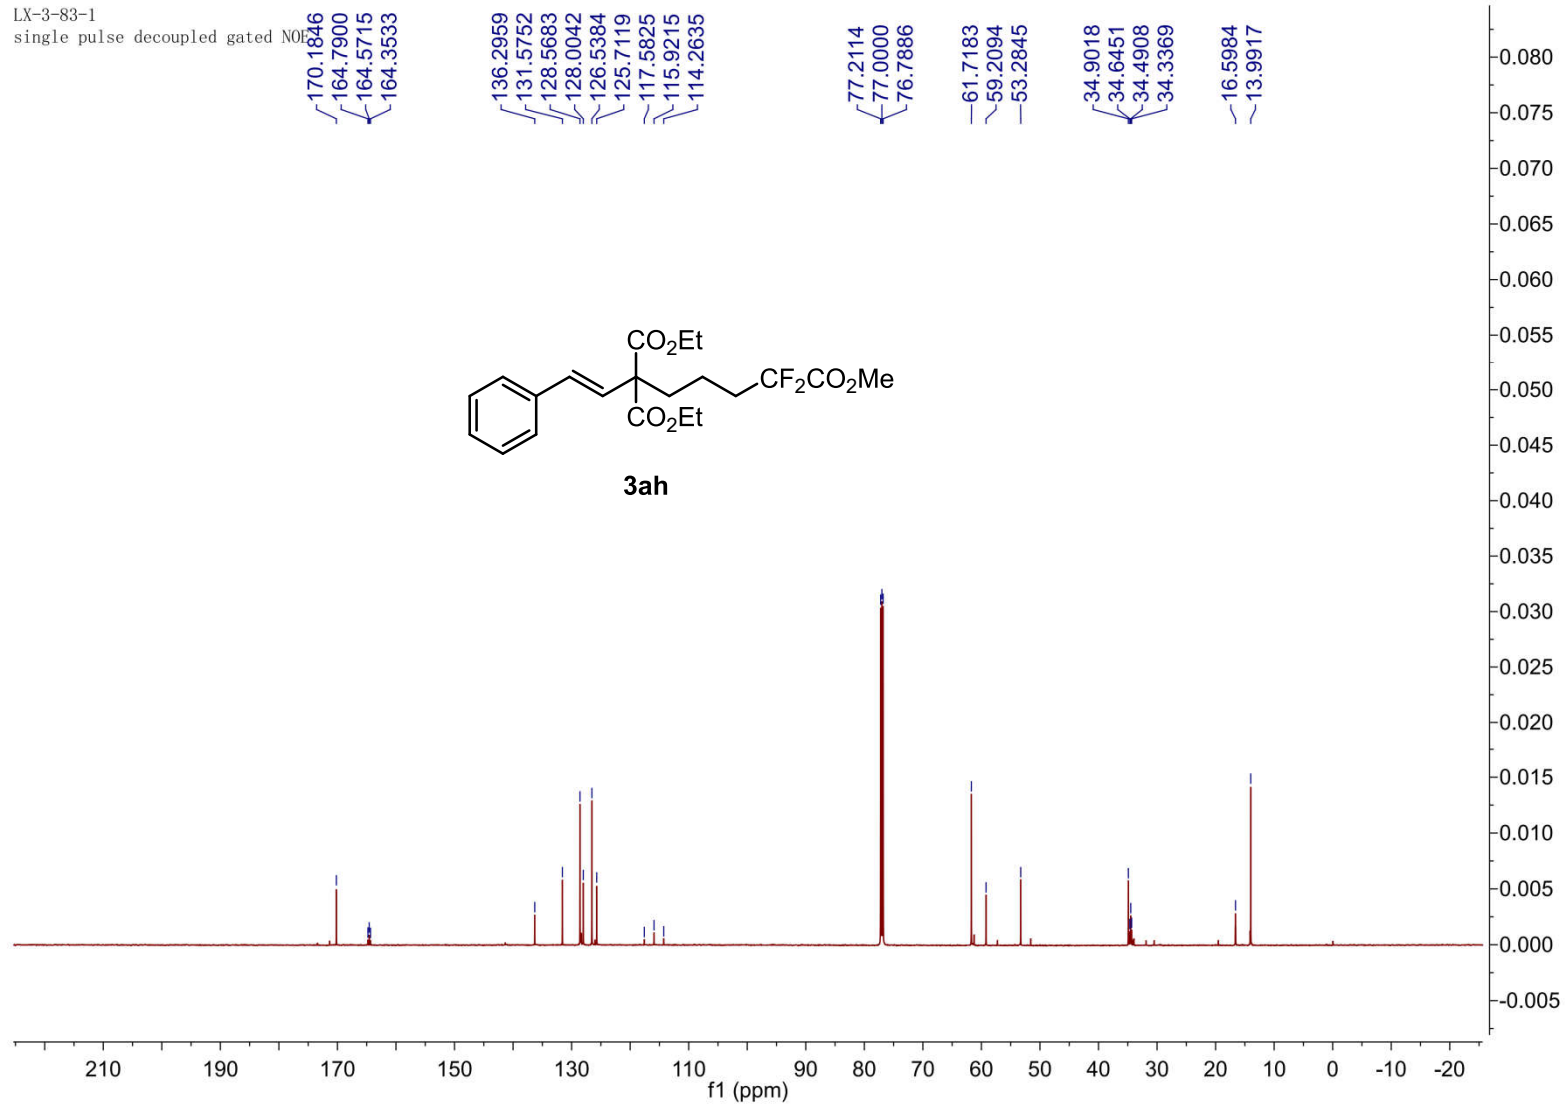

Supplement: c9cc10048b1.pdf [file c9cc10048b1.pdf]
